# Supplementary material for: Comparative Transcriptomic Analysis Reveals Candidate Genes and Pathways Involved in Larval Settlement of the Barnacle Megabalanus volcano
Source: Int J Mol Sci. 2017 Oct 27;18(11):2253. doi: 10.3390/ijms18112253 (PMC5713223; doi:10.3390/ijms18112253)
Supplement: Supplementary file 1 [file ijms-18-02253-s001.zip › Supplementary Information--TableS1-S5.xlsx]

## Sheet: Table S1
Table S1. BUSCO analysis of transcriptome assembly completeness in Megabalanus volcano
Complete (%)	68.41% (1830/2675)
Complete and single-copy (%)	62.54% (1673/2675)
Complete and Duplicated (%)	5.87% (157/2675)
Fragmented (%)	10.95% (293/2675)
Missing (%)	20.67% (553/2675)

## Sheet: Table S2
Table S2. List of DEGs that only expressed at cyprid stage
GeneID	cyprid_rpkm	adult_rpkm	log2 Ratio(adult/cyprid)	Pvalue	FDR	Description
Unigene0000039	7.1143	0.001	-12.7965	3.25e-32	1.27e-31	--
Unigene0000071	10.3356	0.001	-13.3353	5.75e-54	2.98e-53	ribosomal protein L18a [Salpingoeca rosetta]
Unigene0000108	7.1587	0.001	-12.8055	3.25e-32	1.27e-31	hypothetical protein CGI_10021010 [Crassostrea gigas]
Unigene0000109	10.5907	0.001	-13.3705	5.9e-43	2.67e-42	--
Unigene0000110	44.227	0.001	-15.4326	0	0	hypothetical protein CGI_10021010 [Crassostrea gigas]
Unigene0000111	5.2399	0.036	-7.1854	1.29e-31	4.97e-31	--
Unigene0000118	4.0408	0.1763	-4.51854	4.9e-14	1.26e-13	--
Unigene0000156	2.9272	0.001	-11.5153	4.75e-13	1.18e-12	Rps22-like protein [Diplonema papillatum]
Unigene0000157	1.6945	0.001	-10.7266	4.82e-07	9.11e-07	Rps22-like protein [Diplonema papillatum]
Unigene0000180	8.8186	0.1622	-5.7647	2.01e-47	9.66e-47	--
Unigene0000214	1.248	0.065	-4.26303	0.000122627	0.000197706	--
Unigene0000233	1.7886	0.001	-10.8046	0.000489894	0.000754178	PREDICTED: alkaline phosphatase-like [Fopius arisanus]
Unigene0000274	0.6013	0.0806	-2.89923	0.000732495	0.00111306	PREDICTED: glutamate [NMDA] receptor subunit 1 isoform X2 [Athalia rosae]
Unigene0000277	9.0449	0.001	-13.1429	5.43e-37	2.28e-36	cuticular protein RR-1 motif 57 [Danaus plexippus]
Unigene0000306	9.3847	0.0584	-7.3282	4.26e-69	2.57e-68	--
Unigene0000307	7.374	0.1941	-5.24758	1.04e-33	4.17e-33	--
Unigene0000381	5.8748	0.001	-12.5203	3.77e-15	1e-14	--
Unigene0000382	5.6342	0.001	-12.46	7.52e-15	1.99e-14	hypothetical protein DAPPUDRAFT_118838 [Daphnia pulex]
Unigene0000389	1.1481	0.001	-10.165	0.00391328	0.00561741	--
Unigene0000407	7.8256	0.0612	-6.99853	3.72e-55	1.95e-54	Fibrillin-1 [Acromyrmex echinatior]
Unigene0000408	6.0486	0.2865	-4.39999	6.03e-22	1.92e-21	AAEL012909-PA [Aedes aegypti]
Unigene0000409	0.8155	0.051	-3.99912	0.000489894	0.000754178	GA26108 [Drosophila pseudoobscura pseudoobscura]
Unigene0000478	2.9434	0.001	-11.5233	9.64e-07	1.79e-06	DNA RNA helicase domain containing protein [Haemonchus contortus]
Unigene0000479	3.5976	0.001	-11.8128	1.52e-08	3.1e-08	elongation initiation factor 4A [Trichoplusia ni]
Unigene0000493	11.2006	0.0685	-7.35326	5.47e-139	5.36e-138	--
Unigene0000501	10.4788	0.1092	-6.58436	3.81e-21	1.19e-20	--
Unigene0000529	7.8134	0.2221	-5.13667	2.56e-31	9.83e-31	--
Unigene0000630	0.5017	0.001	-8.97068	0.0312734	0.0412699	PREDICTED: ninjurin-1-like isoform X3 [Microplitis demolitor]
Unigene0000640	18.6415	0.001	-14.1862	2.6e-98	1.99e-97	40S ribosomal protein S9 [Trypanosoma brucei brucei TREU927]
Unigene0000709	7.6207	0.0899	-6.40546	3.06e-73	1.91e-72	PREDICTED: hemicentin-2-like [Plutella xylostella]
Unigene0000739	20.6139	0.1251	-7.36439	7.13e-71	4.36e-70	--
Unigene0000756	11.8458	0.001	-13.5321	1.55e-73	9.72e-73	RecName: Full=Ubiquitin-60S ribosomal protein L40; Contains: RecName: Full=Ubiquitin; Contains: RecName: Full=60S ribosomal protein L40; Flags: Precursor [Trypanosoma cruzi]
Unigene0000772	5.2672	0.1937	-4.76514	1.89e-12	4.61e-12	Follistatin-related protein 5 [Zootermopsis nevadensis]
Unigene0000773	6.4539	0.2832	-4.51028	5.2e-19	1.55e-18	PREDICTED: follistatin-related protein 5-like [Tribolium castaneum]
Unigene0000789	0.611	0.001	-9.25503	0.0312734	0.0412699	--
Unigene0000790	3.0752	0.001	-11.5865	7.59e-09	1.58e-08	--
Unigene0000838	8.3069	0.1187	-6.12892	8.5e-61	4.72e-60	--
Unigene0000839	7.7842	0.001	-12.9263	3.93e-27	1.39e-26	--
Unigene0000848	9.6587	0.1118	-6.43284	1.37e-37	5.81e-37	--
Unigene0000924	31.9845	0.001	-14.9651	1.49e-118	1.3e-117	--
Unigene0000927	0.8644	0.001	-9.75556	0.0156414	0.0212459	--
Unigene0000939	11.0425	0.001	-13.4308	1.76e-52	8.99e-52	--
Unigene0000965	5.1637	0.2748	-4.23195	1.7e-15	4.59e-15	--
Unigene0000970	5.4414	0.1479	-5.20128	1.19e-16	3.32e-16	Cubilin [Zootermopsis nevadensis]
Unigene0000989	4.2102	0.001	-12.0397	3.78e-12	9.09e-12	large subunit ribosomal protein L38e [Strigomonas culicis]
Unigene0000990	3.8776	0.001	-11.9209	6e-11	1.37e-10	large subunit ribosomal protein L38e [Strigomonas culicis]
Unigene0000995	6.3534	0.137	-5.53528	7.59e-21	2.36e-20	Diacylglycerol kinase beta, partial [Stegodyphus mimosarum]
Unigene0001004	5.9423	0.2858	-4.37794	7.17e-13	1.78e-12	--
Unigene0001032	0.4834	0.001	-8.91707	0.0312734	0.0412699	UNVERIFIED: ribosomal protein L17 [Mytilus trossulus]
Unigene0001033	4.1942	0.001	-12.0342	3.02e-20	9.23e-20	Ribosomal protein L22 L17 domain containing protein [Haemonchus contortus]
Unigene0001167	2.981	0.001	-11.5416	2.02e-30	7.62e-30	--
Unigene0001258	5.8903	0.1052	-5.80713	9.47e-13	2.34e-12	--
Unigene0001259	4.6166	0.2887	-3.99919	1.78e-15	4.8e-15	--
Unigene0001260	6.9305	0.0781	-6.47149	8.8e-39	3.78e-38	--
Unigene0001279	5.0966	0.2812	-4.17987	3.96e-11	9.13e-11	predicted protein [Nematostella vectensis]
Unigene0001295	311.301	0.1882	-10.6918	0	0	PREDICTED: pro-resilin-like, partial [Athalia rosae]
Unigene0001308	7.3635	0.001	-12.8462	9.72e-25	3.28e-24	--
Unigene0001318	20.0073	0.001	-14.2882	6.85e-89	4.9e-88	--
Unigene0001348	5.5221	0.2264	-4.60827	1.77e-20	5.46e-20	GI18644 [Drosophila mojavensis]
Unigene0001349	6.9071	0.001	-12.7539	1.59e-29	5.92e-29	--
Unigene0001358	5.708	0.0965	-5.88631	2.38e-13	5.99e-13	--
Unigene0001375	4.4501	0.1113	-5.32131	3.8e-09	8.05e-09	GE14706 [Drosophila yakuba]
Unigene0001376	0.613	0.001	-9.25974	0.0312734	0.0412699	PREDICTED: LOW QUALITY PROTEIN: fibrillin-1-like, partial [Linepithema humile]
Unigene0001378	3.7025	0.2013	-4.20108	2.2e-07	4.23e-07	GK23920 [Drosophila willistoni]
Unigene0001379	6.8101	0.0979	-6.12022	1.01e-30	3.85e-30	isoform x, partial [Lasius niger]
Unigene0001380	8.573	0.2809	-4.93167	3.28e-78	2.15e-77	PREDICTED: LOW QUALITY PROTEIN: notch-like protein isoform X1 [Bombyx mori]
Unigene0001381	4.1468	0.001	-12.0178	4.77e-10	1.05e-09	PREDICTED: LOW QUALITY PROTEIN: notch-like protein isoform X1 [Bombyx mori]
Unigene0001400	10.619	0.2656	-5.32125	1.75e-104	1.4e-103	neuroglobin-like [Acyrthosiphon pisum]
Unigene0001439	4.3736	0.2358	-4.21319	4.69e-18	1.35e-17	photosystem II oxygen evolving enhancer protein 1 [Gymnochlora stellata]
Unigene0001440	1.9867	0.2259	-3.13662	0.00183717	0.0027032	--
Unigene0001707	4.1139	0.0989	-5.37839	1.9e-09	4.08e-09	--
Unigene0001712	9.1434	0.1059	-6.43196	4.78e-56	2.53e-55	--
Unigene0001746	13.359	0.001	-13.7055	5.93e-91	4.31e-90	40S ribosomal protein SA [Trypanosoma grayi]
Unigene0001748	17.2011	0.2288	-6.23227	3.9e-97	2.96e-96	--
Unigene0001749	15.9103	0.001	-13.9577	3.06e-73	1.91e-72	--
Unigene0001805	13.2431	0.001	-13.693	3.41e-160	3.76e-159	beta-tubulin [Diplonema papillatum]
Unigene0001868	9.4206	0.001	-13.2016	1.91e-44	8.85e-44	--
Unigene0001971	9.5718	0.2631	-5.18511	1.63e-32	6.4e-32	dumpy [Anopheles darlingi]
Unigene0001973	0.4872	0.001	-8.92837	0.00391328	0.00561741	dumpy, isoform M [Drosophila melanogaster]
Unigene0001975	6.6145	0.1513	-5.45015	6.3e-29	2.32e-28	isoform x, partial [Lasius niger]
Unigene0002019	5.693	0.1039	-5.77592	1.01e-47	4.88e-47	--
Unigene0002021	5.8078	0.001	-12.5038	9.9e-28	3.55e-27	--
Unigene0002032	9.996	0.05	-7.64328	1.2e-85	8.36e-85	--
Unigene0002033	12.5494	0.1559	-6.33085	6.78e-104	5.39e-103	--
Unigene0002036	10.473	0.001	-13.3544	2.01e-58	1.09e-57	--
Unigene0002043	5.5092	0.1013	-5.76514	3.86e-24	1.29e-23	PREDICTED: polycystin-1-like isoform X3 [Crassostrea gigas]
Unigene0002068	2.7974	0.2058	-3.76477	2.12e-05	3.61e-05	--
Unigene0002069	7.405	0.001	-12.8543	2.15e-36	8.92e-36	ribosomal protein L21 [Riptortus pedestris]
Unigene0002099	1.9759	0.2648	-2.89953	2.24e-10	5.02e-10	PREDICTED: receptor-type tyrosine-protein phosphatase kappa isoform X2 [Bombyx mori]
Unigene0002146	5.097	0.1203	-5.40494	4.77e-19	1.42e-18	--
Unigene0002150	1.6958	0.1178	-3.84755	1.11e-05	1.92e-05	Cadherin-related tumor suppressor [Zootermopsis nevadensis]
Unigene0002200	144.661	0.0428	-11.7228	0	0	--
Unigene0002210	15.1553	0.001	-13.8875	6.32e-81	4.25e-80	ribosomal protein S23a [Diplonema papillatum]
Unigene0002227	6.0724	0.001	-12.5681	4.88e-25	1.66e-24	--
Unigene0002228	16.3327	0.001	-13.9955	2.37e-85	1.65e-84	--
Unigene0002254	23.0155	0.0569	-8.65996	1.56e-86	1.1e-85	--
Unigene0002274	40.0543	0.2105	-7.57199	2.36e-161	2.62e-160	Cuticle protein 7 [Lepeophtheirus salmonis]
Unigene0002287	7.5474	0.001	-12.8818	1.08e-36	4.5e-36	--
Unigene0002288	13.6875	0.1076	-6.99104	0	0	PREDICTED: RNA-directed DNA polymerase from mobile element jockey-like [Strongylocentrotus purpuratus]
Unigene0002338	2.5244	0.001	-11.3017	1.52e-08	3.1e-08	--
Unigene0002339	1.1829	0.001	-10.2081	0.000489894	0.000754178	--
Unigene0002341	0.8426	0.001	-9.7187	3.85e-06	6.89e-06	--
Unigene0002349	7.9746	0.089	-6.48546	3.99e-58	2.15e-57	Bruno-3 transcript variant 33 [Drosophila persimilis]
Unigene0002381	7.9502	0.001	-12.9568	1.94e-24	6.5e-24	--
Unigene0002416	1.3342	0.2086	-2.67716	0.0117402	0.0161671	--
Unigene0002564	8.5532	0.2931	-4.867	3.1e-26	1.08e-25	--
Unigene0002584	7.2505	0.223	-5.02296	1.7e-83	1.17e-82	PREDICTED: dnaJ homolog subfamily A member 1-like isoform X1 [Saccoglossus kowalevskii]
Unigene0002590	0.4246	0.001	-8.72996	0.0312734	0.0412699	--
Unigene0002601	1.3777	0.001	-10.428	0.00391328	0.00561741	--
Unigene0002602	0.861	0.001	-9.74987	0.0312734	0.0412699	--
Unigene0002616	15.1742	0.2277	-6.05834	1.5e-43	6.83e-43	PREDICTED: titin isoform X2 [Bombus impatiens]
Unigene0002619	267.319	0.105	-11.314	0	0	--
Unigene0002656	2.1902	0.0652	-5.07005	6.05e-08	1.2e-07	--
Unigene0002669	1.0732	0.001	-10.0677	0.0156414	0.0212459	--
Unigene0002692	12.8343	0.1945	-6.04409	1.57e-57	8.4e-57	--
Unigene0002693	8.467	0.1436	-5.88172	7.72e-102	6.06e-101	P3 protein, partial [Stegodyphus mimosarum]
Unigene0002694	15.7901	0.2043	-6.27219	8.81e-100	6.81e-99	--
Unigene0002732	14.4806	0.1502	-6.59109	1.57e-283	2.79e-282	PREDICTED: venom carboxylesterase-6 [Tribolium castaneum]
Unigene0002752	16.1502	0.0804	-7.65014	0	0	--
Unigene0002773	6.4513	0.2339	-4.78563	4.02e-23	1.31e-22	TPA_inf: cathepsin L-like cysteine proteinase A [Amblyomma variegatum]
Unigene0002810	3.4124	0.001	-11.7366	4.82e-07	9.11e-07	--
Unigene0002811	17.37	0.1012	-7.42324	3.46e-287	6.24e-286	--
Unigene0002823	12.7758	0.001	-13.6411	1.41e-70	8.6e-70	ADP/ATP translocase [Artemia franciscana]
Unigene0002827	3.7244	0.2055	-4.1798	3.96e-11	9.13e-11	PREDICTED: titin-like [Microplitis demolitor]
Unigene0002872	20.8366	0.1002	-7.70009	4.84e-45	2.26e-44	--
Unigene0002969	0.861	0.001	-9.74987	0.00391328	0.00561741	PREDICTED: transcription factor Adf-1-like isoform X3 [Linepithema humile]
Unigene0003074	1.4447	0.084	-4.10424	4.9e-14	1.26e-13	--
Unigene0003127	34.2174	0.001	-15.0624	9.98e-67	5.87e-66	--
Unigene0003128	35.9869	0.1082	-8.37763	3.61e-71	2.21e-70	--
Unigene0003135	1.2189	0.0953	-3.67696	0.00391328	0.00561741	--
Unigene0003150	11.0798	0.1155	-6.5839	9.18e-42	4.1e-41	--
Unigene0003246	2.807	0.001	-11.4548	1.21e-07	2.36e-07	PREDICTED: polycystic kidney disease protein 1-like 2-like [Metaseiulus occidentalis]
Unigene0003259	21.444	0.001	-14.3883	5.93e-91	4.31e-90	--
Unigene0003284	18.8363	0.2362	-6.31736	1.01e-119	8.83e-119	--
Unigene0003297	13.4636	0.001	-13.7168	1.12e-77	7.32e-77	60S ribosomal protein L11 [Strongyloides ratti]
Unigene0003343	4.7378	0.001	-12.21	9.53e-10	2.07e-09	--
Unigene0003368	795.082	0.2717	-11.5149	0	0	--
Unigene0003397	13.7263	0.001	-13.7447	1.56e-26	5.45e-26	--
Unigene0003399	11.371	0.001	-13.4731	1.26e-28	4.59e-28	--
Unigene0003432	42.6921	0.0787	-9.08339	4.86e-115	4.15e-114	--
Unigene0003482	25.2043	0.0501	-8.97464	1.87e-211	2.59e-210	BCS-4 [Amphibalanus amphitrite]
Unigene0003487	16.4174	0.0859	-7.57835	8.23e-82	5.57e-81	--
Unigene0003558	33.7077	0.001	-15.0408	4e-107	3.25e-106	--
Unigene0003603	1.5363	0.001	-10.5852	0.000489894	0.000754178	--
Unigene0003675	35.1037	0.1502	-7.86859	1.59e-292	2.92e-291	SIFamide [Amphibalanus amphitrite]
Unigene0003706	7.9896	0.1523	-5.71314	3.1e-57	1.66e-56	--
Unigene0003707	7.5518	0.001	-12.8826	4.88e-25	1.66e-24	--
Unigene0003708	8.6186	0.11	-6.29188	2.64e-34	1.06e-33	--
Unigene0003712	11.7759	0.2653	-5.47207	4.43e-39	1.91e-38	--
Unigene0003754	2.2284	0.001	-11.1218	6.14e-05	0.000101469	--
Unigene0003763	1.9964	0.001	-10.9632	0.000245094	0.000385742	--
Unigene0003764	1.4038	0.001	-10.4551	0.00391328	0.00561741	--
Unigene0003765	1.8597	0.001	-10.8609	0.000245094	0.000385742	--
Unigene0003768	4.4501	0.1113	-5.32131	3.8e-09	8.05e-09	--
Unigene0003769	1.4591	0.114	-3.67797	0.00391328	0.00561741	--
Unigene0003770	1.2283	0.001	-10.2624	0.00782344	0.0109487	--
Unigene0003786	4.786	0.1663	-4.84696	5.27e-24	1.75e-23	--
Unigene0003788	3.2982	0.0665	-5.63218	3e-11	6.96e-11	--
Unigene0003789	5.0993	0.0693	-6.2013	2.38e-16	6.57e-16	--
Unigene0003817	3.4124	0.1067	-4.99915	2.41e-07	4.64e-07	--
Unigene0003843	7.4381	0.001	-12.8607	4.74e-16	1.3e-15	--
Unigene0003844	10.7097	0.001	-13.3866	1.94e-24	6.5e-24	--
Unigene0003851	7.7374	0.215	-5.16944	1.01e-47	4.88e-47	--
Unigene0003912	6.7792	0.2174	-4.96269	2.99e-14	7.76e-14	--
Unigene0003915	3.8194	0.001	-11.8991	3e-17	8.48e-17	PREDICTED: chaoptin isoform X1 [Bactrocera dorsalis]
Unigene0003917	5.6588	0.1011	-5.80664	9.47e-13	2.34e-12	PREDICTED: extracellular matrix protein 2 isoform X2 [Solenopsis invicta]
Unigene0003918	8.6716	0.0609	-7.15371	5.1e-31	1.95e-30	PREDICTED: chaoptin isoform X2 [Linepithema humile]
Unigene0003919	6.2071	0.2724	-4.51012	5.2e-19	1.55e-18	PREDICTED: chaoptin [Fopius arisanus]
Unigene0003957	8.4843	0.2087	-5.34529	3.04e-106	2.45e-105	--
Unigene0003958	10.4209	0.2209	-5.55994	1.64e-162	1.83e-161	neuropeptide-like precursor 1 [Tribolium castaneum]
Unigene0003965	7.5264	0.001	-12.8777	1.91e-21	6.02e-21	--
Unigene0003985	4.0557	0.0818	-5.63171	3e-11	6.96e-11	nicotinic acetylcholine receptor subunit alpha 3 [Pandalopsis japonica]
Unigene0003986	18.2416	0.001	-14.1549	4.26e-69	2.57e-68	--
Unigene0004004	106.431	0.1613	-9.36595	4.4e-275	7.69e-274	--
Unigene0004016	10.8076	0.001	-13.3998	1.82e-71	1.12e-70	ribosomal protein S3 [Capsaspora owczarzaki ATCC 30864]
Unigene0004029	9.2563	0.1453	-5.99333	5.43e-83	3.71e-82	TWiK family of potassium channels protein 7, partial [Stegodyphus mimosarum]
Unigene0004068	13.7431	0.0372	-8.52919	2.69e-232	4.03e-231	--
Unigene0004141	4.3052	0.001	-12.0719	7.59e-09	1.58e-08	--
Unigene0004163	1.2097	0.1081	-3.48421	3.76e-08	7.54e-08	PREDICTED: ras-related and estrogen-regulated growth inhibitor [Megachile rotundata]
Unigene0004186	5.6892	0.1694	-5.06972	1.21e-22	3.92e-22	TPA_exp: heat shock protein 90 [Amblyomma variegatum]
Unigene0004187	10.0267	0.2095	-5.58075	1.1e-154	1.18e-153	heat shock protein 90 [Theileria parva]
Unigene0004219	6.0851	0.0536	-6.8269	9.72e-25	3.28e-24	--
Unigene0004224	9.6055	0.2184	-5.45882	1.2e-19	3.62e-19	--
Unigene0004273	0.5991	0.001	-9.22665	0.0312734	0.0412699	--
Unigene0004349	3.7781	0.189	-4.3212	5.88e-08	1.17e-07	PREDICTED: nucleolar RNA helicase 2 [Strongylocentrotus purpuratus]
Unigene0004350	2.7528	0.001	-11.4267	4.82e-07	9.11e-07	PREDICTED: nucleolar RNA helicase 2 [Ciona intestinalis]
Unigene0004455	3.3916	0.1178	-4.84755	4.75e-13	1.18e-12	C-type allatostatin [Amphibalanus amphitrite]
Unigene0004496	5.4904	0.001	-12.4227	5.97e-14	1.53e-13	--
Unigene0004517	11.0744	0.2067	-5.74355	3.99e-47	1.91e-46	FUTSCH precursor [Drosophila melanogaster]
Unigene0004518	11.8366	0.1184	-6.64344	3.37e-128	3.11e-127	PREDICTED: microtubule-associated protein futsch [Bactrocera cucurbitae]
Unigene0004519	14.6913	0.0928	-7.30662	6.56e-135	6.28e-134	--
Unigene0004520	4.9771	0.001	-12.2811	1.5e-14	3.92e-14	--
Unigene0004624	87.0649	0.0702	-10.2764	0	0	--
Unigene0004672	50.2708	0.001	-15.6174	9.06e-266	1.53e-264	--
Unigene0004682	5.4627	0.001	-12.4154	9.47e-13	2.34e-12	--
Unigene0004733	0.6701	0.1197	-2.48495	4.34e-06	7.75e-06	hypothetical protein DAPPUDRAFT_252028 [Daphnia pulex]
Unigene0004795	6.8857	0.0706	-6.60779	1.91e-21	6.02e-21	--
Unigene0004823	5.5929	0.001	-12.4494	3e-17	8.48e-17	PREDICTED: kinesin-like protein FLA10 isoform X2 [Ceratosolen solmsi marchali]
Unigene0004852	25.0342	0.0645	-8.60039	0	0	PREDICTED: transposable element P transposase isoform X2 [Vollenhovia emeryi]
Unigene0004871	6.7743	0.001	-12.7259	3.02e-20	9.23e-20	--
Unigene0004872	11.1224	0.1506	-6.2066	0	0	PREDICTED: glutamate receptor ionotropic, NMDA 2B isoform X2 [Bombus impatiens]
Unigene0004877	10.2024	0.001	-13.3166	1.91e-21	6.02e-21	--
Unigene0004925	0.4152	0.001	-8.69766	0.0156414	0.0212459	PREDICTED: eukaryotic translation initiation factor 5A-1-like [Amphimedon queenslandica]
Unigene0005068	0.9767	0.111	-3.13736	0.00183717	0.0027032	--
Unigene0005108	0.8365	0.1356	-2.62501	1.67e-21	5.27e-21	TPA_exp: pol polyprotein [Schistosoma mansoni]
Unigene0005109	0.4556	0.1424	-1.67782	4.55e-07	8.62e-07	TPA_exp: pol polyprotein [Schistosoma mansoni]
Unigene0005190	9.8493	0.001	-13.2658	3.03e-65	1.76e-64	RecName: Full=40S ribosomal protein S4 [Spodoptera frugiperda]
Unigene0005289	5.5213	0.001	-12.4308	3.78e-12	9.09e-12	--
Unigene0005290	10.0886	0.001	-13.3004	1.67e-68	9.97e-68	--
Unigene0005415	15.457	0.2248	-6.10347	1.31e-59	7.15e-59	--
Unigene0005416	10.7542	0.001	-13.3926	1.94e-24	6.5e-24	--
Unigene0005449	18.9967	0.001	-14.2135	7.93e-87	5.57e-86	--
Unigene0005571	5.3155	0.2292	-4.53553	2.64e-29	9.78e-29	--
Unigene0005662	57.9558	0.001	-15.8227	1.4e-232	2.09e-231	--
Unigene0005700	9.8946	0.0998	-6.63146	9.59e-22	3.04e-21	Synapsin, partial [Zootermopsis nevadensis]
Unigene0005701	12.3294	0.1841	-6.06547	2.48e-115	2.12e-114	Synapsin, partial [Zootermopsis nevadensis]
Unigene0005745	2.418	0.189	-3.67736	4.04e-05	6.76e-05	PREDICTED: trypsin 3A1 [Musca domestica]
Unigene0005820	4.2222	0.001	-12.0438	3.78e-18	1.1e-17	nicotinic acetylcholine receptor subunit alpha 6 [Nasonia vitripennis]
Unigene0005842	4.4167	0.0588	-6.23101	1.19e-16	3.32e-16	--
Unigene0005901	8.5216	0.001	-13.0569	4.02e-30	1.51e-29	UNKNOWN [Stylonychia lemnae]
Unigene0005978	6.4767	0.001	-12.661	7.59e-21	2.36e-20	--
Unigene0005998	65.2092	0.0159	-12.0018	0	0	Muscle LIM protein Mlp84B [Zootermopsis nevadensis]
Unigene0006016	0.785	0.001	-9.61655	0.0156414	0.0212459	--
Unigene0006030	30.3171	0.001	-14.8878	1.48e-155	1.6e-154	--
Unigene0006126	6.6455	0.001	-12.6982	2.39e-19	7.16e-19	--
Unigene0006325	7.7833	0.091	-6.41837	2.73e-37	1.15e-36	--
Unigene0006439	12.1714	0.1064	-6.83785	1.66e-49	8.18e-49	--
Unigene0006910	8.6805	0.2215	-5.2924	6.67e-35	2.71e-34	--
Unigene0006948	0.6399	0.001	-9.3217	0.00782344	0.0109487	transposable element tc3 transposase [Lasius niger]
Unigene0006996	22.2354	0.0638	-8.44509	1.02e-74	6.44e-74	--
Unigene0007135	4.0855	0.1597	-4.67708	7.54e-12	1.79e-11	hypothetical protein DAPPUDRAFT_115964 [Daphnia pulex]
Unigene0007286	13.6447	0.0922	-7.20936	9.19e-64	5.25e-63	DD9A [Marsupenaeus japonicus]
Unigene0007403	5.9301	0.001	-12.5338	3.93e-27	1.39e-26	KRAB-A domain-containing protein [Schistosoma mansoni]
Unigene0007404	6.2254	0.2732	-4.51014	5.2e-19	1.55e-18	Retrovirus-related Pol polyprotein from transposon 412, partial [Stegodyphus mimosarum]
Unigene0007409	315.285	0.1391	-11.1463	0	0	per os infectivity factor pif-1 [Microplitis demolitor]
Unigene0007410	22.7091	0.001	-14.471	0	0	HzNVORF144-like protein [Chelonus inanitus]
Unigene0007415	0.6896	0.001	-9.42962	2.39e-10	5.34e-10	--
Unigene0007520	4.3052	0.1795	-4.58402	6e-11	1.37e-10	--
Unigene0007547	18.0743	0.0457	-8.62753	3.84e-167	4.38e-166	SON protein, partial [Harpegnathos saltator]
Unigene0007548	33.9396	0.001	-15.0507	6.82e-296	1.26e-294	PREDICTED: titin isoform X4 [Bactrocera dorsalis]
Unigene0007549	40.3393	0.1184	-8.41237	3.16e-144	3.18e-143	SON protein, partial [Harpegnathos saltator]
Unigene0007585	185.21	0.1957	-9.88631	0	0	--
Unigene0007599	9.5498	0.1468	-6.02355	1.17e-42	5.29e-42	--
Unigene0007609	11.0419	0.001	-13.4307	3.9e-97	2.96e-96	--
Unigene0007610	10.9603	0.001	-13.42	4.48e-136	4.31e-135	PREDICTED: vesicular inhibitory amino acid transporter [Athalia rosae]
Unigene0007660	43.9241	0.001	-15.4227	5.09e-255	8.29e-254	--
Unigene0007719	15.0042	0.1794	-6.38604	2.65e-230	3.93e-229	PREDICTED: Kv channel-interacting protein 4-like isoform X2 [Tribolium castaneum]
Unigene0007763	17.0138	0.0357	-8.89657	0	0	vitellogenin 2 [Tigriopus japonicus]
Unigene0007772	14.2504	0.0814	-7.45176	2.6e-75	1.66e-74	--
Unigene0007773	18.9815	0.0559	-8.40753	6.17e-144	6.2e-143	--
Unigene0007793	9.3669	0.001	-13.1934	1.5e-43	6.83e-43	--
Unigene0007828	17.4932	0.0411	-8.73344	2.84e-179	3.42e-178	PREDICTED: sphingolipid delta(4)-desaturase DES1 [Nasonia vitripennis]
Unigene0007939	12.2351	0.2908	-5.39485	1.11e-145	1.13e-144	Neural proliferation differentiation and control protein 1, partial [Stegodyphus mimosarum]
Unigene0007996	8.1645	0.1781	-5.51861	3.33e-60	1.84e-59	--
Unigene0007998	17.1332	0.1752	-6.61165	9.54e-268	1.63e-266	--
Unigene0008025	538.966	0.1409	-11.9013	0	0	PREDICTED: endocuticle structural glycoprotein ABD-4-like [Microplitis demolitor]
Unigene0008100	5.8613	0.2177	-4.75081	5.06e-34	2.03e-33	--
Unigene0008165	88.7342	0.0656	-10.4016	0	0	--
Unigene0008358	86.3798	0.001	-16.3984	0	0	--
Unigene0008431	14.547	0.2441	-5.89711	1.51e-240	2.33e-239	GTP-binding protein Di-Ras2 [Zootermopsis nevadensis]
Unigene0008466	15.0508	0.001	-13.8776	1.37e-168	1.57e-167	PREDICTED: RNA-directed DNA polymerase from mobile element jockey-like [Vollenhovia emeryi]
Unigene0008567	5.8182	0.1102	-5.72238	3.78e-12	9.09e-12	--
Unigene0008716	13.9758	0.183	-6.25494	4.06e-131	3.81e-130	--
Unigene0008748	13.9302	0.1146	-6.92547	1.56e-26	5.45e-26	--
Unigene0008756	6.1459	0.001	-12.5854	1.5e-14	3.92e-14	--
Unigene0008757	1.0799	0.001	-10.0767	0.00782344	0.0109487	--
Unigene0008758	198.467	0.001	-17.5985	0	0	--
Unigene0008759	249.648	0.2708	-9.84845	0	0	--
Unigene0008871	6.0616	0.001	-12.5655	4.75e-13	1.18e-12	--
Unigene0008929	3.8903	0.001	-11.9257	2.39e-10	5.34e-10	--
Unigene0009072	3.5947	0.2248	-3.99916	1.57e-06	2.88e-06	--
Unigene0009073	8.3042	0.2008	-5.37001	1.82e-63	1.04e-62	--
Unigene0009100	11.8509	0.2566	-5.52933	7.06e-169	8.11e-168	PREDICTED: caveolin-3-like [Harpegnathos saltator]
Unigene0009160	6.3994	0.1143	-5.80704	9.72e-25	3.28e-24	GH22482 [Drosophila grimshawi]
Unigene0009194	0.3437	0.001	-8.42501	0.00782344	0.0109487	Atrial natriuretic peptide receptor B, partial [Zootermopsis nevadensis]
Unigene0009265	9.7766	0.001	-13.2551	4.48e-53	2.3e-52	--
Unigene0009266	16.1181	0.001	-13.9764	3.74e-140	3.7e-139	--
Unigene0009267	11.3448	0.001	-13.4697	1.62e-81	1.1e-80	--
Unigene0009268	12.635	0.0786	-7.32868	1.17e-136	1.13e-135	--
Unigene0009269	17.3297	0.0336	-9.01057	4.23414258485948e-321	8.48557746732341e-320	PREDICTED: sodium- and chloride-dependent GABA transporter 1 [Megachile rotundata]
Unigene0009294	4.4178	0.2192	-4.33301	8.8e-20	2.66e-19	--
Unigene0009313	8.8651	0.001	-13.1139	3.35e-35	1.37e-34	small subunit ribosomal protein 28, partial [Rhabditoides inermis]
Unigene0009326	3.8468	0.0752	-5.67678	1.5e-11	3.54e-11	--
Unigene0009380	4.2415	0.221	-4.26246	8.67e-16	2.36e-15	GK21884 [Drosophila willistoni]
Unigene0009416	5.2117	0.001	-12.3475	5.98e-17	1.68e-16	GH21562 [Drosophila grimshawi]
Unigene0009418	15.9169	0.1909	-6.3816	8.99e-143	9e-142	GK12384 [Drosophila willistoni]
Unigene0009419	19.231	0.2108	-6.51142	0	0	--
Unigene0009569	0.8388	0.001	-9.71218	0.00782344	0.0109487	--
Unigene0009580	1.0528	0.001	-10.04	0.0156414	0.0212459	--
Unigene0009696	6.7752	0.001	-12.726	9.72e-25	3.28e-24	PREDICTED: chloroplast stem-loop binding protein of 41 kDa b, chloroplastic-like [Aplysia californica]
Unigene0009698	0.6458	0.001	-9.33494	0.0156414	0.0212459	--
Unigene0009699	10.5564	0.001	-13.3658	1.01e-92	7.46e-92	PREDICTED: chloroplast stem-loop binding protein of 41 kDa b, chloroplastic-like [Aplysia californica]
Unigene0009725	4.7378	0.001	-12.21	9.53e-10	2.07e-09	PREDICTED: membrane-bound alkaline phosphatase-like isoform X1 [Acyrthosiphon pisum]
Unigene0009731	0.8265	0.001	-9.69087	0.0312734	0.0412699	--
Unigene0009806	16.1089	0.001	-13.9756	1.3e-170	1.51e-169	--
Unigene0009838	44.8748	0.001	-15.4536	0	0	PREDICTED: centrosomal protein of 135 kDa isoform X1 [Microplitis demolitor]
Unigene0009844	20.0255	0.001	-14.2896	4.5e-152	4.75e-151	--
Unigene0009880	13.6953	0.0373	-8.52029	1.38e-230	2.05e-229	--
Unigene0009881	8.439	0.001	-13.0429	1.75e-38	7.49e-38	--
Unigene0009893	3.0137	0.001	-11.5573	2.15e-36	8.92e-36	--
Unigene0009963	4.2266	0.001	-12.0453	7.59e-09	1.58e-08	--
Unigene0009964	4.0849	0.001	-11.9961	1.19e-16	3.32e-16	--
Unigene0009973	1469.68	0.0616	-14.5422	0	0	--
Unigene0009974	0.7714	0.001	-9.59134	0.0312734	0.0412699	--
Unigene0009976	2.3933	0.001	-11.2248	3.85e-06	6.89e-06	--
Unigene0010037	71.6245	0.0892	-9.64919	0	0	--
Unigene0010043	8.0649	0.001	-12.9774	2.02e-30	7.62e-30	--
Unigene0010063	12.3235	0.001	-13.5891	4.38e-77	2.84e-76	--
Unigene0010096	16.5743	0.0524	-8.30517	2.34e-264	3.94e-263	guanine nucleotide-binding protein beta 2 [Danaus plexippus]
Unigene0010182	26.7583	0.0505	-9.04949	1.07e-112	9.01e-112	histone H4 [Trypanosoma brucei brucei TREU927]
Unigene0010212	41.0393	0.2437	-7.39576	0	0	--
Unigene0010242	1.3587	0.001	-10.408	0.00391328	0.00561741	--
Unigene0010309	1.5868	0.2481	-2.67713	0.00419502	0.00600506	--
Unigene0010377	3.0305	0.001	-11.5653	3.03e-08	6.12e-08	aldo-keto reductase, partial [Schistocerca gregaria]
Unigene0010393	26.4349	0.001	-14.6902	6.15e-111	5.11e-110	Cuticle protein 19 [Lepeophtheirus salmonis]
Unigene0010574	8.4698	0.001	-13.0481	5.1e-48	2.47e-47	Thrombospondin type-1 domain-containing protein 7B, partial [Stegodyphus mimosarum]
Unigene0010586	5.5771	0.2191	-4.66985	1.6e-63	9.13e-63	pol-like protein [Ciona intestinalis]
Unigene0010640	6748.24	0.2608	-14.6593	0	0	--
Unigene0010669	3.9508	0.2823	-3.80684	2.23e-10	5e-10	--
Unigene0010725	491.98	0.001	-18.9082	0	0	--
Unigene0010727	26.4004	0.001	-14.6883	4.78e-56	2.53e-55	--
Unigene0010728	1903.37	0.1097	-14.0827	0	0	--
Unigene0010763	3.7025	0.1543	-4.58469	6.52e-15	1.73e-14	--
Unigene0010775	2.1504	0.2339	-3.20064	1.65e-06	3.02e-06	--
Unigene0010791	0.931	0.2687	-1.79278	0.0118586	0.0163047	--
Unigene0010854	1.4951	0.165	-3.1797	0.000122056	0.000197267	--
Unigene0010856	5.2893	0.001	-12.3689	4.74e-16	1.3e-15	--
Unigene0010867	24.5194	0.001	-14.5816	1.49e-118	1.3e-117	core histone H2A/H2B/H3/H4 [Trichuris suis]
Unigene0010883	2.6212	0.001	-11.356	3.85e-06	6.89e-06	--
Unigene0010884	89.6868	0.001	-16.4526	5.21e-168	5.95e-167	--
Unigene0010888	10033.4	0.253	-15.2753	0	0	--
Unigene0010889	2480.07	0.1386	-14.1272	0	0	--
Unigene0010890	1628.19	0.001	-20.6348	0	0	--
Unigene0010891	2257.88	0.2004	-13.4598	0	0	--
Unigene0010894	19.7166	0.001	-14.2671	4.84e-45	2.26e-44	--
Unigene0010896	512.229	0.001	-18.9664	0	0	--
Unigene0010897	478.531	0.001	-18.8683	0	0	--
Unigene0010974	5.4449	0.1135	-5.58414	6e-11	1.37e-10	--
Unigene0011051	11.9096	0.1529	-6.28339	2.83e-166	3.21e-165	PREDICTED: protein sister of odd and bowel [Fopius arisanus]
Unigene0011109	7.0047	0.0569	-6.94375	7.82e-27	2.75e-26	--
Unigene0011163	8.383	0.2184	-5.26242	3e-17	8.48e-17	--
Unigene0011198	4.9447	0.1508	-5.03517	7.52e-15	1.99e-14	THAP domain-containing protein 9, partial [Camponotus floridanus]
Unigene0011199	3.4282	0.1072	-4.99907	2.41e-07	4.64e-07	--
Unigene0011200	6.585	0.001	-12.685	1.89e-18	5.54e-18	--
Unigene0011208	1.6484	0.001	-10.6869	6.14e-05	0.000101469	GG19216 [Drosophila erecta]
Unigene0011209	8.9688	0.2876	-4.96278	9.9e-28	3.55e-27	GG19216 [Drosophila erecta]
Unigene0011259	16.983	0.001	-14.0518	3.72e-55	1.95e-54	--
Unigene0011291	0.416	0.001	-8.70044	0.0156414	0.0212459	--
Unigene0011368	3.9243	0.001	-11.9382	3.03e-08	6.12e-08	--
Unigene0011369	3.1271	0.001	-11.6106	7.59e-09	1.58e-08	--
Unigene0011400	10.9263	0.2267	-5.59088	1.55e-73	9.72e-73	--
Unigene0011406	9.6335	0.2177	-5.46765	3.17e-29	1.17e-28	--
Unigene0011447	1.8513	0.001	-10.8543	3e-11	6.96e-11	--
Unigene0011449	1630.91	0.1648	-13.2727	0	0	--
Unigene0011687	48.9607	0.0762	-9.32762	2.29e-136	2.21e-135	--
Unigene0011707	7.9686	0.0608	-7.03411	1.22e-56	6.48e-56	--
Unigene0011746	5.5871	0.2086	-4.74329	1.56e-22	5.02e-22	--
Unigene0011843	5.0417	0.197	-4.67764	7.54e-12	1.79e-11	--
Unigene0011844	14.3986	0.1286	-6.80689	1.3e-48	6.32e-48	--
Unigene0011845	8.6879	0.2539	-5.09668	2.6e-75	1.66e-74	Vesicular acetylcholine transporter, partial [Stegodyphus mimosarum]
Unigene0011847	10.0831	0.0757	-7.05743	9.59e-170	1.11e-168	--
Unigene0011848	13.6949	0.0956	-7.16241	0	0	PREDICTED: vesicular acetylcholine transporter [Bombus impatiens]
Unigene0011849	7.3774	0.1293	-5.83432	1.37e-37	5.81e-37	--
Unigene0011869	2.3828	0.1146	-4.37798	1.57e-08	3.21e-08	--
Unigene0011954	5.0587	0.001	-12.3046	1.19e-16	3.32e-16	sodium- and chloride-dependent neurotransmitter transporter [Culex quinquefasciatus]
Unigene0011959	5.7291	0.1218	-5.55572	1.37e-51	6.95e-51	Polycystic kidney disease protein 1-like 2, partial [Stegodyphus mimosarum]
Unigene0011989	30.9248	0.001	-14.9165	0	0	endocuticle structural glycoprotein SgAbd-1 [Culex quinquefasciatus]
Unigene0012001	67.354	0.001	-16.0395	6.35e-173	7.45e-172	--
Unigene0012002	94.1526	0.001	-16.5227	3.28e-276	5.74e-275	--
Unigene0012003	38.7633	0.001	-15.2424	6.67e-76	4.28e-75	--
Unigene0012111	1.2816	0.001	-10.3237	0.00097925	0.00147092	--
Unigene0012171	9.2146	0.001	-13.1697	2.6e-75	1.66e-74	--
Unigene0012180	333.974	0.0426	-12.9366	0	0	AAEL008285-PA [Aedes aegypti]
Unigene0012192	5.708	0.001	-12.4788	4.75e-13	1.18e-12	--
Unigene0012206	6.9601	0.1795	-5.27705	1.33e-34	5.36e-34	--
Unigene0012247	1.6352	0.1461	-3.48444	0.000145836	0.000233094	--
Unigene0012259	103.821	0.001	-16.6637	5.11e-230	7.58e-229	--
Unigene0012260	4.007	0.001	-11.9683	7.59e-09	1.58e-08	predicted protein [Nematostella vectensis]
Unigene0012261	207.144	0.2192	-9.88417	0	0	--
Unigene0012262	136.726	0.001	-17.0609	0	0	predicted protein [Nematostella vectensis]
Unigene0012285	18.1925	0.1966	-6.53194	0	0	LAMP family protein C20orf103-like protein [Acromyrmex echinatior]
Unigene0012309	0.53	0.001	-9.04985	0.00782344	0.0109487	elongation factor-1a [Crassostrea nippona]
Unigene0012320	7.666	0.204	-5.23183	5.98e-17	1.68e-16	--
Unigene0012321	4.7239	0.2395	-4.30188	5.34e-12	1.28e-11	--
Unigene0012469	7.8752	0.2205	-5.15847	7.69e-24	2.55e-23	PREDICTED: CTL-like protein 2 isoform X3 [Tribolium castaneum]
Unigene0012471	13.6457	0.274	-5.63813	2.49e-150	2.6e-149	CTL-like protein 2, partial [Zootermopsis nevadensis]
Unigene0012591	1587.75	0.1527	-13.344	0	0	--
Unigene0012592	5.5968	0.001	-12.4504	3.78e-18	1.1e-17	--
Unigene0012646	0.8511	0.001	-9.73318	0.0156414	0.0212459	--
Unigene0012650	0.7991	0.001	-9.64223	0.0156414	0.0212459	--
Unigene0012652	187.787	0.1513	-10.2775	0	0	PREDICTED: multiple inositol polyphosphate phosphatase 1 [Tribolium castaneum]
Unigene0012722	6.8245	0.0981	-6.12033	1.01e-30	3.85e-30	--
Unigene0012783	6.4311	0.2872	-4.48494	2.04e-23	6.72e-23	--
Unigene0012819	5.0223	0.001	-12.2941	3.77e-15	1e-14	--
Unigene0012828	4.9865	0.1559	-4.99933	1.5e-14	3.92e-14	band 7 protein [Lasius niger]
Unigene0012829	14.5423	0.1463	-6.63518	0	0	PREDICTED: band 7 protein AGAP004871 isoform X2 [Strongylocentrotus purpuratus]
Unigene0012830	0.875	0.001	-9.77314	3.85e-06	6.89e-06	Mechanosensory protein 2, partial [Stegodyphus mimosarum]
Unigene0012862	1221.35	0.1109	-13.4269	0	0	--
Unigene0012863	1102.99	0.001	-20.073	0	0	--
Unigene0012864	762.984	0.001	-19.5413	0	0	--
Unigene0012890	1.7932	0.066	-4.76393	1.93e-06	3.51e-06	--
Unigene0012896	5.6732	0.001	-12.4699	2.38e-13	5.99e-13	--
Unigene0012966	63.8877	0.001	-15.9633	0	0	RecName: Full=Blastula protease 10; Flags: Precursor [Paracentrotus lividus]
Unigene0012974	13.7657	0.0989	-7.12089	2.02e-30	7.62e-30	--
Unigene0013010	17.3644	0.2916	-5.896	5.52e-166	6.24e-165	--
Unigene0013079	27.7162	0.2302	-6.9117	0	0	calcitonin-like diuretic hormone A [Amphibalanus amphitrite]
Unigene0013113	1.8757	0.001	-10.8732	3.03e-08	6.12e-08	--
Unigene0013115	11.095	0.1039	-6.73857	1.53e-91	1.11e-90	--
Unigene0013116	1.5969	0.001	-10.6411	9.53e-10	2.07e-09	--
Unigene0013117	4.3852	0.0623	-6.13727	5.1e-31	1.95e-30	--
Unigene0013133	46.3872	0.106	-8.77352	0	0	papilin [Trichuris trichiura]
Unigene0013281	1.9374	0.001	-10.9199	1.93e-06	3.51e-06	--
Unigene0013282	1.3992	0.001	-10.4504	6.14e-05	0.000101469	--
Unigene0013283	0.7534	0.001	-9.55727	0.00782344	0.0109487	--
Unigene0013284	170.704	0.001	-17.3811	0	0	--
Unigene0013285	189.293	0.001	-17.5303	0	0	--
Unigene0013286	57.5312	0.001	-15.8121	1.17e-136	1.13e-135	--
Unigene0013287	4.6281	0.001	-12.1762	4.74e-16	1.3e-15	--
Unigene0013434	982.629	0.2619	-11.8734	0	0	myosin regulatory light chain [Daphnia pulex]
Unigene0013464	1.0256	0.001	-10.0023	0.000489894	0.000754178	--
Unigene0013465	0.6154	0.001	-9.26538	0.0156414	0.0212459	--
Unigene0013552	7.4873	0.001	-12.8702	2.56e-31	9.83e-31	--
Unigene0013555	55.7155	0.1113	-8.96748	0	0	PREDICTED: cuticle protein 19.8-like [Plutella xylostella]
Unigene0013629	5.2051	0.2456	-4.40554	1.52e-17	4.34e-17	--
Unigene0013634	9.9058	0.0254	-8.6073	2.75e-83	1.88e-82	Sarcosine dehydrogenase, mitochondrial, partial [Stegodyphus mimosarum]
Unigene0013760	4.6475	0.001	-12.1822	7.59e-21	2.36e-20	histone H3-1 [Trichomonas vaginalis G3]
Unigene0013761	20.259	0.001	-14.3063	1.32e-98	1.01e-97	histone H3-1 [Trichomonas vaginalis G3]
Unigene0013870	20.5305	0.001	-14.3255	9.6e-80	6.38e-79	--
Unigene0013871	105.6	0.1876	-9.13673	0	0	Protein abrupt [Zootermopsis nevadensis]
Unigene0013877	4.2928	0.001	-12.0677	1.52e-08	3.1e-08	--
Unigene0013885	100.19	0.0471	-11.0547	0	0	hypothetical protein DAPPUDRAFT_306813 [Daphnia pulex]
Unigene0013942	2.7851	0.2049	-3.76474	2.12e-05	3.61e-05	--
Unigene0014041	3.3659	0.001	-11.7168	3.03e-08	6.12e-08	--
Unigene0014042	16.762	0.001	-14.0329	5.75e-54	2.98e-53	--
Unigene0014151	71.0615	0.026	-11.4163	0	0	--
Unigene0014153	24.1946	0.1146	-7.72193	1.23e-45	5.77e-45	--
Unigene0014154	84.3862	0.1929	-8.77301	1.84e-184	2.27e-183	--
Unigene0014155	13.9515	0.2237	-5.96271	1.97e-27	7.02e-27	--
Unigene0014156	17.7769	0.1533	-6.8575	4.22e-50	2.09e-49	--
Unigene0014157	32.6477	0.001	-14.9947	2.17e-61	1.21e-60	--
Unigene0014158	28.9592	0.1215	-7.89692	1.52e-101	1.19e-100	--
Unigene0014159	84.5755	0.1549	-9.09276	7.06e-229	1.04e-227	--
Unigene0014161	72.4765	0.1158	-9.28973	1.57e-261	2.62e-260	--
Unigene0014162	2.7682	0.001	-11.4347	3.85e-06	6.89e-06	--
Unigene0014165	37.1438	0.1238	-8.22897	3.93718594751542e-312	7.68228871984864e-311	Betaine--homocysteine S-methyltransferase 1, partial [Stegodyphus mimosarum]
Unigene0014167	6.0041	0.001	-12.5517	9.47e-13	2.34e-12	--
Unigene0014251	4.0846	0.1648	-4.63141	3e-11	6.96e-11	--
Unigene0014307	6.6508	0.0857	-6.27809	1.04e-33	4.17e-33	--
Unigene0014311	7.8969	0.0809	-6.609	1.17e-42	5.29e-42	--
Unigene0014312	7.6063	0.001	-12.893	7.92e-47	3.77e-46	--
Unigene0014347	19.0585	0.001	-14.2181	1.14e-193	1.47e-192	--
Unigene0014384	1.068	0.001	-10.0607	0.0156414	0.0212459	GI12732 [Drosophila mojavensis]
Unigene0014421	3873.32	0.2067	-14.1937	0	0	--
Unigene0014422	8.1184	0.001	-12.987	6.08e-23	1.98e-22	--
Unigene0014430	1.3989	0.1166	-3.58465	7.68e-05	0.000125849	PREDICTED: endocuticle structural glycoprotein SgAbd-8-like [Atta cephalotes]
Unigene0014498	20.3906	0.001	-14.3156	2.23e-39	9.65e-39	--
Unigene0014500	163.651	0.001	-17.3203	0	0	--
Unigene0014503	6.4794	0.001	-12.6616	3e-17	8.48e-17	--
Unigene0014504	24.2836	0.001	-14.5677	1.88e-55	9.89e-55	--
Unigene0014505	5.5605	0.001	-12.441	1.5e-14	3.92e-14	--
Unigene0014521	0.6254	0.001	-9.28864	0.0312734	0.0412699	--
Unigene0014524	0.634	0.001	-9.30834	0.0312734	0.0412699	--
Unigene0014526	8.0054	0.001	-12.9668	2.41e-22	7.74e-22	--
Unigene0014529	15.1942	0.2568	-5.88673	0	0	PREDICTED: cyclin-dependent kinase 5 activator 1 [Tribolium castaneum]
Unigene0014531	7.7607	0.001	-12.922	5.98e-17	1.68e-16	--
Unigene0014585	2.962	0.2058	-3.84726	1.11e-05	1.92e-05	--
Unigene0014682	2.8831	0.1898	-3.92507	5.78e-06	1.02e-05	--
Unigene0014791	5055	0.2535	-14.2834	0	0	--
Unigene0014792	17.4387	0.001	-14.09	2.15e-69	1.3e-68	--
Unigene0014947	15.0258	0.0519	-8.17749	2.61e-183	3.22e-182	--
Unigene0015007	19.4868	0.001	-14.2502	2.72e-51	1.37e-50	--
Unigene0015008	28.6388	0.081	-8.46583	0	0	spore coat protein SP75 [Polysphondylium pallidum PN500]
Unigene0015071	33.4262	0.001	-15.0287	1.84e-184	2.27e-183	histone h2a [Plasmodium falciparum 3D7]
Unigene0015111	0.9344	0.073	-3.67807	0.00391328	0.00561741	hypothetical protein DAPPUDRAFT_327378 [Daphnia pulex]
Unigene0015194	14.6003	0.2622	-5.79919	0	0	PREDICTED: tetraspanin-7-like [Tribolium castaneum]
Unigene0015289	4.2773	0.0836	-5.67705	1.5e-11	3.54e-11	--
Unigene0015372	6.7916	0.001	-12.7295	3.25e-32	1.27e-31	Actin-2 [Schistosoma japonicum]
Unigene0015454	3.3281	0.0867	-5.26252	7.59e-09	1.58e-08	--
Unigene0015466	22.5192	0.0823	-8.09605	0	0	PREDICTED: glutamate decarboxylase isoform X1 [Athalia rosae]
Unigene0015504	11.8274	0.001	-13.5298	7.13e-63	4.05e-62	--
Unigene0015505	6.4983	0.001	-12.6658	3.77e-15	1e-14	--
Unigene0015522	15.1526	0.001	-13.8873	1.12e-39	4.88e-39	--
Unigene0015523	37.5483	0.2727	-7.10529	2.6e-288	4.71e-287	--
Unigene0015524	24.5393	0.1486	-7.36752	0	0	--
Unigene0015525	26.2653	0.2033	-7.0134	0	0	PREDICTED: high-affinity choline transporter 1 [Bactrocera cucurbitae]
Unigene0015549	3.4847	0.0908	-5.2622	7.59e-09	1.58e-08	--
Unigene0015551	0.8987	0.001	-9.8117	0.0312734	0.0412699	--
Unigene0015634	142.811	0.057	-11.2909	0	0	Pro-resilin [Zootermopsis nevadensis]
Unigene0015635	12.0547	0.001	-13.5573	2.97e-43	1.35e-42	--
Unigene0015636	26.8148	0.001	-14.7107	1.35e-88	9.64e-88	--
Unigene0015637	40.0109	0.001	-15.2881	3.64e-158	3.96e-157	--
Unigene0015640	46.6419	0.001	-15.5093	1.14e-163	1.28e-162	--
Unigene0015641	31.2628	0.001	-14.9322	7.93e-87	5.57e-86	--
Unigene0015667	162.738	0.001	-17.3122	1.57852954223242e-313	3.08982541877863e-312	--
Unigene0015668	130.316	0.001	-16.9917	5.15e-297	9.57e-296	hypothetical protein BRAFLDRAFT_246720 [Branchiostoma floridae]
Unigene0015670	56.999	0.001	-15.7986	3.87e-119	3.39e-118	--
Unigene0015671	182.549	0.001	-17.4779	0	0	hypothetical protein BRAFLDRAFT_246720 [Branchiostoma floridae]
Unigene0015675	8.798	0.1528	-5.84746	2.45e-25	8.38e-25	--
Unigene0015679	313.639	0.1118	-11.454	0	0	--
Unigene0015818	1.5486	0.001	-10.5967	0.000245094	0.000385742	--
Unigene0015865	2.4574	0.001	-11.2629	1.2e-10	2.7e-10	PREDICTED: 28S ribosomal protein S5, mitochondrial [Tribolium castaneum]
Unigene0015919	18.8847	0.1225	-7.26829	1.14e-163	1.28e-162	--
Unigene0015920	16.4906	0.058	-8.15138	3.57e-296	6.62e-295	--
Unigene0016046	2.4587	0.1357	-4.1794	3.96e-11	9.13e-11	--
Unigene0016166	14.2511	0.001	-13.7988	3.35e-35	1.37e-34	--
Unigene0016197	2.4379	0.001	-11.2514	3.85e-06	6.89e-06	--
Unigene0016198	0.983	0.001	-9.94105	0.0156414	0.0212459	--
Unigene0016199	91.0495	0.1113	-9.67605	0	0	--
Unigene0016207	507.79	0.1186	-12.0639	0	0	GJ18328 [Drosophila virilis]
Unigene0016230	8.6566	0.001	-13.0796	1.26e-28	4.59e-28	--
Unigene0016327	30.6105	0.1091	-8.13223	0	0	--
Unigene0016344	6.7855	0.2767	-4.61606	3.33e-15	8.91e-15	--
Unigene0016347	9.4055	0.001	-13.1993	4.81e-22	1.53e-21	--
Unigene0016348	7.885	0.001	-12.9449	2.38e-16	6.57e-16	--
Unigene0016349	4.5623	0.001	-12.1555	3.8e-09	8.05e-09	--
Unigene0016350	28.2634	0.106	-8.05873	0	0	--
Unigene0016391	3.1143	0.001	-11.6047	1.93e-06	3.51e-06	--
Unigene0016442	1.8172	0.071	-4.67775	3.85e-06	6.89e-06	--
Unigene0016497	103.898	0.2713	-8.58106	0	0	Cystathionine beta-synthase [Zootermopsis nevadensis]
Unigene0016602	1.2551	0.2616	-2.26237	0.0127622	0.0174982	--
Unigene0016633	1.5246	0.2043	-2.89967	0.000732495	0.00111306	--
Unigene0016690	10.4371	0.001	-13.3494	3.99e-47	1.91e-46	40S ribosomal protein S12 [Branchiostoma belcheri]
Unigene0016718	231.51	0.001	-17.8207	0	0	--
Unigene0016741	4.6998	0.2867	-4.03499	2.39e-12	5.79e-12	PREDICTED: pro-resilin-like [Apis dorsata]
Unigene0016786	7.0127	0.2453	-4.83735	9.03e-49	4.42e-48	--
Unigene0016903	86.0736	0.001	-16.3933	0	0	--
Unigene0016918	1.5527	0.001	-10.6006	6.14e-05	0.000101469	--
Unigene0016929	2.8585	0.001	-11.481	1.21e-07	2.36e-07	--
Unigene0016984	8.6128	0.2476	-5.1204	5.1e-31	1.95e-30	--
Unigene0017042	2.6809	0.001	-11.3885	4.75e-13	1.18e-12	--
Unigene0017046	4.5395	0.001	-12.1483	2.41e-22	7.74e-22	--
Unigene0017069	2.1878	0.001	-11.0953	6.14e-05	0.000101469	--
Unigene0017075	1.3942	0.001	-10.4452	0.00097925	0.00147092	predicted protein [Nematostella vectensis]
Unigene0017076	513.765	0.001	-18.9707	0	0	predicted protein [Nematostella vectensis]
Unigene0017079	333.164	0.001	-18.3459	0	0	--
Unigene0017081	365.89	0.1435	-11.3161	0	0	--
Unigene0017083	8.1042	0.001	-12.9845	7.53e-18	2.17e-17	predicted protein [Nematostella vectensis]
Unigene0017129	0.5774	0.001	-9.17343	0.00391328	0.00561741	--
Unigene0017139	8.6322	0.2601	-5.05259	1.59e-29	5.92e-29	--
Unigene0017251	4.9573	0.001	-12.2753	3e-11	6.96e-11	--
Unigene0017321	29.7328	0.073	-8.66994	0	0	Monocarboxylate transporter 12 [Lepeophtheirus salmonis]
Unigene0017346	11.7514	0.001	-13.5205	2.45e-25	8.38e-25	--
Unigene0017347	1411.47	0.2121	-12.7002	0	0	--
Unigene0017482	1347.61	0.16	-13.04	0	0	--
Unigene0017551	7.3007	0.001	-12.8338	1.94e-24	6.5e-24	--
Unigene0017552	5.5433	0.001	-12.4365	1.89e-18	5.54e-18	--
Unigene0017553	3.1645	0.001	-11.6278	4.82e-07	9.11e-07	--
Unigene0017555	84.5254	0.001	-16.3671	7.1e-158	7.7e-157	--
Unigene0017556	1.6255	0.001	-10.6667	0.00097925	0.00147092	--
Unigene0017558	0.6986	0.001	-9.44832	0.00782344	0.0109487	--
Unigene0017559	4.5823	0.001	-12.1619	7.59e-09	1.58e-08	--
Unigene0017560	541.096	0.158	-11.7417	0	0	--
Unigene0017561	35.0088	0.001	-15.0954	3.03e-65	1.76e-64	--
Unigene0017562	2.6222	0.001	-11.3566	7.59e-09	1.58e-08	--
Unigene0017563	3.4711	0.001	-11.7612	7.54e-12	1.79e-11	--
Unigene0017564	1210.4	0.2013	-12.5538	0	0	--
Unigene0017565	2.623	0.001	-11.357	3.8e-09	8.05e-09	--
Unigene0017567	411.696	0.0864	-12.2183	0	0	--
Unigene0017584	16.7904	0.2154	-6.28447	1.29e-67	7.65e-67	--
Unigene0017606	1.2904	0.2483	-2.37766	0.00756354	0.0106159	--
Unigene0017754	26.4184	0.1228	-7.74909	7.75e-92	5.66e-91	--
Unigene0017761	3.5313	0.0669	-5.72205	3.78e-12	9.09e-12	PREDICTED: sperm surface protein Sp17-like [Bombyx mori]
Unigene0017828	16.9205	0.2275	-6.21676	2.35e-64	1.35e-63	--
Unigene0017831	8.4898	0.001	-13.0515	2.73e-37	1.15e-36	BCS-4 [Amphibalanus amphitrite]
Unigene0017832	4.1292	0.001	-12.0116	1.2e-10	2.7e-10	BCS-4 [Amphibalanus amphitrite]
Unigene0017925	1.5216	0.001	-10.5714	7.69e-06	1.35e-05	PREDICTED: vesicular glutamate transporter 1-like [Nasonia vitripennis]
Unigene0018008	24.2133	0.001	-14.5635	7.08e-269	1.21e-267	cruzipain [Trypanosoma cruzi]
Unigene0018009	4.0728	0.001	-11.9918	7.54e-12	1.79e-11	--
Unigene0018028	7.4894	0.066	-6.82624	9.72e-25	3.28e-24	--
Unigene0018051	20.7496	0.0405	-9.00095	6.9e-215	9.67e-214	--
Unigene0018070	7.2577	0.2631	-4.78583	4.02e-23	1.31e-22	--
Unigene0018138	1.0472	0.0468	-4.48388	3.07e-05	5.2e-05	--
Unigene0018144	6.9635	0.2135	-5.0275	1.11e-192	1.43e-191	PREDICTED: titin-like isoform X3 [Tribolium castaneum]
Unigene0018283	0.89	0.001	-9.79766	0.0312734	0.0412699	--
Unigene0018292	207.996	0.001	-17.6662	0	0	PREDICTED: early nodulin-75 [Harpegnathos saltator]
Unigene0018448	4.7331	0.2864	-4.04668	1.71e-19	5.14e-19	--
Unigene0018470	936.69	0.1685	-12.4406	0	0	--
Unigene0018508	8.6212	0.001	-13.0737	8.8e-39	3.78e-38	--
Unigene0018571	7.5733	0.001	-12.8867	4.74e-16	1.3e-15	--
Unigene0018580	5.3294	0.2631	-4.34029	4.07e-24	1.36e-23	--
Unigene0018652	4.0273	0.001	-11.9756	6e-11	1.37e-10	PREDICTED: heat shock 70 kDa protein cognate 4-like [Diaphorina citri]
Unigene0018663	9.2226	0.001	-13.171	3.99e-47	1.91e-46	S60 ribosomal protein L36 [Dictyostelium discoideum AX4]
Unigene0018691	3.7312	0.1795	-4.37758	1.57e-08	3.21e-08	PREDICTED: NAD kinase-like isoform X5 [Tribolium castaneum]
Unigene0018712	6.4478	0.1455	-5.46972	6.52e-68	3.88e-67	--
Unigene0018714	7.1511	0.1058	-6.07875	1.02e-58	5.52e-58	--
Unigene0018778	1.4191	0.1613	-3.13716	0.00183717	0.0027032	--
Unigene0018881	814.413	0.2579	-11.6247	0	0	CUB-serine protease [Panulirus argus]
Unigene0018882	416.255	0.0884	-12.2011	0	0	CUB-serine protease [Panulirus argus]
Unigene0018888	0.308	0.001	-8.26679	0.0312734	0.0412699	Multiple PDZ domain protein, partial [Stegodyphus mimosarum]
Unigene0018952	4.8959	0.001	-12.2574	3e-11	6.96e-11	--
Unigene0018963	0.9123	0.1711	-2.41467	2.61e-11	6.07e-11	PREDICTED: microtubule-actin cross-linking factor 1 isoform X6 [Fopius arisanus]
Unigene0018982	5.449	0.1747	-4.96304	2.99e-14	7.76e-14	--
Unigene0019019	12.0763	0.2489	-5.60047	6.47e-32	2.51e-31	--
Unigene0019020	11.2064	0.2061	-5.76483	8.48e-36	3.5e-35	--
Unigene0019024	0.7097	0.001	-9.47107	0.0156414	0.0212459	--
Unigene0019078	10.3851	0.1882	-5.7861	5.1e-48	2.47e-47	--
Unigene0019083	12.0757	0.001	-13.5598	2.22e-77	1.44e-76	hypothetical protein OXYTRI_13058 [Oxytricha trifallax]
Unigene0019084	5.4183	0.001	-12.4036	7.52e-15	1.99e-14	predicted protein [Nematostella vectensis]
Unigene0019086	8.886	0.0579	-7.26183	2.08e-33	8.24e-33	GLP_748_1200_211 [Culex quinquefasciatus]
Unigene0019093	13.9904	0.001	-13.7721	7.48e-167	8.51e-166	CHK1 checkpoint-like protein [Helicoverpa armigera]
Unigene0019094	11.5454	0.001	-13.495	4.02e-30	1.51e-29	BLTX527 [Nephila pilipes]
Unigene0019154	273.814	0.2873	-9.89642	0	0	--
Unigene0019155	197.735	0.0839	-11.2026	0	0	PREDICTED: plasminogen-like [Plutella xylostella]
Unigene0019157	350.602	0.0969	-11.821	0	0	CUB-serine protease [Panulirus argus]
Unigene0019174	0.7811	0.001	-9.60936	0.0312734	0.0412699	--
Unigene0019197	2.8976	0.001	-11.5006	1.93e-06	3.51e-06	--
Unigene0019199	5.6876	0.001	-12.4736	7.53e-18	2.17e-17	PREDICTED: membrane-bound alkaline phosphatase [Bactrocera cucurbitae]
Unigene0019200	84.9508	0.1763	-8.91245	1.17e-300	2.19e-299	Membrane-bound alkaline phosphatase [Zootermopsis nevadensis]
Unigene0019201	33.3886	0.1034	-8.33498	4.26e-69	2.57e-68	PREDICTED: alkaline phosphatase, placental-like [Bactrocera dorsalis]
Unigene0019202	13.1062	0.001	-13.678	9.9e-28	3.55e-27	--
Unigene0019205	9.2102	0.001	-13.169	3e-17	8.48e-17	PREDICTED: membrane-bound alkaline phosphatase [Tribolium castaneum]
Unigene0019207	5.8057	0.001	-12.5033	1.89e-18	5.54e-18	PREDICTED: membrane-bound alkaline phosphatase [Tribolium castaneum]
Unigene0019209	1.4577	0.001	-10.5095	0.000489894	0.000754178	Membrane-bound alkaline phosphatase [Zootermopsis nevadensis]
Unigene0019219	2.1415	0.0705	-4.92485	5.97e-14	1.53e-13	--
Unigene0019324	13.8441	0.001	-13.757	1.59e-29	5.92e-29	--
Unigene0019325	23.8358	0.001	-14.5408	2.72e-51	1.37e-50	GI22314 [Drosophila mojavensis]
Unigene0019326	16.8834	0.001	-14.0433	2.23e-39	9.65e-39	--
Unigene0019327	12.6222	0.001	-13.6237	3.1e-26	1.08e-25	PREDICTED: alkaline phosphatase-like isoform X1 [Acyrthosiphon pisum]
Unigene0019328	40.3909	0.001	-15.3017	1.12e-77	7.32e-77	PREDICTED: alkaline phosphatase-like [Ceratitis capitata]
Unigene0019329	25.2754	0.001	-14.6254	3.6e-63	2.05e-62	--
Unigene0019424	7.1469	0.1241	-5.84774	2.45e-25	8.38e-25	--
Unigene0019544	56.4947	0.001	-15.7858	0	0	--
Unigene0019728	0.9599	0.001	-9.90674	0.00782344	0.0109487	--
Unigene0019749	7.3551	0.078	-6.55913	7.59e-21	2.36e-20	PREDICTED: serine/arginine repetitive matrix protein 1-like [Diaphorina citri]
Unigene0019797	5.7803	0.0977	-5.88664	2.38e-13	5.99e-13	nicotinic acetylcholine receptor subunit beta 1 isoform 1 precursor [Bombyx mori]
Unigene0020270	61.6486	0.0949	-9.34344	0	0	arrestin1 precursor [Dianemobius nigrofasciatus]
Unigene0020281	1.3587	0.0708	-4.26233	0.000122627	0.000197706	--
Unigene0020282	0.8197	0.001	-9.67895	0.0156414	0.0212459	--
Unigene0020316	1.6162	0.1837	-3.13718	0.00183717	0.0027032	--
Unigene0020439	1.481	0.001	-10.5324	0.00097925	0.00147092	--
Unigene0020457	0.9119	0.001	-9.83273	0.0312734	0.0412699	cuticular protein analogous to peritrophins 3-D1 precursor [Tribolium castaneum]
Unigene0020462	59.9854	0.1979	-8.2437	0	0	cuticular protein RR-2 motif 87 [Danaus plexippus]
Unigene0020463	19.8116	0.001	-14.2741	9.18e-42	4.1e-41	--
Unigene0020503	4.7093	0.1015	-5.53596	1.2e-10	2.7e-10	--
Unigene0020557	54.5822	0.0646	-9.72268	0	0	--
Unigene0020578	8.2112	0.1867	-5.4588	1.2e-19	3.62e-19	--
Unigene0020579	1.365	0.001	-10.4147	0.00391328	0.00561741	--
Unigene0020583	6.9634	0.001	-12.7656	1.5e-14	3.92e-14	--
Unigene0020610	146.159	0.0522	-11.4512	0	0	PREDICTED: trypsin-1-like [Solenopsis invicta]
Unigene0020666	2.3561	0.2105	-3.48451	0.000145836	0.000233094	--
Unigene0020700	5.7529	0.1845	-4.9626	2.99e-14	7.76e-14	--
Unigene0020704	54.2761	0.0426	-10.3152	0	0	--
Unigene0020742	5.1492	0.1533	-5.06992	3.77e-15	1e-14	--
Unigene0020761	8.0782	0.001	-12.9798	5.98e-17	1.68e-16	--
Unigene0020771	0.8137	0.001	-9.66835	0.0156414	0.0212459	--
Unigene0020836	3.1888	0.2215	-3.84764	1.11e-05	1.92e-05	--
Unigene0020879	0.6934	0.001	-9.43754	0.000489894	0.000754178	--
Unigene0020906	231.83	0.1616	-10.4864	0	0	PREDICTED: transmembrane protein 2-like [Crassostrea gigas]
Unigene0020918	5.1764	0.2965	-4.12585	2.44e-40	1.07e-39	Fatty-acid amide hydrolase 1 [Crassostrea gigas]
Unigene0020919	5.0157	0.114	-5.45935	1.2e-19	3.62e-19	Amidase [Oesophagostomum dentatum]
Unigene0020922	5.9293	0.1648	-5.16907	2.38e-16	6.57e-16	--
Unigene0020948	263.547	0.001	-18.0077	0	0	--
Unigene0020983	6.1933	0.001	-12.5965	2.38e-16	6.57e-16	--
Unigene0021000	112.823	0.1286	-9.77696	0	0	--
Unigene0021001	121.192	0.1103	-10.1016	0	0	--
Unigene0021003	7.1452	0.001	-12.8028	6.08e-23	1.98e-22	--
Unigene0021025	4.0687	0.1272	-4.9994	1.91e-21	6.02e-21	--
Unigene0021033	26.947	0.2888	-6.54391	0	0	PREDICTED: sonic hedgehog protein A [Athalia rosae]
Unigene0021050	3.6658	0.1146	-4.99945	2.41e-07	4.64e-07	--
Unigene0021121	23.2657	0.001	-14.5059	4.48e-95	3.35e-94	--
Unigene0021139	1.0214	0.001	-9.99633	0.000122627	0.000197706	--
Unigene0021140	1.5823	0.001	-10.6278	4.82e-07	9.11e-07	--
Unigene0021141	1.2498	0.001	-10.2875	0.00391328	0.00561741	--
Unigene0021142	69.4986	0.001	-16.0847	0	0	--
Unigene0021156	52.1535	0.0311	-10.7116	0	0	Transposable element Tc3 transposase, partial [Camponotus floridanus]
Unigene0021199	7.6559	0.2213	-5.1125	1.39e-83	9.57e-83	GL18402 [Drosophila persimilis]
Unigene0021204	2.0195	0.001	-10.9798	0.000122627	0.000197706	--
Unigene0021206	110.189	0.1108	-9.95781	0	0	--
Unigene0021262	0.491	0.001	-8.93958	0.0312734	0.0412699	--
Unigene0021278	7.083	0.001	-12.7901	1.89e-15	5.09e-15	--
Unigene0021285	1.0655	0.1666	-2.67707	0.0117402	0.0161671	--
Unigene0021290	4.7831	0.1108	-5.43192	4.77e-10	1.05e-09	--
Unigene0021318	21.9929	0.1595	-7.10734	0	0	PREDICTED: lachesin isoform X1 [Tribolium castaneum]
Unigene0021394	1.0244	0.001	-10.0006	0.00782344	0.0109487	--
Unigene0021479	1.6356	0.001	-10.6756	0.000245094	0.000385742	--
Unigene0021495	6.0126	0.2638	-4.51047	5.2e-19	1.55e-18	--
Unigene0021504	325.653	0.001	-18.313	0	0	--
Unigene0021505	0.9295	0.001	-9.86031	0.0156414	0.0212459	--
Unigene0021506	56.3635	0.2431	-7.85707	1.11e-195	1.44e-194	--
Unigene0021559	4.602	0.1308	-5.13683	4.74e-16	1.3e-15	--
Unigene0021561	1.3525	0.001	-10.4014	0.00391328	0.00561741	--
Unigene0021574	4.399	0.1146	-5.2625	3e-17	8.48e-17	--
Unigene0021581	1.4744	0.1024	-3.84784	0.00097925	0.00147092	--
Unigene0021622	3.5756	0.1442	-4.63204	3e-11	6.96e-11	--
Unigene0021623	4.6572	0.001	-12.1852	2.99e-14	7.76e-14	--
Unigene0021734	38.2023	0.0736	-9.01974	9.55e-218	1.36e-216	--
Unigene0021735	49.9896	0.1095	-8.83455	3.21e-285	5.77e-284	--
Unigene0021747	19.2211	0.0738	-8.02485	6.87e-219	9.8e-218	--
Unigene0021781	44.7313	0.1949	-7.84241	0	0	taurine transporter [Euphausia superba]
Unigene0021954	4.658	0.1494	-4.96246	2.99e-14	7.76e-14	--
Unigene0021970	0.8774	0.001	-9.77709	0.0312734	0.0412699	--
Unigene0022054	1.424	0.001	-10.4757	0.000245094	0.000385742	--
Unigene0022066	1.7062	0.16	-3.41464	1.06e-05	1.85e-05	A disintegrin and metalloproteinase with thrombospondin motifs 1, partial [Stegodyphus mimosarum]
Unigene0022068	5.0365	0.1702	-4.88712	2.38e-13	5.99e-13	--
Unigene0022071	2.7258	0.001	-11.4125	1.52e-08	3.1e-08	A disintegrin and metalloproteinase with thrombospondin motifs 1, partial [Stegodyphus mimosarum]
Unigene0022074	5.7051	0.2184	-4.70721	4.42e-16	1.21e-15	GG20002 [Drosophila erecta]
Unigene0022100	1.248	0.065	-4.26303	0.000122627	0.000197706	--
Unigene0022146	3.9907	0.2773	-3.84712	1.17e-10	2.65e-10	--
Unigene0022250	2.9365	0.001	-11.5199	3.03e-08	6.12e-08	--
Unigene0022343	3.5431	0.2215	-3.99963	1.57e-06	2.88e-06	RNA-directed DNA polymerase from mobile element jockey, partial [Stegodyphus mimosarum]
Unigene0022345	6.1889	0.1358	-5.51013	1.51e-20	4.67e-20	pol-like protein [Biomphalaria glabrata]
Unigene0022350	3.9569	0.1767	-4.485	4.18e-09	8.81e-09	pol-like protein [Biomphalaria glabrata]
Unigene0022358	1.8766	0.1903	-3.30177	2.57e-10	5.72e-10	PREDICTED: uncharacterized protein LOC103571278 isoform X1 [Microplitis demolitor]
Unigene0022360	8.1812	0.0656	-6.96247	3.93e-27	1.39e-26	--
Unigene0022376	0.3903	0.001	-8.60844	0.00782344	0.0109487	Tyrosine-protein kinase Src42A, partial [Stegodyphus mimosarum]
Unigene0022385	4.9367	0.001	-12.2693	1.2e-10	2.7e-10	--
Unigene0022387	1.1839	0.001	-10.2093	0.000245094	0.000385742	--
Unigene0022423	4.4628	0.001	-12.1237	9.53e-10	2.07e-09	--
Unigene0022425	8.8393	0.001	-13.1097	1.89e-18	5.54e-18	--
Unigene0022446	20.792	0.2398	-6.43805	2.83e-166	3.21e-165	--
Unigene0022457	16.6368	0.001	-14.0221	3.35e-35	1.37e-34	--
Unigene0022520	31.2706	0.001	-14.9325	7.32e-140	7.22e-139	--
Unigene0022521	54.1944	0.2078	-8.0268	0	0	--
Unigene0022588	290.089	0.2248	-10.3336	0	0	--
Unigene0022679	3.619	0.1741	-4.3776	1.57e-08	3.21e-08	--
Unigene0022682	1.8849	0.1684	-3.48452	0.000145836	0.000233094	--
Unigene0022717	26.7066	0.001	-14.7049	1.68e-60	9.32e-60	--
Unigene0022718	129.327	0.1087	-10.2165	0	0	--
Unigene0022719	213.858	0.154	-10.4395	0	0	--
Unigene0022720	274.44	0.001	-18.0661	0	0	--
Unigene0022721	125.666	0.001	-16.9392	1.38e-230	2.05e-229	--
Unigene0022722	11.8959	0.001	-13.5382	7.9e-58	4.25e-57	--
Unigene0022723	33.6689	0.001	-15.0391	1.17e-105	9.44e-105	--
Unigene0022724	23.6194	0.001	-14.5277	1.32e-75	8.42e-75	--
Unigene0022725	0.8949	0.001	-9.80558	0.00391328	0.00561741	--
Unigene0022729	6.9206	0.1082	-5.99912	2.5e-28	9.08e-28	--
Unigene0022731	4.0671	0.2631	-3.95032	2.15e-09	4.6e-09	unnamed protein product [Oikopleura dioica]
Unigene0022733	18.1877	0.1015	-7.48534	8.8e-39	3.78e-38	hypothetical protein IscW_ISCW024385 [Ixodes scapularis]
Unigene0022734	6.8429	0.001	-12.7404	2.39e-19	7.16e-19	unnamed protein product [Oikopleura dioica]
Unigene0022735	62.0169	0.1579	-8.61751	8.51e-247	1.35e-245	unknown [Brugia malayi]
Unigene0022737	2.0859	0.001	-11.0265	3.85e-06	6.89e-06	unnamed protein product [Oikopleura dioica]
Unigene0022739	7.4288	0.1486	-5.64362	7.53e-44	3.46e-43	hypothetical protein CLF_113308 [Clonorchis sinensis]
Unigene0022740	15.6863	0.2029	-6.27259	4.05e-197	5.31e-196	hypothetical protein IscW_ISCW024385 [Ixodes scapularis]
Unigene0022799	7.0497	0.0358	-7.62146	1.17e-42	5.29e-42	Atrial natriuretic peptide receptor A [Harpegnathos saltator]
Unigene0022805	5.6099	0.078	-6.16836	4.74e-16	1.3e-15	PREDICTED: atrial natriuretic peptide receptor 2-like [Athalia rosae]
Unigene0022816	4.079	0.2943	-3.79286	1.57e-08	3.21e-08	--
Unigene0022833	0.8781	0.001	-9.77824	0.0156414	0.0212459	--
Unigene0022835	56.4592	0.1172	-8.91209	0	0	--
Unigene0022836	35.3742	0.001	-15.1104	7.72e-102	6.06e-101	--
Unigene0022837	5.4285	0.001	-12.4063	5.97e-14	1.53e-13	--
Unigene0022839	8.1236	0.001	-12.9879	3.78e-18	1.1e-17	--
Unigene0022883	1.5644	0.0815	-4.26267	1.14e-07	2.23e-07	GJ19935 [Drosophila virilis]
Unigene0022930	1.1349	0.001	-10.1483	0.00391328	0.00561741	--
Unigene0022963	3.6691	0.001	-11.8412	6.05e-08	1.2e-07	--
Unigene0023038	1.3601	0.2835	-2.26229	0.0225028	0.0301847	--
Unigene0023044	21.638	0.001	-14.4013	1.57e-46	7.45e-46	--
Unigene0023045	46.3748	0.001	-15.5011	3.73e-126	3.41e-125	--
Unigene0023047	1.9856	0.001	-10.9554	3.85e-06	6.89e-06	--
Unigene0023048	158.523	0.1007	-10.6204	0	0	--
Unigene0023049	39.7564	0.001	-15.2789	7.21e-133	6.83e-132	--
Unigene0023050	39.8883	0.001	-15.2837	1.17e-136	1.13e-135	--
Unigene0023094	1.63	0.001	-10.6707	3.07e-05	5.2e-05	--
Unigene0023106	138.904	0.001	-17.0837	0	0	--
Unigene0023113	1.424	0.001	-10.4757	0.00097925	0.00147092	--
Unigene0023153	50.0935	0.0084	-12.5419	0	0	PREDICTED: muscle M-line assembly protein unc-89 isoform X1 [Linepithema humile]
Unigene0023205	6.8651	0.2894	-4.56814	6.79e-30	2.54e-29	--
Unigene0023246	0.8851	0.001	-9.7897	0.0156414	0.0212459	--
Unigene0023292	1.9889	0.001	-10.9578	6.14e-05	0.000101469	--
Unigene0023294	0.8377	0.001	-9.71029	0.0312734	0.0412699	--
Unigene0023366	27.328	0.001	-14.7381	1.82e-63	1.04e-62	--
Unigene0023367	0.8868	0.001	-9.79246	0.000122627	0.000197706	--
Unigene0023368	692.427	0.001	-19.4013	0	0	--
Unigene0023369	4383.83	0.2375	-14.172	0	0	PREDICTED: pupal cuticle protein Edg-78E-like [Ceratitis capitata]
Unigene0023370	9.0165	0.001	-13.1384	1.3e-48	6.32e-48	--
Unigene0023371	53.6356	0.001	-15.7109	8.99e-143	9e-142	--
Unigene0023372	236.911	0.001	-17.854	0	0	--
Unigene0023373	0.4452	0.001	-8.79831	0.0156414	0.0212459	--
Unigene0023374	2.7694	0.001	-11.4354	2.38e-16	6.57e-16	--
Unigene0023375	46.4409	0.001	-15.5031	6.71e-99	5.16e-98	--
Unigene0023398	52.8929	0.1169	-8.82166	0	0	--
Unigene0023404	34.1882	0.1121	-8.25257	0	0	--
Unigene0023443	1.2466	0.001	-10.2838	0.000489894	0.000754178	--
Unigene0023458	2.2378	0.1908	-3.55195	4.24e-07	8.05e-07	--
Unigene0023477	2.8002	0.0648	-5.43339	4.77e-10	1.05e-09	--
Unigene0023490	3.3027	0.001	-11.6894	9.64e-07	1.79e-06	--
Unigene0023491	20.579	0.2154	-6.57801	4.17e-82	2.83e-81	--
Unigene0023493	22.9867	0.001	-14.4885	2.27e-95	1.71e-94	--
Unigene0023494	11.712	0.0787	-7.21741	1.63e-32	6.4e-32	--
Unigene0023495	47.0617	0.1277	-8.52565	0	0	--
Unigene0023568	1.39	0.001	-10.4409	0.000245094	0.000385742	--
Unigene0023578	441.456	0.226	-10.9317	0	0	AGAP004570-PA [Anopheles gambiae str. PEST]
Unigene0023602	4.0027	0.0626	-5.99867	2.99e-14	7.76e-14	--
Unigene0023618	0.903	0.001	-9.81858	0.0312734	0.0412699	--
Unigene0023620	2.1057	0.1097	-4.26266	0.000122627	0.000197706	--
Unigene0023622	0.3695	0.001	-8.52943	0.0312734	0.0412699	--
Unigene0023644	9.7069	0.2312	-5.3918	1.55e-73	9.72e-73	PREDICTED: 40S ribosomal protein S5 [Ceratosolen solmsi marchali]
Unigene0023716	50.4672	0.001	-15.6231	1.62e-144	1.63e-143	--
Unigene0023719	50.7054	0.001	-15.6299	1.17e-136	1.13e-135	--
Unigene0023720	53.4666	0.2354	-7.82738	1.62e-144	1.63e-143	--
Unigene0023721	19.0414	0.001	-14.2169	2.73e-37	1.15e-36	--
Unigene0023723	37.2848	0.001	-15.1863	1.98e-97	1.51e-96	--
Unigene0023760	1.4943	0.2076	-2.84759	0.00636217	0.00899314	--
Unigene0023787	1.7141	0.2144	-2.99907	0.0034275	0.00495159	--
Unigene0023792	1.0998	0.001	-10.103	0.0156414	0.0212459	--
Unigene0023826	41.7516	0.001	-15.3495	2.3e-90	1.66e-89	--
Unigene0023827	444.015	0.001	-18.7603	0	0	--
Unigene0023828	144.517	0.0934	-10.5955	8.46334451326055e-321	1.69242186982919e-319	--
Unigene0023829	11.9787	0.001	-13.5482	7.82e-27	2.75e-26	--
Unigene0023830	76.954	0.1135	-9.40516	1.2e-143	1.21e-142	--
Unigene0023831	5.4303	0.001	-12.4068	7.54e-12	1.79e-11	--
Unigene0023832	21.653	0.001	-14.4023	4.84e-45	2.26e-44	--
Unigene0023833	1558.03	0.2921	-12.381	0	0	Nuclear transcription factor Y subunit alpha [Crassostrea gigas]
Unigene0023835	275.567	0.001	-18.072	0	0	--
Unigene0024063	1.1177	0.001	-10.1263	0.00391328	0.00561741	--
Unigene0024065	1.748	0.0994	-4.13632	0.000245094	0.000385742	--
Unigene0024066	0.9494	0.001	-9.89087	0.000489894	0.000754178	pacifastin light chain [Anopheles sinensis]
Unigene0024067	21.4862	0.001	-14.3911	6.35e-173	7.45e-172	--
Unigene0024068	1.5891	0.001	-10.634	0.000489894	0.000754178	--
Unigene0024077	2.8352	0.001	-11.4692	3.85e-06	6.89e-06	--
Unigene0024114	6.8761	0.001	-12.7474	3.78e-18	1.1e-17	--
Unigene0024115	8.9371	0.001	-13.1256	2.56e-31	9.83e-31	--
Unigene0024118	2.3213	0.1452	-3.99882	1.57e-06	2.88e-06	ORF91 [Caligus rogercresseyi]
Unigene0024120	5.4563	0.001	-12.4137	7.52e-15	1.99e-14	UNKNOWN [Stylonychia lemnae]
Unigene0024121	9.0969	0.0725	-6.97125	5.75e-54	2.98e-53	UNKNOWN [Stylonychia lemnae]
Unigene0024123	2.1978	0.001	-11.1018	6.14e-05	0.000101469	hypothetical protein CRE_03576 [Caenorhabditis remanei]
Unigene0024126	3.5262	0.001	-11.7839	4.82e-07	9.11e-07	--
Unigene0024136	3.4149	0.2248	-3.92513	5.78e-06	1.02e-05	--
Unigene0024167	3.5544	0.001	-11.7954	1.52e-08	3.1e-08	--
Unigene0024173	1.5868	0.1102	-3.84792	0.00097925	0.00147092	--
Unigene0024279	87.0881	0.1731	-8.97473	0	0	--
Unigene0024330	3.1888	0.2215	-3.84764	1.11e-05	1.92e-05	--
Unigene0024331	4.2353	0.001	-12.0482	6e-11	1.37e-10	--
Unigene0024333	1.7932	0.001	-10.8083	3.85e-06	6.89e-06	--
Unigene0024338	1.4323	0.1791	-2.9995	1.06e-05	1.85e-05	--
Unigene0024340	10.5597	0.2476	-5.41441	4.78e-56	2.53e-55	--
Unigene0024342	0.8108	0.001	-9.6632	0.000122627	0.000197706	--
Unigene0024343	2.5581	0.1684	-3.92511	1.68e-11	3.94e-11	--
Unigene0024344	0.6691	0.001	-9.38608	0.00097925	0.00147092	--
Unigene0024355	2.4781	0.1823	-3.76485	2.12e-05	3.61e-05	--
Unigene0024435	1.927	0.001	-10.9121	3.07e-05	5.2e-05	--
Unigene0024439	24.7981	0.001	-14.5979	1.01e-97	7.69e-97	--
Unigene0024440	2.5918	0.001	-11.3397	1.21e-07	2.36e-07	--
Unigene0024441	1.811	0.1258	-3.84758	1.11e-05	1.92e-05	--
Unigene0024443	1.0204	0.001	-9.99492	0.00782344	0.0109487	--
Unigene0024446	21.5447	0.001	-14.395	1.57e-46	7.45e-46	--
Unigene0024471	1.7177	0.001	-10.7463	1.93e-06	3.51e-06	--
Unigene0024515	4.5483	0.2495	-4.18822	9.08e-18	2.6e-17	--
Unigene0024535	10.4841	0.001	-13.3559	1.75e-38	7.49e-38	--
Unigene0024537	10.8822	0.001	-13.4097	4.02e-87	2.84e-86	PREDICTED: general transcriptional corepressor trfA-like [Megachile rotundata]
Unigene0024604	0.9743	0.0762	-3.6765	0.00391328	0.00561741	--
Unigene0024637	2.0482	0.2956	-2.79264	0.0023592	0.00344635	--
Unigene0024654	3.5601	0.2226	-3.99939	1.25e-18	3.66e-18	--
Unigene0024821	0.6781	0.001	-9.40535	0.0312734	0.0412699	PREDICTED: protein HID1-like isoformX1 [Apis mellifera]
Unigene0024912	2.6519	0.0638	-5.37733	1.9e-09	4.08e-09	Fibrillin-2 [Camponotus floridanus]
Unigene0024922	3.7025	0.1007	-5.20036	1.52e-08	3.1e-08	dumpy, isoform W [Drosophila melanogaster]
Unigene0024978	3.9238	0.2516	-3.96305	8.77e-12	2.08e-11	--
Unigene0024982	4.6826	0.001	-12.1931	3.77e-15	1e-14	--
Unigene0024983	11.1612	0.2684	-5.37796	1.08e-36	4.5e-36	--
Unigene0024985	0.5586	0.0582	-3.26272	6.66e-05	0.000109855	--
Unigene0025045	1.2604	0.197	-2.67761	0.0117402	0.0161671	--
Unigene0025048	1.043	0.001	-10.0265	0.00391328	0.00561741	--
Unigene0025100	1.4295	0.001	-10.4813	0.000489894	0.000754178	--
Unigene0025103	115.385	0.1767	-9.35094	0	0	--
Unigene0025106	2.0734	0.001	-11.0178	3.07e-05	5.2e-05	--
Unigene0025107	1.4595	0.001	-10.5113	9.64e-07	1.79e-06	PREDICTED: transmembrane protein 2-like [Crassostrea gigas]
Unigene0025109	0.8084	0.001	-9.65893	0.0312734	0.0412699	--
Unigene0025408	2.6368	0.1374	-4.26233	1.14e-07	2.23e-07	--
Unigene0025553	12.4959	0.001	-13.6092	2.73e-37	1.15e-36	PREDICTED: alkaline phosphatase 4 [Apis florea]
Unigene0025555	0.8415	0.001	-9.71682	0.0312734	0.0412699	PREDICTED: membrane-bound alkaline phosphatase [Tribolium castaneum]
Unigene0025556	28.4559	0.2022	-7.1368	8.5e-61	4.72e-60	PREDICTED: alkaline phosphatase 4 [Fopius arisanus]
Unigene0025557	71.0528	0.001	-16.1166	2.29e-136	2.21e-135	--
Unigene0025559	0.8746	0.001	-9.77248	0.0156414	0.0212459	Membrane-bound alkaline phosphatase [Zootermopsis nevadensis]
Unigene0025560	106.778	0.0689	-10.5978	4.23414258485948e-321	8.48557746732341e-320	PREDICTED: alkaline phosphatase-like, partial [Athalia rosae]
Unigene0025561	116.512	0.2344	-8.95729	0	0	GK16879 [Drosophila willistoni]
Unigene0025562	90.2737	0.2526	-8.48131	0	0	PREDICTED: alkaline phosphatase-like [Ceratitis capitata]
Unigene0025563	1.5811	0.001	-10.6267	0.000122627	0.000197706	PREDICTED: alkaline phosphatase-like [Ceratitis capitata]
Unigene0025564	5.7515	0.1124	-5.67722	1.5e-11	3.54e-11	PREDICTED: membrane-bound alkaline phosphatase [Musca domestica]
Unigene0025565	2.2387	0.001	-11.1284	6.14e-05	0.000101469	PREDICTED: alkaline phosphatase-like [Bombus terrestris]
Unigene0025566	38.1978	0.2095	-7.5104	5.69e-78	3.73e-77	alkaline phosphatase 1 [Aphis glycines]
Unigene0025567	11.8759	0.001	-13.5357	1.53e-23	5.05e-23	Alkaline phosphatase, tissue-nonspecific isozyme, partial [Stegodyphus mimosarum]
Unigene0025680	13.5373	0.001	-13.7247	9.6e-80	6.38e-79	variant SH3 domain protein [Dictyocaulus viviparus]
Unigene0025712	7.0567	0.2865	-4.62239	9.03e-26	3.12e-25	variant SH3 domain protein [Dictyocaulus viviparus]
Unigene0025761	2.8898	0.001	-11.4968	3.85e-06	6.89e-06	--
Unigene0025762	0.8815	0.001	-9.78382	0.0312734	0.0412699	--
Unigene0025767	1.2767	0.001	-10.3182	0.00097925	0.00147092	--
Unigene0025800	2551.51	0.001	-21.2829	0	0	circadian clock protein period [Bulla gouldiana]
Unigene0025801	614.194	0.001	-19.2283	0	0	--
Unigene0025807	241.457	0.0863	-11.4501	0	0	PREDICTED: uncharacterized protein LOC103570165 [Microplitis demolitor]
Unigene0025812	6.7832	0.001	-12.7278	4.88e-25	1.66e-24	--
Unigene0025813	3.4252	0.001	-11.742	1.21e-07	2.36e-07	--
Unigene0025831	8.474	0.001	-13.0488	1.21e-22	3.92e-22	--
Unigene0025842	4.5968	0.1045	-5.45906	1.2e-19	3.62e-19	--
Unigene0025868	4.6046	0.1175	-5.29234	1.5e-17	4.29e-17	--
Unigene0025872	6.1837	0.145	-5.41435	1.26e-28	4.59e-28	--
Unigene0025890	4.3372	0.1323	-5.03488	7.52e-15	1.99e-14	--
Unigene0025902	3.5831	0.001	-11.807	1.2e-10	2.7e-10	chaperonin GroEL, partial [Strigomonas culicis]
Unigene0025904	11.859	0.001	-13.5337	5.13e-59	2.79e-58	--
Unigene0025914	3.5482	0.0965	-5.20041	1.52e-08	3.1e-08	--
Unigene0025922	3.0646	0.0782	-5.29239	1.5e-17	4.29e-17	--
Unigene0025924	15.0963	0.001	-13.8819	3.74e-79	2.48e-78	Ac1147-like protein, partial [Diaphorina citri]
Unigene0025932	4.1942	0.2713	-3.95043	4.69e-18	1.35e-17	voltage-dependent p/q type calcium channel [Culex quinquefasciatus]
Unigene0025935	2.4566	0.2194	-3.48503	0.000145836	0.000233094	--
Unigene0025936	21.8137	0.0178	-10.2591	0	0	--
Unigene0025937	3.8568	0.1929	-4.32148	5.88e-08	1.17e-07	PREDICTED: LOW QUALITY PROTEIN: 40S ribosomal protein S15 [Musca domestica]
Unigene0025983	5.5293	0.2626	-4.39616	2.82e-25	9.64e-25	--
Unigene0025984	3.7781	0.27	-3.80663	2.23e-10	5e-10	IP14892p [Drosophila melanogaster]
Unigene0025990	4.6095	0.001	-12.1704	6e-11	1.37e-10	DEAD/DEAH box helicase [Dictyocaulus viviparus]
Unigene0026013	6.1708	0.1043	-5.88665	3.1e-26	1.08e-25	--
Unigene0026026	5.2665	0.1996	-4.72166	6.03e-22	1.92e-21	--
Unigene0026036	4.6041	0.001	-12.1687	5.98e-17	1.68e-16	hydroxymethyltransferase [Naegleria gruberi]
Unigene0026056	5.9867	0.2228	-4.74794	1.26e-55	6.67e-55	Shaw potassium channel [Panulirus interruptus]
Unigene0026059	3.214	0.001	-11.6502	7.59e-09	1.58e-08	--
Unigene0026068	4.577	0.001	-12.1602	2.39e-19	7.16e-19	60S ribosomal protein [Phragmatopoma lapidosa]
Unigene0026070	2.6238	0.2734	-3.26257	6.66e-05	0.000109855	--
Unigene0026088	4.2488	0.1898	-4.4845	1.02e-18	3.01e-18	catalase isozyme 2 [Capsaspora owczarzaki ATCC 30864]
Unigene0026106	5.6069	0.001	-12.453	3.02e-20	9.23e-20	PREDICTED: transcription factor BTF3 homolog 4 [Strongylocentrotus purpuratus]
Unigene0026120	5.2681	0.232	-4.50509	1.04e-23	3.43e-23	--
Unigene0026131	5.9298	0.1809	-5.03472	7.52e-15	1.99e-14	--
Unigene0026144	4.1976	0.001	-12.0353	5.97e-14	1.53e-13	no-mechanoreceptor potential a [Culex quinquefasciatus]
Unigene0026159	3.099	0.001	-11.5976	9.64e-07	1.79e-06	--
Unigene0026161	2.5869	0.1011	-4.67737	3.85e-06	6.89e-06	--
Unigene0026168	2.5041	0.001	-11.2901	3.07e-05	5.2e-05	--
Unigene0026175	1.2594	0.0787	-4.00023	0.000489894	0.000754178	--
Unigene0026177	6.0616	0.001	-12.5655	4.75e-13	1.18e-12	--
Unigene0026188	4.8191	0.001	-12.2345	1.5e-14	3.92e-14	--
Unigene0026195	4.658	0.001	-12.1855	5.97e-14	1.53e-13	--
Unigene0026201	6.4997	0.1452	-5.48426	2.23e-39	9.65e-39	--
Unigene0026214	6.5113	0.0798	-6.35041	3.78e-18	1.1e-17	--
Unigene0026218	4.9603	0.2215	-4.48505	4.18e-09	8.81e-09	--
Unigene0026223	3.1154	0.1498	-4.37831	1.57e-08	3.21e-08	--
Unigene0026231	4.5367	0.183	-4.63173	3e-11	6.96e-11	--
Unigene0026233	4.4532	0.001	-12.1206	1.89e-12	4.61e-12	--
Unigene0026240	10.9407	0.0834	-7.03544	1.22e-56	6.48e-56	--
Unigene0026251	4.9105	0.2456	-4.32149	1.15e-16	3.2e-16	--
Unigene0026268	3.0854	0.1754	-4.13674	4.24e-07	8.05e-07	--
Unigene0026269	6.5338	0.001	-12.6737	9.5e-19	2.8e-18	--
Unigene0026270	5.674	0.001	-12.4702	1.51e-20	4.67e-20	UNVERIFIED: ribosomal protein L27e, partial [Mytilus trossulus]
Unigene0026277	5.734	0.001	-12.4853	1.89e-12	4.61e-12	kinetoplastid membrane protein KMP-11 [Trypanosoma grayi]
Unigene0026279	3.817	0.001	-11.8982	1.2e-10	2.7e-10	--
Unigene0026288	4.7693	0.001	-12.2196	2.38e-13	5.99e-13	Fructose-bisphosphate aldolase , related [Eimeria acervulina]
Unigene0026313	4.2251	0.139	-4.92583	5.97e-14	1.53e-13	--
Unigene0026320	3.5936	0.2043	-4.13667	7.72e-11	1.76e-10	AAEL000700-PA [Aedes aegypti]
Unigene0026321	4.2544	0.001	-12.0547	4.75e-13	1.18e-12	--
Unigene0026324	3.619	0.001	-11.8214	3.8e-09	8.05e-09	--
Unigene0026328	2.748	0.2713	-3.34042	3.62e-05	6.11e-05	--
Unigene0026334	3.1479	0.0937	-5.0702	6.05e-08	1.2e-07	PREDICTED: ensconsin-like isoform X7 [Crassostrea gigas]
Unigene0026335	3.2122	0.001	-11.6493	9.64e-07	1.79e-06	--
Unigene0026342	2.7091	0.1129	-4.5847	6e-11	1.37e-10	--
Unigene0026348	3.3984	0.1118	-4.92586	4.82e-07	9.11e-07	--
Unigene0026363	5.3797	0.1319	-5.35001	1.89e-18	5.54e-18	--
Unigene0026364	4.7862	0.2259	-4.40512	1.52e-17	4.34e-17	--
Unigene0026367	4.6117	0.001	-12.1711	1.89e-12	4.61e-12	iff-1 [Pristionchus pacificus]
Unigene0026368	3.1591	0.001	-11.6253	7.59e-09	1.58e-08	--
Unigene0026380	3.4304	0.074	-5.53471	1.2e-10	2.7e-10	--
Unigene0026382	9.188	0.001	-13.1655	6.67e-35	2.71e-34	PREDICTED: 40S ribosomal protein S20 [Bactrocera dorsalis]
Unigene0026441	3.8747	0.001	-11.9199	9.47e-13	2.34e-12	hypothetical protein X777_00562 [Cerapachys biroi]
Unigene0026443	4.4879	0.001	-12.1318	3e-11	6.96e-11	serine protease [Culex quinquefasciatus]
Unigene0026445	4.2818	0.0787	-5.76571	1.89e-12	4.61e-12	PREDICTED: microtubule-associated protein tau isoform X3 [Tribolium castaneum]
Unigene0026455	2.9412	0.001	-11.5222	3.85e-06	6.89e-06	--
Unigene0026468	4.0982	0.001	-12.0008	2.39e-10	5.34e-10	--
Unigene0026472	3.441	0.0861	-5.32067	3.8e-09	8.05e-09	--
Unigene0026475	4.9705	0.1269	-5.29163	1.5e-17	4.29e-17	--
Unigene0026478	3.355	0.2997	-3.48472	3.76e-08	7.54e-08	PREDICTED: cadherin-related tumor suppressor-like [Musca domestica]
Unigene0026481	3.9532	0.2412	-4.03472	2.39e-12	5.79e-12	PREDICTED: serine--glyoxylate aminotransferase-like [Amphimedon queenslandica]
Unigene0026483	2.7426	0.2572	-3.41458	1.06e-05	1.85e-05	Transposable element P transposase, partial [Stegodyphus mimosarum]
Unigene0026489	4.7035	0.1508	-4.96303	2.99e-14	7.76e-14	--
Unigene0026492	7.405	0.0827	-6.48447	1.2e-19	3.62e-19	--
Unigene0026494	4.2037	0.001	-12.0374	3.8e-09	8.05e-09	--
Unigene0026496	2.4775	0.2582	-3.26232	6.66e-05	0.000109855	Hypothetical protein CBG13888 [Caenorhabditis briggsae]
Unigene0026498	4.7804	0.0586	-6.35009	3.78e-18	1.1e-17	Regulator of chromosome condensation [Zootermopsis nevadensis]
Unigene0026499	4.9023	0.001	-12.2592	2.38e-13	5.99e-13	--
Unigene0026509	4.5337	0.001	-12.1465	1.2e-10	2.7e-10	--
Unigene0026518	3.0225	0.001	-11.5615	4.82e-07	9.11e-07	--
Unigene0026532	3.4472	0.1597	-4.43199	8.1e-09	1.68e-08	light harvesting complex protein LHCII-3 [Gymnochlora stellata]
Unigene0026548	4.1772	0.2375	-4.13654	1.28e-14	3.35e-14	Amidase domain containing protein [Haemonchus contortus]
Unigene0026549	4.5337	0.001	-12.1465	5.98e-17	1.68e-16	cathepsin L isotype 3 [Trypanoplasma borreli]
Unigene0026551	2.8027	0.2767	-3.34042	3.62e-05	6.11e-05	--
Unigene0026552	4.1779	0.001	-12.0286	2.39e-10	5.34e-10	THAP domain-containing protein 9 [Crassostrea gigas]
Unigene0026559	5.7626	0.001	-12.4925	2.99e-14	7.76e-14	--
Unigene0026569	6.3021	0.001	-12.6216	2.39e-19	7.16e-19	--
Unigene0026572	7.598	0.0754	-6.65491	2.41e-22	7.74e-22	--
Unigene0026581	7.0471	0.2098	-5.06994	1.21e-22	3.92e-22	--
Unigene0026599	3.6753	0.2553	-3.8476	8.1e-09	1.68e-08	--
Unigene0026615	3.967	0.1837	-4.43262	8.1e-09	1.68e-08	--
Unigene0026616	10.4394	0.001	-13.3498	2.72e-51	1.37e-50	putative RNA polymerase subunit LEF-4 [Chelonus inanitus]
Unigene0026640	4.5523	0.0949	-5.58404	6e-11	1.37e-10	--
Unigene0026650	5.8666	0.001	-12.5183	4.74e-16	1.3e-15	--
Unigene0026654	3.8017	0.001	-11.8924	3.03e-08	6.12e-08	AAEL005745-PA, partial [Aedes aegypti]
Unigene0026655	4.1139	0.001	-12.0063	3.03e-08	6.12e-08	nicotinic acetylcholine receptor alpha6 subunit isoform 3 precursor [Tribolium castaneum]
Unigene0026658	4.2773	0.001	-12.0625	3e-11	6.96e-11	--
Unigene0026670	5.6719	0.001	-12.4696	9.47e-13	2.34e-12	--
Unigene0026675	3.7886	0.001	-11.8874	6.05e-08	1.2e-07	--
Unigene0026692	1.9906	0.001	-10.959	7.69e-06	1.35e-05	PREDICTED: fatty-acid amide hydrolase 1-like [Saccoglossus kowalevskii]
Unigene0026699	4.6026	0.1919	-4.58402	6.52e-15	1.73e-14	PREDICTED: serine-enriched protein isoform X3 [Vollenhovia emeryi]
Unigene0026700	6.2494	0.1475	-5.40493	4.77e-19	1.42e-18	PREDICTED: LOW QUALITY PROTEIN: D-3-phosphoglycerate dehydrogenase [Solenopsis invicta]
Unigene0026706	3.4765	0.001	-11.7634	4.82e-07	9.11e-07	--
Unigene0026707	3.8092	0.001	-11.8953	7.59e-09	1.58e-08	--
Unigene0026708	3.9145	0.001	-11.9346	1.52e-08	3.1e-08	vitellogenin 1 [Lepeophtheirus salmonis]
Unigene0026715	4.012	0.0717	-5.8062	9.47e-13	2.34e-12	Choline transporter-like protein 1 [Zootermopsis nevadensis]
Unigene0026724	5.0571	0.001	-12.3041	4.77e-10	1.05e-09	--
Unigene0026729	4.7066	0.0981	-5.58429	6e-11	1.37e-10	glutamine synthetase [Acanthamoeba castellanii str. Neff]
Unigene0026736	3.8156	0.001	-11.8977	9.53e-10	2.07e-09	--
Unigene0026746	6.6313	0.1152	-5.84708	2.45e-25	8.38e-25	--
Unigene0026747	6.8911	0.2921	-4.5602	1.35e-19	4.06e-19	--
Unigene0026748	4.0447	0.001	-11.9818	3.8e-09	8.05e-09	heat shock protein 70 [Rhynchopus sp. ATCC 50230]
Unigene0026754	3.9625	0.001	-11.9522	3e-11	6.96e-11	--
Unigene0026764	6.7084	0.1613	-5.37815	9.5e-19	2.8e-18	--
Unigene0026772	4.1494	0.001	-12.0187	3.8e-09	8.05e-09	RecName: Full=Foot protein 1 variant 1; Flags: Precursor [Perna viridis]
Unigene0026780	3.2946	0.1962	-4.06971	8.16e-07	1.52e-06	--
Unigene0026781	5.1523	0.1498	-5.10411	1.89e-15	5.09e-15	--
Unigene0026798	2.6784	0.0985	-4.7651	1.93e-06	3.51e-06	--
Unigene0026810	2.4878	0.001	-11.2807	3.85e-06	6.89e-06	choline o-acyltransferase [Anopheles darlingi]
Unigene0026814	36.1401	0.017	-11.0539	0	0	DNA polymerase delta catalytic subunit [Tenodera aridifolia]
Unigene0026822	4.7995	0.1072	-5.48451	3.02e-20	9.23e-20	--
Unigene0026824	4.9089	0.001	-12.2612	1.51e-20	4.67e-20	--
Unigene0026836	4.3951	0.1666	-4.72144	3.78e-12	9.09e-12	--
Unigene0026842	13.6624	0.0166	-9.68481	0	0	--
Unigene0026854	8.2278	0.2189	-5.23216	2.08e-33	8.24e-33	--
Unigene0026855	5.2893	0.2067	-4.67747	7.54e-12	1.79e-11	PREDICTED: insulin-like growth factor-binding protein complex acid labile subunit isoform X2 [Vollenhovia emeryi]
Unigene0026882	3.9726	0.001	-11.9559	7.59e-09	1.58e-08	--
Unigene0026908	8.2278	0.21	-5.29205	6.67e-35	2.71e-34	bursicon-alpha [Amphibalanus amphitrite]
Unigene0026910	4.492	0.001	-12.1331	7.54e-12	1.79e-11	--
Unigene0026922	4.7429	0.287	-4.04665	5.7e-10	1.25e-09	--
Unigene0026928	4.1139	0.1029	-5.32119	3.8e-09	8.05e-09	--
Unigene0026938	5.2452	0.1929	-4.76507	7.91e-23	2.57e-22	--
Unigene0026941	3.0102	0.001	-11.5556	4.82e-07	9.11e-07	phosphoenolpyruvate carboxykinase [Diplonema papillatum]
Unigene0026946	2.9466	0.2403	-3.61614	2.2e-07	4.23e-07	--
Unigene0026954	8.2071	0.001	-13.0027	2.02e-30	7.62e-30	--
Unigene0026971	5.392	0.001	-12.3966	7.59e-21	2.36e-20	--
Unigene0026974	0.9722	0.001	-9.92511	0.000122627	0.000197706	40S ribosomal protein S24 [Saccoglossus kowalevskii]
Unigene0026975	1.2767	0.001	-10.3182	3.85e-06	6.89e-06	40S ribosomal protein S24 [Saccoglossus kowalevskii]
Unigene0026982	6.6366	0.0728	-6.51036	1.12e-39	4.88e-39	--
Unigene0026991	3.4156	0.001	-11.7379	7.59e-09	1.58e-08	--
Unigene0026993	3.3887	0.2354	-3.84755	8.1e-09	1.68e-08	--
Unigene0026999	7.4418	0.001	-12.8614	2.5e-28	9.08e-28	PREDICTED: 40S ribosomal protein S26-like [Hydra vulgaris]
Unigene0027009	2.8926	0.1809	-3.9991	1.57e-06	2.88e-06	--
Unigene0027011	3.5726	0.2031	-4.13671	4.24e-07	8.05e-07	--
Unigene0027017	3.2873	0.001	-11.6827	9.64e-07	1.79e-06	ferredoxin-NADP oxidoreductase [Bigelowiella natans]
Unigene0027024	3.3554	0.217	-3.95072	2.15e-09	4.6e-09	24-dehydrocholesterol reductase [Daphnia pulex]
Unigene0027028	5.8812	0.001	-12.5219	1.89e-15	5.09e-15	hypothetical protein DAPPUDRAFT_118838 [Daphnia pulex]
Unigene0027030	6.9819	0.001	-12.7694	2.64e-34	1.06e-33	--
Unigene0027034	3.0151	0.001	-11.558	7.59e-09	1.58e-08	--
Unigene0027036	1.7088	0.2375	-2.84698	6.66e-05	0.000109855	pol-like protein [Biomphalaria glabrata]
Unigene0027048	4.6572	0.2184	-4.41442	3.67e-13	9.17e-13	--
Unigene0027053	4.2436	0.1327	-4.99905	1.5e-14	3.92e-14	--
Unigene0027063	8.6054	0.001	-13.071	7.2e-41	3.18e-40	centrin [Trypanosoma brucei brucei TREU927]
Unigene0027067	4.3928	0.0785	-5.8063	9.47e-13	2.34e-12	Cuticle protein 7 [Lepeophtheirus salmonis]
Unigene0027069	3.5703	0.1654	-4.43201	8.1e-09	1.68e-08	--
Unigene0027072	1.7465	0.2184	-2.99942	0.0034275	0.00495159	--
Unigene0027073	3.5883	0.001	-11.8091	6.05e-08	1.2e-07	elongation factor 2, partial [Ceratomyxa sp. 2 IF-2014]
Unigene0027080	6.2697	0.2119	-4.88694	1.56e-26	5.45e-26	--
Unigene0027084	3.2029	0.0801	-5.32143	3.8e-09	8.05e-09	--
Unigene0027098	5.7124	0.001	-12.4799	2.5e-28	9.08e-28	--
Unigene0027140	9.4619	0.001	-13.2079	1.29e-31	4.97e-31	Cytochrome P450 likeTBP [Echinococcus multilocularis]
Unigene0027172	2.7426	0.2144	-3.67717	4.04e-05	6.76e-05	PREDICTED: LOW QUALITY PROTEIN: multidrug resistance-associated protein 5 [Strongylocentrotus purpuratus]
Unigene0027174	3.1479	0.001	-11.6202	1.21e-07	2.36e-07	PREDICTED: sodium-independent sulfate anion transporter-like [Athalia rosae]
Unigene0027200	5.0993	0.001	-12.3161	2.38e-16	6.57e-16	Alpha (1,3) fucosyltransferase C [Trichuris trichiura]
Unigene0027212	7.3772	0.001	-12.8489	1.08e-36	4.5e-36	small subunit ribosomal protein 14, partial [Micoletzkya japonica]
Unigene0027229	4.93	0.001	-12.2674	3e-17	8.48e-17	--
Unigene0027248	3.3659	0.1913	-4.13708	4.24e-07	8.05e-07	--
Unigene0027250	9.1221	0.001	-13.1552	1.53e-23	5.05e-23	--
Unigene0027251	7.941	0.001	-12.9551	9.9e-28	3.55e-27	--
Unigene0027257	3.6198	0.001	-11.8217	1.89e-12	4.61e-12	S-adenosylmethionine decarboxylase proenzyme, partial [Zootermopsis nevadensis]
Unigene0027259	2.4905	0.001	-11.2822	7.69e-06	1.35e-05	--
Unigene0027278	2.0958	0.1092	-4.26246	0.000122627	0.000197706	--
Unigene0027283	3.8974	0.2812	-3.79284	1.57e-08	3.21e-08	--
Unigene0027286	6.4488	0.2781	-4.53536	2.65e-19	7.93e-19	--
Unigene0027306	11.7315	0.001	-13.5181	1.3e-48	6.32e-48	Protein Bm31 [Brugia malayi]
Unigene0027312	5.1226	0.2027	-4.65946	1.18e-26	4.15e-26	--
Unigene0027325	5.449	0.001	-12.4118	5.97e-14	1.53e-13	--
Unigene0027333	4.104	0.2789	-3.87921	4.74e-14	1.22e-13	--
Unigene0027347	9.4789	0.001	-13.2105	2.72e-51	1.37e-50	large subunit ribosomal protein L9e [Strigomonas culicis]
Unigene0027352	6.7792	0.001	-12.7269	2.56e-31	9.83e-31	glucose-regulated protein 78 [Trypanosoma cruzi]
Unigene0027353	4.6624	0.0857	-5.76563	1.89e-12	4.61e-12	nicotinic acetylcholine receptor alpha subunit [Myzus persicae]
Unigene0027370	2.1331	0.1905	-3.48509	0.000145836	0.000233094	--
Unigene0027388	2.5712	0.2144	-3.58407	7.68e-05	0.000125849	PREDICTED: homeobox protein Nkx-6.1 [Acyrthosiphon pisum]
Unigene0027391	4.5011	0.2724	-4.04648	5.7e-10	1.25e-09	--
Unigene0027395	4.7774	0.001	-12.222	4.77e-10	1.05e-09	--
Unigene0027397	7.2127	0.001	-12.8163	7.59e-21	2.36e-20	--
Unigene0027406	4.9782	0.001	-12.2814	3e-11	6.96e-11	--
Unigene0027408	5.5336	0.001	-12.434	4.77e-19	1.42e-18	--
Unigene0027409	7.2028	0.001	-12.8143	6.01e-20	1.83e-19	--
Unigene0027411	2.696	0.2248	-3.58411	7.68e-05	0.000125849	--
Unigene0027415	4.698	0.1399	-5.06958	3.77e-15	1e-14	--
Unigene0027432	4.0269	0.1399	-4.8472	4.75e-13	1.18e-12	--
Unigene0027434	4.9668	0.001	-12.2781	1.89e-15	5.09e-15	--
Unigene0027439	3.5883	0.102	-5.13666	3.03e-08	6.12e-08	--
Unigene0027443	7.3317	0.1719	-5.41451	1.26e-28	4.59e-28	--
Unigene0027448	3.9734	0.001	-11.9562	6.05e-08	1.2e-07	--
Unigene0027449	4.8061	0.1113	-5.43234	4.77e-10	1.05e-09	PREDICTED: acetylcholine receptor subunit beta-like 1 [Diaphorina citri]
Unigene0027459	2.6748	0.001	-11.3852	9.64e-07	1.79e-06	--
Unigene0027463	4.2905	0.001	-12.0669	9.53e-10	2.07e-09	--
Unigene0027471	4.0273	0.001	-11.9756	6e-11	1.37e-10	apocytochrome b [Diplonema papillatum]
Unigene0027487	3.0743	0.0836	-5.20061	1.52e-08	3.1e-08	PREDICTED: potassium voltage-gated channel protein Shal isoform X1 [Ceratitis capitata]
Unigene0027492	2.1057	0.2194	-3.26266	0.000980413	0.00147255	--
Unigene0027500	3.1976	0.2105	-3.9251	5.78e-06	1.02e-05	--
Unigene0027504	2.8741	0.2114	-3.76506	2.12e-05	3.61e-05	--
Unigene0027519	4.4685	0.0998	-5.48461	2.39e-10	5.34e-10	--
Unigene0027530	2.7426	0.2144	-3.67717	4.04e-05	6.76e-05	--
Unigene0027573	2.4905	0.001	-11.2822	7.69e-06	1.35e-05	--
Unigene0027579	4.8683	0.1602	-4.92547	5.97e-14	1.53e-13	--
Unigene0027581	3.1943	0.0908	-5.13666	3.03e-08	6.12e-08	--
Unigene0027587	4.6749	0.2728	-4.09902	1.21e-22	3.92e-22	--
Unigene0027604	3.7711	0.001	-11.8808	6.05e-08	1.2e-07	--
Unigene0027609	4.5421	0.1721	-4.72204	3.78e-12	9.09e-12	--
Unigene0027631	4.4369	0.001	-12.1153	2.39e-10	5.34e-10	calmodulin, partial [Trypanosoma cruzi]
Unigene0027645	14.0618	0.1613	-6.44589	6.91e-38	2.94e-37	--
Unigene0027655	5.114	0.2558	-4.32136	1.15e-16	3.2e-16	--
Unigene0027658	4.2488	0.0949	-5.4845	2.39e-10	5.34e-10	--
Unigene0027665	1.0784	0.001	-10.0747	0.00097925	0.00147092	GA27615 [Drosophila pseudoobscura pseudoobscura]
Unigene0027666	2.1429	0.001	-11.0653	1.93e-06	3.51e-06	GA27615 [Drosophila pseudoobscura pseudoobscura]
Unigene0027671	6.6793	0.0516	-7.01618	2.5e-28	9.08e-28	--
Unigene0027673	10.2238	0.1806	-5.82299	1.09e-61	6.14e-61	PREDICTED: U8-agatoxin-Ao1a-like isoform X1 [Bombus terrestris]
Unigene0027674	2.4683	0.1102	-4.48532	3.07e-05	5.2e-05	--
Unigene0027695	3.9726	0.0994	-5.32069	3.8e-09	8.05e-09	--
Unigene0027697	3.511	0.0998	-5.1367	3.03e-08	6.12e-08	--
Unigene0027699	2.6033	0.0904	-4.84787	9.64e-07	1.79e-06	--
Unigene0027728	4.8354	0.001	-12.2394	1.89e-12	4.61e-12	--
Unigene0027734	4.4478	0.001	-12.1189	4.75e-13	1.18e-12	--
Unigene0027743	6.2106	0.001	-12.6005	3.78e-18	1.1e-17	--
Unigene0027750	2.8049	0.1403	-4.32136	5.88e-08	1.17e-07	--
Unigene0027753	2.2537	0.2013	-3.48488	0.000145836	0.000233094	--
Unigene0027757	3.1377	0.1962	-3.99931	1.57e-06	2.88e-06	--
Unigene0027770	3.0854	0.1929	-3.99953	1.57e-06	2.88e-06	Protein shisa-9, partial [Stegodyphus mimosarum]
Unigene0027775	3.6392	0.001	-11.8294	3.03e-08	6.12e-08	MULTISPECIES: glyceraldehyde-3-phosphate dehydrogenase [Rhodococcus]
Unigene0027786	2.7426	0.1072	-4.67717	3.85e-06	6.89e-06	--
Unigene0027797	3.9203	0.001	-11.9367	9.53e-10	2.07e-09	GJ17388 [Drosophila virilis]
Unigene0027815	0.3986	0.1246	-1.67764	0.000393673	0.000610673	PREDICTED: protein Wnt-4 [Saccoglossus kowalevskii]
Unigene0027820	3.8776	0.0782	-5.63185	3e-11	6.96e-11	--
Unigene0027822	3.4515	0.001	-11.753	6.05e-08	1.2e-07	--
Unigene0027830	5.0281	0.0953	-5.72139	3.78e-12	9.09e-12	PREDICTED: agrin-like [Tribolium castaneum]
Unigene0027832	8.5636	0.1575	-5.76479	8.48e-36	3.5e-35	hypothetical protein Y032_0031g2417 [Ancylostoma ceylanicum]
Unigene0027848	27.2945	0.0133	-11.003	0	0	GF13205 [Drosophila ananassae]
Unigene0027854	4.1381	0.001	-12.0148	2.38e-13	5.99e-13	PREDICTED: microtubule-associated protein futsch [Bombus impatiens]
Unigene0027857	4.4158	0.001	-12.1085	3.8e-09	8.05e-09	--
Unigene0027858	4.246	0.001	-12.0519	7.59e-09	1.58e-08	--
Unigene0027881	123.073	0.129	-9.89793	0	0	--
Unigene0027896	7.5834	0.001	-12.8886	7.92e-47	3.77e-46	sex peptide receptor [Bemisia tabaci]
Unigene0027901	40.617	0.001	-15.3098	0	0	Deoxynucleoside kinase [Thelohanellus kitauei]
Unigene0027903	2.4605	0.1465	-4.06998	8.16e-07	1.52e-06	--
Unigene0027909	4.8036	0.0924	-5.70008	6.08e-23	1.98e-22	ionotropic receptor 25a, partial [Schistocerca gregaria]
Unigene0027920	6.0291	0.0967	-5.96228	1.97e-27	7.02e-27	--
Unigene0027926	3.0719	0.001	-11.5849	9.64e-07	1.79e-06	--
Unigene0027962	0.464	0.001	-8.85798	0.0312734	0.0412699	--
Unigene0027963	1.0964	0.001	-10.0986	6.14e-05	0.000101469	--
Unigene0027975	10.0511	0.001	-13.2951	5.05e-67	2.98e-66	PREDICTED: 60S ribosomal protein L10 [Strongylocentrotus purpuratus]
Unigene0027978	3.1572	0.2692	-3.5519	4.24e-07	8.05e-07	--
Unigene0027982	4.8849	0.1041	-5.55229	5.1e-31	1.95e-30	--
Unigene0027984	2.8352	0.1043	-4.76464	1.93e-06	3.51e-06	PREDICTED: uncharacterized protein LOC105326375 [Crassostrea gigas]
Unigene0027985	6.0917	0.1484	-5.35928	1.97e-27	7.02e-27	--
Unigene0027995	5.8461	0.058	-6.65528	2.41e-22	7.74e-22	--
Unigene0028006	3.0977	0.1845	-4.0695	8.16e-07	1.52e-06	polyprotein [Antheraea mylitta]
Unigene0028011	4.8056	0.001	-12.2305	1.89e-15	5.09e-15	large subunit ribosomal protein L26e [Strigomonas culicis]
Unigene0028012	4.464	0.001	-12.1241	3.78e-12	9.09e-12	--
Unigene0028065	6.6687	0.001	-12.7032	4.13e-33	1.63e-32	--
Unigene0028079	3.416	0.2756	-3.63166	5.55e-09	1.17e-08	--
Unigene0028082	5.3123	0.1007	-5.7212	3.05e-23	1e-22	--
Unigene0028083	4.4145	0.001	-12.108	6e-11	1.37e-10	--
Unigene0028088	2.7885	0.001	-11.4453	1.93e-06	3.51e-06	--
Unigene0028089	2.2284	0.2144	-3.37763	0.000521183	0.000800081	--
Unigene0028103	5.5392	0.001	-12.4355	1.56e-26	5.45e-26	--
Unigene0028106	3.5425	0.2858	-3.63169	5.55e-09	1.17e-08	PREDICTED: dentin sialophosphoprotein-like [Diaphorina citri]
Unigene0028130	5.6208	0.1612	-5.12385	8.8e-39	3.78e-38	--
Unigene0028142	4.6768	0.2437	-4.26234	1.04e-11	2.46e-11	PREDICTED: gastrin/cholecystokinin type B receptor-like isoform X1 [Monomorium pharaonis]
Unigene0028147	4.4077	0.001	-12.1058	7.59e-09	1.58e-08	PREDICTED: DNA-directed RNA polymerases I, II, and III subunit RPABC4 [Cerapachys biroi]
Unigene0028148	11.7621	0.001	-13.5219	1.12e-39	4.88e-39	--
Unigene0028166	5.7178	0.001	-12.4812	3.81e-21	1.19e-20	--
Unigene0028178	177.212	0.2117	-9.70924	0	0	--
Unigene0028181	6.3797	0.001	-12.6393	2.39e-19	7.16e-19	--
Unigene0028183	2.5163	0.1124	-4.48459	3.07e-05	5.2e-05	--
Unigene0028192	7.9506	0.001	-12.9568	3.35e-35	1.37e-34	--
Unigene0028194	2.292	0.2205	-3.37776	0.000521183	0.000800081	GL17301 [Drosophila persimilis]
Unigene0028198	4.5221	0.001	-12.1428	3e-11	6.96e-11	--
Unigene0028221	4.2944	0.001	-12.0682	4.75e-13	1.18e-12	--
Unigene0028222	3.9319	0.1024	-5.26294	7.59e-09	1.58e-08	--
Unigene0028226	3.9513	0.001	-11.9481	9.53e-10	2.07e-09	--
Unigene0028232	7.8999	0.001	-12.9476	1.26e-28	4.59e-28	--
Unigene0028238	5.7507	0.2956	-4.28202	3.01e-23	9.88e-23	--
Unigene0028251	3.5044	0.1905	-4.2013	2.2e-07	4.23e-07	--
Unigene0028278	2.536	0.001	-11.3083	7.69e-06	1.35e-05	voltage dependent Ca2+ channel Cav2, partial [Apis mellifera]
Unigene0028283	3.5831	0.1723	-4.37821	7.17e-13	1.78e-12	--
Unigene0028294	14.5793	0.001	-13.8316	1.01e-47	4.88e-47	--
Unigene0028310	3.8132	0.001	-11.8968	6e-11	1.37e-10	--
Unigene0028318	4.8806	0.001	-12.2528	2.39e-10	5.34e-10	--
Unigene0028338	4.6635	0.1767	-4.72204	3.78e-12	9.09e-12	--
Unigene0028343	3.0704	0.001	-11.5842	3.85e-06	6.89e-06	ABC transporter family protein [Tetrahymena thermophila SB210]
Unigene0028355	4.2975	0.1654	-4.69947	1.19e-21	3.75e-21	PREDICTED: serine--glyoxylate aminotransferase-like [Amphimedon queenslandica]
Unigene0028361	5.619	0.0627	-6.4857	1.2e-19	3.62e-19	--
Unigene0028363	7.4275	0.1407	-5.72218	3.05e-23	1e-22	--
Unigene0028366	3.5666	0.001	-11.8003	1.21e-07	2.36e-07	--
Unigene0028368	3.3821	0.001	-11.7237	9.64e-07	1.79e-06	--
Unigene0028371	5.4362	0.0919	-5.88639	2.38e-13	5.99e-13	--
Unigene0028372	3.8635	0.1342	-4.84745	4.75e-13	1.18e-12	--
Unigene0028386	4.5469	0.2031	-4.48462	9.58e-14	2.45e-13	--
Unigene0028393	5.6099	0.001	-12.4538	1.89e-12	4.61e-12	--
Unigene0028400	2.4868	0.001	-11.2801	1.93e-06	3.51e-06	--
Unigene0028410	4.9194	0.001	-12.2643	6.01e-20	1.83e-19	--
Unigene0028413	6.3296	0.1277	-5.63128	8.21e-33	3.23e-32	--
Unigene0028430	4.3642	0.1761	-4.63125	3e-11	6.96e-11	--
Unigene0028432	4.4576	0.2844	-3.97027	3.43e-15	9.17e-15	--
Unigene0028435	3.8332	0.2179	-4.13681	1.28e-14	3.35e-14	PREDICTED: kinesin-like protein KIF19-like [Metaseiulus occidentalis]
Unigene0028452	2.7696	0.0911	-4.92608	4.82e-07	9.11e-07	Gag-Pol polyprotein [Schistosoma japonicum]
Unigene0028454	6.3322	0.001	-12.6285	3.17e-29	1.17e-28	--
Unigene0028463	5.9565	0.0423	-7.13766	1.01e-30	3.85e-30	PREDICTED: oxysterol-binding protein-related protein 2 [Tribolium castaneum]
Unigene0028465	4.9235	0.1231	-5.32178	3.78e-18	1.1e-17	GE19805 [Drosophila yakuba]
Unigene0028479	5.1592	0.2846	-4.18014	3.96e-11	9.13e-11	--
Unigene0028487	3.2478	0.001	-11.6652	4.82e-07	9.11e-07	PREDICTED: A disintegrin and metalloproteinase with thrombospondin motifs 18-like isoform X2 [Acyrthosiphon pisum]
Unigene0028489	4.443	0.1029	-5.43222	4.77e-10	1.05e-09	--
Unigene0028499	2.3791	0.093	-4.67704	3.85e-06	6.89e-06	--
Unigene0028526	3.3659	0.001	-11.7168	1.52e-08	3.1e-08	PREDICTED: transmembrane protein 117-like [Aplysia californica]
Unigene0028535	4.8456	0.2331	-4.37765	7.17e-13	1.78e-12	--
Unigene0028536	5.0313	0.001	-12.2967	5.97e-14	1.53e-13	Organic cation transporter protein [Camponotus floridanus]
Unigene0028541	5.2332	0.001	-12.3535	2.99e-14	7.76e-14	--
Unigene0028542	2.4977	0.001	-11.2864	3.85e-06	6.89e-06	--
Unigene0028551	3.1127	0.001	-11.604	9.64e-07	1.79e-06	cytochrome c [Trypanosoma cruzi strain CL Brener]
Unigene0028559	2.3836	0.2981	-2.99927	0.000404902	0.000627407	PREDICTED: myosin-IIIb-like isoform X5 [Athalia rosae]
Unigene0028562	6.6666	0.1924	-5.11477	3.05e-23	1e-22	--
Unigene0028567	3.5382	0.158	-4.48502	4.18e-09	8.81e-09	zinc-containing alcohol dehydrogenase [Dictyostelium discoideum AX4]
Unigene0028568	4.1297	0.2671	-3.95059	2.15e-09	4.6e-09	Neurogenic locus notch-like protein protein 1 [Harpegnathos saltator]
Unigene0028579	5.0874	0.2356	-4.43252	7.74e-18	2.23e-17	PREDICTED: serine-enriched protein [Plutella xylostella]
Unigene0028597	4.5647	0.2114	-4.43247	8.1e-09	1.68e-08	--
Unigene0028599	3.685	0.2194	-4.07003	8.16e-07	1.52e-06	--
Unigene0028613	6.9422	0.001	-12.7612	9.5e-19	2.8e-18	--
Unigene0028626	4.1534	0.1484	-4.80673	9.47e-13	2.34e-12	--
Unigene0028641	6.6116	0.001	-12.6908	1.21e-22	3.92e-22	--
Unigene0028677	3.0063	0.001	-11.5538	9.64e-07	1.79e-06	--
Unigene0028681	3.0611	0.001	-11.5798	1.21e-07	2.36e-07	--
Unigene0028688	6.0214	0.2403	-4.64719	1.7e-15	4.59e-15	--
Unigene0028690	2.7426	0.1429	-4.26247	1.14e-07	2.23e-07	--
Unigene0028691	3.8974	0.001	-11.9283	1.2e-10	2.7e-10	PREDICTED: 40S ribosomal protein S27 [Amphimedon queenslandica]
Unigene0028702	3.9141	0.001	-11.9345	4.75e-13	1.18e-12	--
Unigene0028708	6.678	0.001	-12.7052	1.97e-27	7.02e-27	--
Unigene0028712	6.3939	0.093	-6.10332	3.77e-15	1e-14	--
Unigene0028726	1.7631	0.2004	-3.13716	0.00183717	0.0027032	GG12009 [Drosophila erecta]
Unigene0028745	2.3887	0.001	-11.222	3.07e-05	5.2e-05	--
Unigene0028762	5.4661	0.0645	-6.40507	9.5e-19	2.8e-18	--
Unigene0028763	5.2672	0.001	-12.3628	3.78e-12	9.09e-12	--
Unigene0028764	2.2576	0.1882	-3.58445	7.68e-05	0.000125849	--
Unigene0028766	2.6321	0.2194	-3.58458	7.68e-05	0.000125849	nucleic acid binding protein [Capsaspora owczarzaki ATCC 30864]
Unigene0028771	1.8943	0.1077	-4.13657	0.000245094	0.000385742	--
Unigene0028772	3.7426	0.2507	-3.90001	4.18e-09	8.81e-09	--
Unigene0028780	3.0116	0.001	-11.5563	3.85e-06	6.89e-06	--
Unigene0028798	3.2974	0.2356	-3.80692	2.23e-10	5e-10	--
Unigene0028803	3.8804	0.2022	-4.26235	1.14e-07	2.23e-07	ATP synthase CF1 beta chain [Bigelowiella natans]
Unigene0028806	4.6698	0.001	-12.1891	4.77e-10	1.05e-09	S60 ribosomal protein L19 [Polysphondylium pallidum PN500]
Unigene0028823	41.3194	0.001	-15.3345	0	0	--
Unigene0028834	0.5049	0.001	-8.97985	0.0156414	0.0212459	PREDICTED: probable G-protein coupled receptor Mth-like 3 [Tribolium castaneum]
Unigene0028838	3.4603	0.1082	-4.99912	2.41e-07	4.64e-07	--
Unigene0028846	3.0983	0.001	-11.5973	4.82e-07	9.11e-07	--
Unigene0028863	6.5264	0.157	-5.37745	9.5e-19	2.8e-18	--
Unigene0028876	3.334	0.1097	-4.92562	4.82e-07	9.11e-07	--
Unigene0028878	6.1915	0.001	-12.5961	1.33e-34	5.36e-34	PREDICTED: cell adhesion molecule 2-like, partial [Musca domestica]
Unigene0028888	36.5759	0.0097	-11.8806	0	0	--
Unigene0028901	4.3017	0.001	-12.0707	4.77e-10	1.05e-09	--
Unigene0028902	4.0408	0.001	-11.9804	3.77e-15	1e-14	--
Unigene0028904	26.3199	0.0231	-10.154	0	0	GF17047 [Drosophila ananassae]
Unigene0028915	6.9709	0.2088	-5.06115	5.13e-59	2.79e-58	--
Unigene0028921	7.3262	0.001	-12.8388	3.25e-32	1.27e-31	adenine nucleotide translocase [Theileria parva strain Muguga]
Unigene0028930	5.8138	0.2551	-4.51035	3.29e-37	1.38e-36	GM14873p [Drosophila melanogaster]
Unigene0028932	9.4227	0.2882	-5.031	7.13e-126	6.51e-125	AAEL014888-PA [Aedes aegypti]
Unigene0028933	3.8368	0.1799	-4.41464	3.67e-13	9.17e-13	--
Unigene0028936	3.8506	0.001	-11.9109	3.8e-09	8.05e-09	--
Unigene0028948	81.9767	0.0635	-10.3342	0	0	hypothetical protein KGM_03933 [Danaus plexippus]
Unigene0028954	3.4668	0.0867	-5.32143	3.8e-09	8.05e-09	--
Unigene0028957	4.187	0.2992	-3.80673	6.69e-20	2.03e-19	FMRFamide receptor [Zootermopsis nevadensis]
Unigene0028958	3.2713	0.001	-11.6756	6.05e-08	1.2e-07	--
Unigene0028961	2.5952	0.001	-11.3416	7.69e-06	1.35e-05	--
Unigene0028963	6.6788	0.1401	-5.57506	3.49e-52	1.78e-51	GD15747 [Drosophila simulans]
Unigene0028968	4.8557	0.001	-12.2455	3e-11	6.96e-11	--
Unigene0028969	3.3356	0.001	-11.7037	4.82e-07	9.11e-07	--
Unigene0028972	3.5262	0.001	-11.7839	6.05e-08	1.2e-07	--
Unigene0028981	5.3746	0.001	-12.3919	4.81e-22	1.53e-21	ribosomal protein L27 [Trypanosoma rangeli SC58]
Unigene0028982	5.7403	0.2991	-4.26243	1.25e-18	3.66e-18	--
Unigene0028986	3.8635	0.001	-11.9157	9.47e-13	2.34e-12	--
Unigene0028997	3.9435	0.001	-11.9453	9.47e-13	2.34e-12	--
Unigene0029020	4.4312	0.001	-12.1135	4.74e-16	1.3e-15	--
Unigene0029024	5.2339	0.001	-12.3537	9.5e-19	2.8e-18	PREDICTED: phosphoribosylaminoimidazole-succinocarboxamide synthase-like [Monomorium pharaonis]
Unigene0029033	5.0863	0.001	-12.3124	1.53e-23	5.05e-23	--
Unigene0029037	3.578	0.0973	-5.20057	1.52e-08	3.1e-08	ribosomal protein rps19 [Eurythoe complanata]
Unigene0029045	5.2893	0.001	-12.3689	7.53e-18	2.17e-17	--
Unigene0029048	2.4109	0.1077	-4.48448	3.07e-05	5.2e-05	PREDICTED: potassium voltage-gated channel subfamily H member 3, partial [Diaphorina citri]
Unigene0029068	1.8081	0.1028	-4.13656	1.28e-14	3.35e-14	--
Unigene0029078	5.5144	0.1095	-5.6542	2.41e-22	7.74e-22	--
Unigene0029094	5.2008	0.001	-12.3445	7.52e-15	1.99e-14	--
Unigene0029096	3.5831	0.001	-11.807	1.52e-08	3.1e-08	--
Unigene0029125	4.0589	0.001	-11.9869	1.5e-14	3.92e-14	--
Unigene0029130	5.3185	0.001	-12.3768	3.78e-18	1.1e-17	--
Unigene0029136	2.8741	0.1057	-4.76506	1.93e-06	3.51e-06	--
Unigene0029142	2.8822	0.2773	-3.37765	1.34e-07	2.61e-07	--
Unigene0029143	4.2278	0.001	-12.0457	7.54e-12	1.79e-11	--
Unigene0029171	4.6658	0.0471	-6.63025	9.59e-22	3.04e-21	crustin Pm5 [Penaeus monodon]
Unigene0029198	8.6654	0.0758	-6.83692	1.66e-49	8.18e-49	ubiquitin-conjugating enzyme E2-17 kDa [Dictyostelium purpureum]
Unigene0029210	5.1693	0.1616	-4.99947	1.26e-28	4.59e-28	PREDICTED: oxysterol-binding protein-related protein 2 [Tribolium castaneum]
Unigene0029211	3.481	0.1979	-4.13666	4.24e-07	8.05e-07	PREDICTED: oxysterol-binding protein-related protein 2 [Megachile rotundata]
Unigene0029222	4.863	0.001	-12.2476	1.89e-15	5.09e-15	--
Unigene0029226	16.9969	0.001	-14.053	1.14e-53	5.89e-53	hypothetical protein, unlikely [Trypanosoma brucei gambiense DAL972]
Unigene0029229	5.6689	0.1385	-5.35511	4.84e-45	2.26e-44	voltage-dependent para-like sodium channel, partial [Aedes aegypti]
Unigene0029235	4.3704	0.001	-12.0935	1.89e-18	5.54e-18	crt-1, partial [Pristionchus pacificus]
Unigene0029248	3.6871	0.0961	-5.26181	7.59e-09	1.58e-08	--
Unigene0029251	2.1019	0.2022	-3.37784	0.000521183	0.000800081	--
Unigene0029257	4.322	0.001	-12.0775	1.2e-10	2.7e-10	--
Unigene0029272	6.0969	0.001	-12.5739	4.77e-19	1.42e-18	--
Unigene0029285	4.7877	0.001	-12.2251	4.74e-16	1.3e-15	--
Unigene0029295	3.9786	0.1015	-5.29271	1.5e-17	4.29e-17	--
Unigene0029299	3.2824	0.001	-11.6805	7.59e-09	1.58e-08	--
Unigene0029306	5.1629	0.001	-12.334	1.89e-12	4.61e-12	--
Unigene0029324	2.7248	0.001	-11.4119	3.85e-06	6.89e-06	--
Unigene0029340	3.2669	0.001	-11.6737	1.21e-07	2.36e-07	vacuolar h+-translocating inorganic pyrophosphatase [Stylonychia lemnae]
Unigene0029369	3.596	0.001	-11.8122	9.53e-10	2.07e-09	heat shock protein 90, partial [Rhynchopus sp. ATCC 50230]
Unigene0029385	3.3659	0.2177	-3.95058	2.15e-09	4.6e-09	SCY1-like protein 2, partial [Zootermopsis nevadensis]
Unigene0029390	7.9858	0.001	-12.9632	4.77e-19	1.42e-18	--
Unigene0029398	6.0778	0.001	-12.5693	1.04e-33	4.17e-33	sodium channel protein [Drosophila virilis]
Unigene0029426	4.3111	0.1586	-4.76459	1.89e-12	4.61e-12	--
Unigene0029435	3.2196	0.001	-11.6527	4.82e-07	9.11e-07	--
Unigene0029437	6.0766	0.0884	-6.10307	3.77e-15	1e-14	--
Unigene0029439	12.0547	0.1077	-6.80643	1.3e-48	6.32e-48	--
Unigene0029446	5.3223	0.1447	-5.20091	1.19e-16	3.32e-16	--
Unigene0029450	3.2911	0.001	-11.6844	1.52e-08	3.1e-08	--
Unigene0029458	3.0453	0.1002	-4.92563	4.82e-07	9.11e-07	--
Unigene0029459	4.5395	0.001	-12.1483	3e-11	6.96e-11	--
Unigene0029479	4.512	0.083	-5.76451	1.89e-12	4.61e-12	--
Unigene0029481	3.4576	0.0901	-5.2621	7.59e-09	1.58e-08	protocadherin-like wing polarity protein stan protein, partial [Lasius niger]
Unigene0029487	2.9558	0.1945	-3.92571	5.78e-06	1.02e-05	--
Unigene0029494	5.6066	0.001	-12.4529	1.89e-18	5.54e-18	PREDICTED: soluble guanylate cyclase 88E [Microplitis demolitor]
Unigene0029496	2.5425	0.0994	-4.67686	3.85e-06	6.89e-06	--
Unigene0029506	8.0595	0.001	-12.9765	1.23e-45	5.77e-45	hypothetical protein DAPPUDRAFT_68692, partial [Daphnia pulex]
Unigene0029515	6.0721	0.001	-12.568	1.5e-14	3.92e-14	--
Unigene0029520	4.7468	0.001	-12.2127	1.2e-10	2.7e-10	--
Unigene0029528	5.3977	0.0527	-6.6784	1.21e-22	3.92e-22	--
Unigene0029530	4.9541	0.001	-12.2744	2.38e-13	5.99e-13	--
Unigene0029544	5.3092	0.001	-12.3743	2.38e-13	5.99e-13	--
Unigene0029557	3.8449	0.2671	-3.84749	8.1e-09	1.68e-08	--
Unigene0029559	5.3791	0.001	-12.3931	7.82e-27	2.75e-26	--
Unigene0029579	3.099	0.102	-4.92516	4.82e-07	9.11e-07	--
Unigene0029581	7.5034	0.0769	-6.60842	1.17e-42	5.29e-42	--
Unigene0029583	2.6226	0.1929	-3.76507	2.12e-05	3.61e-05	--
Unigene0029589	6.5448	0.001	-12.6761	1.94e-24	6.5e-24	AGAP006766-PA [Anopheles gambiae str. PEST]
Unigene0029593	6.3271	0.001	-12.6273	9.5e-19	2.8e-18	--
Unigene0029603	2.7202	0.001	-11.4095	1.93e-06	3.51e-06	Breast cancer type 1 susceptibility-like protein [Crassostrea gigas]
Unigene0029629	3.5601	0.001	-11.7977	7.59e-09	1.58e-08	S-adenosylhomocysteine hydrolase [Trypanosoma brucei brucei TREU927]
Unigene0029640	4.2964	0.237	-4.18017	3.96e-11	9.13e-11	--
Unigene0029647	2.2855	0.0953	-4.58389	7.69e-06	1.35e-05	--
Unigene0029658	4.7055	0.0774	-5.92587	2.38e-13	5.99e-13	--
Unigene0029672	4.8717	0.001	-12.2502	1.89e-12	4.61e-12	--
Unigene0029679	2.914	0.1072	-4.76462	1.93e-06	3.51e-06	rp1024 protein [Dictyostelium purpureum]
Unigene0029702	4.1139	0.001	-12.0063	3.8e-09	8.05e-09	--
Unigene0029704	7.5068	0.0796	-6.55929	7.59e-21	2.36e-20	--
Unigene0029708	4.6848	0.001	-12.1938	6e-11	1.37e-10	--
Unigene0029720	3.9987	0.001	-11.9653	9.53e-10	2.07e-09	cathepsin L-like protein [Trypanosoma vivax]
Unigene0029723	3.5431	0.1108	-4.99898	2.41e-07	4.64e-07	PREDICTED: nostrin-like, partial [Diaphorina citri]
Unigene0029745	6.3617	0.0398	-7.3205	6.67e-35	2.71e-34	--
Unigene0029751	3.1479	0.001	-11.6202	1.21e-07	2.36e-07	--
Unigene0029757	5.5242	0.2467	-4.48494	1e-26	3.52e-26	--
Unigene0029760	2.8076	0.001	-11.4551	3.85e-06	6.89e-06	--
Unigene0029774	7.9122	0.0634	-6.96345	3.93e-27	1.39e-26	--
Unigene0029784	8.8193	0.149	-5.88728	4.43e-39	1.91e-38	GM18431 [Drosophila sechellia]
Unigene0029792	3.8776	0.001	-11.9209	6e-11	1.37e-10	tryparedoxin peroxidase [Bodo saltans]
Unigene0029817	2.8352	0.2086	-3.76464	2.12e-05	3.61e-05	--
Unigene0029842	3.2383	0.2025	-3.99924	1.11e-09	2.4e-09	resistance to dieldrin [Drosophila simulans]
Unigene0029859	9.2281	0.001	-13.1718	1.26e-28	4.59e-28	60S acidic ribosomal protein P1 [Naegleria gruberi]
Unigene0029864	6.7318	0.2392	-4.8147	1.34e-29	4.99e-29	PREDICTED: protein still life, isoform SIF type 1 isoform X5 [Fopius arisanus]
Unigene0029865	3.6164	0.001	-11.8203	1.21e-07	2.36e-07	--
Unigene0029874	4.8793	0.001	-12.2525	7.53e-18	2.17e-17	--
Unigene0029885	11.7081	0.001	-13.5152	7.6e-156	8.2e-155	--
Unigene0029919	4.291	0.001	-12.0671	1.89e-12	4.61e-12	--
Unigene0029922	1.4105	0.001	-10.462	0.00391328	0.00561741	--
Unigene0029932	5.0727	0.001	-12.3085	4.02e-30	1.51e-29	--
Unigene0029944	5.0632	0.1979	-4.67721	7.54e-12	1.79e-11	--
Unigene0029949	3.7543	0.001	-11.8743	2.39e-10	5.34e-10	PREDICTED: bruchpilot isoform X1 [Apis mellifera]
Unigene0029976	5.449	0.1747	-4.96304	2.99e-14	7.76e-14	--
Unigene0029982	5.1337	0.001	-12.3258	7.54e-12	1.79e-11	--
Unigene0029999	4.5367	0.001	-12.1474	6e-11	1.37e-10	PREDICTED: 60S acidic ribosomal protein P1-like [Hydra vulgaris]
Unigene0030008	4.4233	0.001	-12.1109	9.5e-19	2.8e-18	PREDICTED: organic cation transporter 1-like [Metaseiulus occidentalis]
Unigene0030015	2.5757	0.2013	-3.67755	4.04e-05	6.76e-05	--
Unigene0030037	5.2893	0.1575	-5.06965	1.21e-22	3.92e-22	PREDICTED: ATP-binding cassette sub-family F member 2-like isoform X1 [Saccoglossus kowalevskii]
Unigene0030041	1.9675	0.1118	-4.13737	0.000245094	0.000385742	--
Unigene0030045	3.5877	0.001	-11.8088	7.59e-09	1.58e-08	--
Unigene0030049	2.0879	0.001	-11.0278	7.69e-06	1.35e-05	PREDICTED: 60S ribosomal protein L9 [Ciona intestinalis]
Unigene0030069	3.9779	0.001	-11.9578	3.8e-09	8.05e-09	dna-mediated transposase [Lasius niger]
Unigene0030078	7.9664	0.0949	-6.39138	1.08e-36	4.5e-36	water and ammonia transporting aquaporin [Lumbricus rubellus]
Unigene0030084	4.0922	0.1828	-4.48454	9.58e-14	2.45e-13	--
Unigene0030088	5.3549	0.001	-12.3866	1.89e-12	4.61e-12	--
Unigene0030094	3.9987	0.001	-11.9653	9.53e-10	2.07e-09	--
Unigene0030101	3.337	0.001	-11.7043	1.21e-07	2.36e-07	--
Unigene0030102	5.7422	0.2618	-4.45507	4.35e-31	1.66e-30	--
Unigene0030124	2.9985	0.163	-4.2013	2.2e-07	4.23e-07	Transposable element P transposase, partial [Camponotus floridanus]
Unigene0030128	2.923	0.0762	-5.26152	7.59e-09	1.58e-08	PREDICTED: serine/threonine-protein kinase 32B [Tribolium castaneum]
Unigene0030130	3.4442	0.001	-11.75	4.82e-07	9.11e-07	60S ribosomal protein [Phragmatopoma lapidosa]
Unigene0030132	3.3659	0.1108	-4.92496	4.82e-07	9.11e-07	--
Unigene0030139	5.5079	0.001	-12.4273	9.47e-13	2.34e-12	--
Unigene0030142	2.6446	0.2067	-3.67744	4.04e-05	6.76e-05	--
Unigene0030149	6.6404	0.1258	-5.72207	1.57e-57	8.4e-57	PREDICTED: limbic system-associated membrane protein-like [Tribolium castaneum]
Unigene0030153	4.9532	0.001	-12.2741	2.99e-14	7.76e-14	--
Unigene0030179	66.6854	0.1892	-8.46132	0	0	--
Unigene0030182	9.0822	0.001	-13.1488	2.61e-93	1.93e-92	--
Unigene0030187	3.3659	0.1108	-4.92496	4.82e-07	9.11e-07	GF24442 [Drosophila ananassae]
Unigene0030194	3.6122	0.001	-11.8187	4.82e-07	9.11e-07	--
Unigene0030222	3.1113	0.001	-11.6033	4.82e-07	9.11e-07	protein disulfide-isomerase A6 [Angomonas deanei]
Unigene0030223	3.3416	0.0836	-5.32089	3.8e-09	8.05e-09	--
Unigene0030228	4.5011	0.001	-12.1361	6e-11	1.37e-10	--
Unigene0030242	3.4442	0.0897	-5.26292	7.59e-09	1.58e-08	--
Unigene0030246	4.244	0.0915	-5.53551	1.2e-10	2.7e-10	--
Unigene0030249	3.5039	0.2191	-3.9993	1.11e-09	2.4e-09	--
Unigene0030271	6.3065	0.1908	-5.04671	2.41e-22	7.74e-22	--
Unigene0030285	3.6164	0.1077	-5.06946	6.05e-08	1.2e-07	MULTISPECIES: ATP-dependent Clp protease ATP-binding protein [Bacillus]
Unigene0030289	5.9435	0.2437	-4.60813	1.77e-20	5.46e-20	--
Unigene0030299	7.4315	0.2489	-4.90002	3.02e-20	9.23e-20	--
Unigene0030300	4.5784	0.2489	-4.20121	3.33e-15	8.91e-15	--
Unigene0030308	2.6212	0.1024	-4.67794	3.85e-06	6.89e-06	UDP-glucose 4-epimerase, partial [Stegodyphus mimosarum]
Unigene0030333	5.4997	0.1842	-4.90001	3.02e-20	9.23e-20	--
Unigene0030344	4.704	0.2846	-4.04688	5.7e-10	1.25e-09	--
Unigene0030351	5.0169	0.0627	-6.32219	1.5e-17	4.29e-17	PREDICTED: basement membrane-specific heparan sulfate proteoglycan core protein-like isoform X4 [Apis mellifera]
Unigene0030354	3.8485	0.083	-5.53504	1.2e-10	2.7e-10	ribosomal protein L7 [Branchiostoma lanceolatum]
Unigene0030355	7.5207	0.1447	-5.69973	6.08e-23	1.98e-22	--
Unigene0030358	3.2236	0.288	-3.48453	1.68e-09	3.6e-09	PREDICTED: RNA-directed DNA polymerase from mobile element jockey-like [Diaphorina citri]
Unigene0030361	20.0814	0.001	-14.2936	7.38e-55	3.86e-54	--
Unigene0030368	5.7044	0.0673	-6.40532	9.5e-19	2.8e-18	--
Unigene0030370	3.7698	0.2526	-3.89956	4.18e-09	8.81e-09	PREDICTED: zinc finger C2HC domain-containing protein 1C-like [Diaphorina citri]
Unigene0030376	5.4289	0.0679	-6.3211	1.5e-17	4.29e-17	GE14056 [Drosophila yakuba]
Unigene0030394	1.9487	0.1108	-4.13648	0.000245094	0.000385742	--
Unigene0030395	4.9859	0.1155	-5.43189	2.39e-19	7.16e-19	--
Unigene0030397	4.3804	0.1956	-4.48508	9.58e-14	2.45e-13	--
Unigene0030401	4.9367	0.2105	-4.55165	1.28e-14	3.35e-14	malic enzyme, partial [Tigriopus californicus]
Unigene0030408	3.5262	0.001	-11.7839	1.2e-10	2.7e-10	adenosylhomocysteinase [Angomonas deanei]
Unigene0030410	4.0957	0.1024	-5.32182	3.8e-09	8.05e-09	--
Unigene0030423	3.3906	0.0848	-5.32133	3.8e-09	8.05e-09	--
Unigene0030428	6.3752	0.1533	-5.37804	1.08e-36	4.5e-36	--
Unigene0030433	2.5163	0.1124	-4.48459	3.07e-05	5.2e-05	--
Unigene0030436	3.9121	0.1747	-4.48499	4.18e-09	8.81e-09	--
Unigene0030448	4.2353	0.001	-12.0482	6e-11	1.37e-10	--
Unigene0030449	4.0822	0.001	-11.9951	3.77e-15	1e-14	--
Unigene0030475	3.441	0.1721	-4.32151	5.88e-08	1.17e-07	cytosolic glycoprotein FP21 [Dictyostelium purpureum]
Unigene0030482	4.1695	0.1043	-5.32106	3.8e-09	8.05e-09	--
Unigene0030490	4.1139	0.001	-12.0063	3.03e-08	6.12e-08	--
Unigene0030493	3.6094	0.001	-11.8175	6e-11	1.37e-10	--
Unigene0030500	3.6269	0.0945	-5.26228	7.59e-09	1.58e-08	--
Unigene0030525	4.4709	0.1747	-4.67761	7.54e-12	1.79e-11	--
Unigene0030534	4.7733	0.242	-4.30191	5.34e-12	1.28e-11	--
Unigene0030537	3.9828	0.0922	-5.43287	4.77e-10	1.05e-09	--
Unigene0030572	2.9752	0.001	-11.5388	1.93e-06	3.51e-06	GDNF family receptor alpha-3 [Zootermopsis nevadensis]
Unigene0030576	2.713	0.2994	-3.17974	0.000122056	0.000197267	--
Unigene0030577	5.4649	0.0854	-5.99982	2.99e-14	7.76e-14	--
Unigene0030579	5.7852	0.0804	-6.16903	4.74e-16	1.3e-15	--
Unigene0030588	6.6926	0.001	-12.7084	1.91e-21	6.02e-21	--
Unigene0030591	4.0751	0.2912	-3.80675	2.23e-10	5e-10	PREDICTED: nucleolar RNA helicase 2-like isoform X2 [Saccoglossus kowalevskii]
Unigene0030602	4.4312	0.001	-12.1135	4.74e-16	1.3e-15	--
Unigene0030616	2.7553	0.1077	-4.67712	3.85e-06	6.89e-06	--
Unigene0030622	5.6864	0.237	-4.58456	6.52e-15	1.73e-14	GM13082 [Drosophila sechellia]
Unigene0030626	3.6727	0.1862	-4.30192	5.34e-12	1.28e-11	AGAP001435-PA-like protein [Anopheles sinensis]
Unigene0030630	2.9886	0.001	-11.5453	1.93e-06	3.51e-06	--
Unigene0030631	3.0854	0.1015	-4.92591	4.82e-07	9.11e-07	--
Unigene0030640	3.5482	0.001	-11.7929	3.03e-08	6.12e-08	--
Unigene0030642	2.0958	0.001	-11.0333	0.000122627	0.000197706	nicotinic acetylcholine receptor subunit alpha 4 isoform 2 [Danaus plexippus]
Unigene0030655	3.2765	0.1024	-4.99987	2.41e-07	4.64e-07	--
Unigene0030660	5.1424	0.001	-12.3282	7.59e-21	2.36e-20	vitellogenin [Tigriopus japonicus]
Unigene0030663	4.4592	0.001	-12.1226	7.54e-12	1.79e-11	--
Unigene0030666	2.836	0.0985	-4.84759	9.64e-07	1.79e-06	--
Unigene0030668	2.955	0.2174	-3.76473	2.12e-05	3.61e-05	--
Unigene0030669	3.7282	0.2412	-3.95018	2.15e-09	4.6e-09	Membrane-associated transporter protein [Zootermopsis nevadensis]
Unigene0030673	11.1971	0.1867	-5.90626	1.56e-26	5.45e-26	--
Unigene0030678	4.0339	0.1802	-4.4845	4.18e-09	8.81e-09	--
Unigene0030681	6.4082	0.001	-12.6457	4.74e-16	1.3e-15	--
Unigene0030682	6.8706	0.001	-12.7462	4.88e-25	1.66e-24	--
Unigene0030688	5.353	0.186	-4.84697	4.75e-13	1.18e-12	--
Unigene0030689	6.6548	0.0757	-6.45796	2.39e-19	7.16e-19	--
Unigene0030707	3.6582	0.2079	-4.13717	7.72e-11	1.76e-10	nonfunctional MIPr variant B [Rhodnius prolixus]
Unigene0030708	3.6248	0.001	-11.8237	4.77e-10	1.05e-09	Protein toll, partial [Stegodyphus mimosarum]
Unigene0030709	5.906	0.1728	-5.09501	3.33e-60	1.84e-59	--
Unigene0030712	4.5011	0.0908	-5.63144	3e-11	6.96e-11	--
Unigene0030715	3.2336	0.001	-11.6589	4.82e-07	9.11e-07	--
Unigene0030723	5.5887	0.2621	-4.41432	3.67e-13	9.17e-13	--
Unigene0030724	5.4387	0.001	-12.409	3.93e-27	1.39e-26	lysyl-tRNA synthetase [Salpingoeca rosetta]
Unigene0030733	5.7345	0.1559	-5.20097	1.19e-16	3.32e-16	PREDICTED: 40S ribosomal protein S2 [Tribolium castaneum]
Unigene0030759	40.6816	0.0884	-8.84611	0	0	ferredoxin [Salpingoeca rosetta]
Unigene0030763	70.0709	0.0607	-10.1729	0	0	--
Unigene0030769	10.0977	0.1913	-5.72205	1.53e-91	1.11e-90	PREDICTED: peptidyl-prolyl cis-trans isomerase B-like [Athalia rosae]
Unigene0030771	7.1255	0.001	-12.7988	1.35e-88	9.64e-88	--
Unigene0030783	38.9947	0.0122	-11.6422	0	0	putative 19 kDa protein [Chelonus inanitus]
Unigene0030791	4.5221	0.001	-12.1428	3e-11	6.96e-11	PREDICTED: solute carrier family 35 member F3 [Tribolium castaneum]
Unigene0030793	3.2352	0.001	-11.6596	1.93e-06	3.51e-06	--
Unigene0030805	4.4494	0.001	-12.1194	4.77e-10	1.05e-09	--
Unigene0030807	3.0225	0.001	-11.5615	4.82e-07	9.11e-07	--
Unigene0030829	5.6376	0.2858	-4.302	1.07e-34	4.34e-34	pol-like protein [Biomphalaria glabrata]
Unigene0030835	11.754	0.001	-13.5209	5.1e-48	2.47e-47	--
Unigene0030840	24.1777	0.0774	-8.28713	5.79e-261	9.63e-260	--
Unigene0030841	1.9867	0.2259	-3.13662	0.00183717	0.0027032	GA27615 [Drosophila pseudoobscura pseudoobscura]
Unigene0030842	2.2057	0.2956	-2.89952	0.000732495	0.00111306	--
Unigene0030853	2.3335	0.001	-11.1883	7.69e-06	1.35e-05	--
Unigene0030860	34.8758	0.001	-15.0899	6.8e-121	6.01e-120	--
Unigene0030864	5.7594	0.001	-12.4917	3e-17	8.48e-17	--
Unigene0030871	4.2345	0.1358	-4.96264	2.99e-14	7.76e-14	--
Unigene0030873	4.443	0.2849	-3.96301	8.77e-12	2.08e-11	--
Unigene0030877	4.4282	0.001	-12.1125	9.47e-13	2.34e-12	--
Unigene0030878	6.2305	0.1791	-5.12051	5.1e-31	1.95e-30	ribosomal protein L32 [Lepidochitona cinerea]
Unigene0030879	6.2437	0.001	-12.6082	1.33e-34	5.36e-34	GL13659 [Drosophila persimilis]
Unigene0030881	3.6299	0.1816	-4.32109	5.88e-08	1.17e-07	--
Unigene0030884	32.5966	0.0253	-10.3314	0	0	--
Unigene0030891	4.1446	0.1728	-4.58406	6.52e-15	1.73e-14	--
Unigene0030896	16.7074	0.07	-7.89892	2e-201	2.67e-200	Deoxyuridine 5'-triphosphate nucleotidohydrolase [Spironucleus salmonicida]
Unigene0030902	2.5633	0.2671	-3.26255	6.66e-05	0.000109855	--
Unigene0030914	4.3158	0.071	-5.92567	2.38e-13	5.99e-13	PREDICTED: BTB/POZ domain-containing protein KCTD16 [Camponotus floridanus]
Unigene0030919	4.4879	0.2631	-4.09236	1.5e-10	3.38e-10	60S ribosomal protein L15-1 [Plasmodium cynomolgi strain B]
Unigene0030933	8.3467	0.001	-13.027	3.93e-27	1.39e-26	--
Unigene0030936	3.7025	0.2395	-3.9504	2.15e-09	4.6e-09	PREDICTED: LOW QUALITY PROTEIN: metabotropic glutamate receptor-like, partial [Tribolium castaneum]
Unigene0030938	5.3087	0.2553	-4.37809	7.17e-13	1.78e-12	PREDICTED: F-BAR and double SH3 domains protein 2 isoform X3 [Ceratitis capitata]
Unigene0030963	6.6597	0.0991	-6.07043	1.59e-29	5.92e-29	--
Unigene0030968	3.1775	0.1728	-4.20072	2.2e-07	4.23e-07	--
Unigene0030971	4.8293	0.1118	-5.43282	4.77e-10	1.05e-09	--
Unigene0030977	4.4716	0.001	-12.1266	7.59e-09	1.58e-08	Transposable element Tcb1 transposase, partial [Stegodyphus mimosarum]
Unigene0030983	4.3808	0.001	-12.097	6e-11	1.37e-10	--
Unigene0030994	3.9629	0.1416	-4.80666	9.47e-13	2.34e-12	--
Unigene0030996	5.084	0.001	-12.3117	2.38e-16	6.57e-16	cytochrome c oxidase subunit 1 [Diplonema sp. ATCC 50224]
Unigene0031002	3.3793	0.001	-11.7225	3.03e-08	6.12e-08	AGAP008533-PA [Anopheles gambiae str. PEST]
Unigene0031003	2.9859	0.0934	-4.9986	2.41e-07	4.64e-07	--
Unigene0031004	25.8057	0.0285	-9.82251	0	0	PREDICTED: DNA polymerase alpha catalytic subunit-like [Amphimedon queenslandica]
Unigene0031013	3.9818	0.1858	-4.4216	1.56e-22	5.02e-22	--
Unigene0031016	5.1357	0.1494	-5.10331	1.89e-15	5.09e-15	--
Unigene0031027	16.5532	0.001	-14.0148	1.39e-83	9.57e-83	GK19836 [Drosophila willistoni]
Unigene0031033	5.3589	0.001	-12.3877	1.89e-15	5.09e-15	--
Unigene0031038	5.1391	0.1461	-5.13649	4.74e-16	1.3e-15	--
Unigene0031042	5.0787	0.001	-12.3102	6e-11	1.37e-10	--
Unigene0031047	4.0126	0.114	-5.13743	4.74e-16	1.3e-15	PREDICTED: ATP-dependent RNA helicase dbp2-like isoform X2 [Hydra vulgaris]
Unigene0031139	6.308	0.001	-12.623	3.86e-24	1.29e-23	--
Unigene0031146	5.5639	0.001	-12.4419	4.77e-19	1.42e-18	--
Unigene0031150	3.967	0.001	-11.9538	9.53e-10	2.07e-09	--
Unigene0031153	4.2314	0.2205	-4.26228	1.04e-11	2.46e-11	PREDICTED: mucin-22-like [Saccoglossus kowalevskii]
Unigene0031154	5.4668	0.001	-12.4165	1.89e-15	5.09e-15	Transposon Ty3-I Gag-Pol polyprotein, partial [Stegodyphus mimosarum]
Unigene0031156	8.2909	0.2841	-4.86706	3.1e-26	1.08e-25	--
Unigene0031159	2.5409	0.1135	-4.48458	3.07e-05	5.2e-05	--
Unigene0031176	4.6281	0.1034	-5.48411	2.39e-10	5.34e-10	--
Unigene0031187	3.6691	0.001	-11.8412	6.05e-08	1.2e-07	cytochrome c oxidase subunit 3 [Diplonema papillatum]
Unigene0031200	4.5491	0.001	-12.1514	9.47e-13	2.34e-12	--
Unigene0031216	5.2417	0.1041	-5.65399	2.41e-22	7.74e-22	Excitatory amino acid transporter 2, partial [Stegodyphus mimosarum]
Unigene0031257	4.3738	0.1272	-5.10372	1.89e-15	5.09e-15	--
Unigene0031260	4.5979	0.1513	-4.92549	5.97e-14	1.53e-13	--
Unigene0031275	3.4711	0.0904	-5.26293	7.59e-09	1.58e-08	--
Unigene0031287	4.9954	0.001	-12.2864	3.78e-12	9.09e-12	--
Unigene0031311	7.0677	0.001	-12.787	2.02e-30	7.62e-30	hypothetical protein IscW_ISCW024385 [Ixodes scapularis]
Unigene0031328	3.9292	0.189	-4.37778	1.57e-08	3.21e-08	--
Unigene0031331	5.6446	0.001	-12.4627	1.51e-20	4.67e-20	--
Unigene0031352	2.6927	0.2105	-3.67716	4.04e-05	6.76e-05	MULTISPECIES: 30S ribosomal protein S5 [Bacteria]
Unigene0031353	5.6732	0.001	-12.4699	2.38e-13	5.99e-13	--
Unigene0031360	5.7852	0.001	-12.4982	3e-17	8.48e-17	--
Unigene0031403	6.2943	0.001	-12.6198	7.53e-18	2.17e-17	--
Unigene0031408	5.8929	0.139	-5.40582	4.77e-19	1.42e-18	PREDICTED: uncharacterized protein LOC101235441 [Hydra vulgaris]
Unigene0031410	2.6779	0.1456	-4.20102	2.2e-07	4.23e-07	--
Unigene0031414	4.2222	0.2031	-4.37773	1.57e-08	3.21e-08	--
Unigene0031419	3.7494	0.0733	-5.6767	1.5e-11	3.54e-11	--
Unigene0031436	5.1294	0.1749	-4.87419	1.2e-19	3.62e-19	nicotinic acetylcholine receptor [Ctenocephalides felis]
Unigene0031449	4.8765	0.1694	-4.84734	2.39e-19	7.16e-19	--
Unigene0031450	2.0958	0.2184	-3.26246	0.000980413	0.00147255	--
Unigene0031452	4.042	0.001	-11.9809	7.59e-09	1.58e-08	ribosomal protein S8 [Papilio xuthus]
Unigene0031486	4.1266	0.1434	-4.84684	4.75e-13	1.18e-12	PREDICTED: blastula protease 10 [Strongylocentrotus purpuratus]
Unigene0031487	4.7831	0.001	-12.2237	9.53e-10	2.07e-09	--
Unigene0031488	5.7453	0.1597	-5.16895	2.38e-16	6.57e-16	--
Unigene0031501	5.7745	0.001	-12.4955	7.53e-18	2.17e-17	--
Unigene0031507	6.5106	0.0822	-6.30751	1.33e-34	5.36e-34	chlorophyll a/b-binding protein II 1 [Bigelowiella natans]
Unigene0031509	1.7041	0.2906	-2.5519	0.0074061	0.0104079	PREDICTED: ADP,ATP carrier protein 3, mitochondrial-like [Amphimedon queenslandica]
Unigene0031528	3.9528	0.001	-11.9487	1.2e-10	2.7e-10	PREDICTED: voltage-dependent calcium channel type A subunit alpha-1 isoform X1 [Bombyx mori]
Unigene0031539	8.4443	0.001	-13.0438	1.21e-22	3.92e-22	--
Unigene0031546	3.511	0.001	-11.7777	6.05e-08	1.2e-07	--
Unigene0031547	3.8075	0.001	-11.8946	2.39e-10	5.34e-10	--
Unigene0031549	8.4955	0.001	-13.0525	3.05e-23	1e-22	--
Unigene0031553	3.622	0.001	-11.8226	9.53e-10	2.07e-09	--
Unigene0031565	4.2314	0.001	-12.0469	4.77e-10	1.05e-09	--
Unigene0031574	3.9578	0.1597	-4.63126	3e-11	6.96e-11	--
Unigene0031576	3.3968	0.2832	-3.58428	1.05e-08	2.17e-08	--
Unigene0031607	3.1101	0.001	-11.6027	1.21e-07	2.36e-07	--
Unigene0031614	3.9095	0.001	-11.9328	3.78e-12	9.09e-12	--
Unigene0031619	2.9859	0.001	-11.544	4.82e-07	9.11e-07	--
Unigene0031621	9.5805	0.2354	-5.34691	4.86e-80	3.24e-79	fructose-bisphosphate aldolase [Dictyostelium discoideum AX4]
Unigene0031629	3.6084	0.2943	-3.616	2.2e-07	4.23e-07	PREDICTED: cGMP-inhibited 3',5'-cyclic phosphodiesterase A-like, partial [Aplysia californica]
Unigene0031661	4.8048	0.001	-12.2303	3.78e-12	9.09e-12	--
Unigene0031664	3.998	0.1087	-5.20085	1.52e-08	3.1e-08	--
Unigene0031666	4.2074	0.001	-12.0387	1.89e-12	4.61e-12	--
Unigene0031671	5.1554	0.2931	-4.13662	7.72e-11	1.76e-10	--
Unigene0031681	4.1139	0.1774	-4.53543	1.2e-10	2.7e-10	--
Unigene0031714	4.7555	0.001	-12.2154	4.77e-10	1.05e-09	--
Unigene0031723	4.4077	0.0919	-5.58382	6e-11	1.37e-10	--
Unigene0031724	5.4205	0.001	-12.4042	1.51e-20	4.67e-20	chlorophyll a/b-binding protein II 1 [Bigelowiella natans]
Unigene0031739	7.6883	0.001	-12.9084	1.12e-77	7.32e-77	serine palmitoyltransferase 1-like [Crassostrea gigas]
Unigene0031756	1.0718	0.2132	-2.32976	0.00019426	0.000307701	PREDICTED: zinc finger protein basonuclin-2-like isoform X1 [Acyrthosiphon pisum]
Unigene0031781	3.6202	0.1029	-5.13675	3.03e-08	6.12e-08	GH16138 [Drosophila grimshawi]
Unigene0031791	9.9765	0.2084	-5.58111	8.27e-145	8.38e-144	AAEL002690-PA [Aedes aegypti]
Unigene0031819	6.2466	0.001	-12.6089	4.77e-19	1.42e-18	40S ribosomal protein S10 [Naegleria gruberi]
Unigene0031820	4.0099	0.001	-11.9694	1.2e-10	2.7e-10	--
Unigene0031848	6.7318	0.0366	-7.523	7.39e-79	4.88e-78	AAEL005176-PA [Aedes aegypti]
Unigene0031851	1.4703	0.001	-10.5219	0.000245094	0.000385742	--
Unigene0031864	12.3066	0.001	-13.5871	2.84e-40	1.25e-39	small subunit ribosomal protein S27e [Strigomonas culicis]
Unigene0031867	6.0041	0.1251	-5.58479	3.81e-21	1.19e-20	ribosomal protein S25 [Lepidochitona cinerea]
Unigene0031868	13.1845	0.001	-13.6866	4.22e-50	2.09e-49	--
Unigene0031896	6.739	0.001	-12.7183	3.17e-29	1.17e-28	PREDICTED: sodium channel protein para isoform X19 [Pogonomyrmex barbatus]
Unigene0031930	5.0829	0.001	-12.3114	8.21e-33	3.23e-32	--
Unigene0031934	3.3659	0.001	-11.7168	9.64e-07	1.79e-06	--
Unigene0031935	4.6381	0.1	-5.53546	7.59e-21	2.36e-20	--
Unigene0031938	6.2533	0.1688	-5.21123	3.29e-49	1.62e-48	PREDICTED: homeobox protein onecut-like [Diaphorina citri]
Unigene0031939	4.4608	0.1395	-4.99897	1.5e-14	3.92e-14	--
Unigene0031941	0.8958	0.2134	-2.06962	0.000328077	0.000510976	At-cadherin [Achaearanea tepidariorum]
Unigene0031969	5.938	0.1092	-5.76493	1.89e-12	4.61e-12	--
Unigene0031976	19.9185	0.2931	-6.08657	4.33e-117	3.74e-116	macrophage migration inhibitory protein [Eriocheir sinensis]
Unigene0031980	3.5402	0.001	-11.7896	1.52e-08	3.1e-08	--
Unigene0031982	4.5899	0.001	-12.1642	1.2e-10	2.7e-10	--
Unigene0032030	3.4082	0.0969	-5.13637	3.03e-08	6.12e-08	RNA-directed DNA polymerase from mobile element jockey, partial [Stegodyphus mimosarum]
Unigene0032061	8.8524	0.2828	-4.96821	9.32e-94	6.9e-93	PREDICTED: myosin-IIIb-like isoform X5 [Athalia rosae]
Unigene0032063	7.8222	0.001	-12.9334	2.15e-36	8.92e-36	--
Unigene0032082	2530.63	0.137	-14.173	0	0	--
Unigene0032084	7.1691	0.1135	-5.98103	9.9e-28	3.55e-27	--
Unigene0032091	3.8539	0.001	-11.9121	4.77e-10	1.05e-09	--
Unigene0032092	11.0558	0.001	-13.4325	4.86e-80	3.24e-79	--
Unigene0032093	4.8535	0.001	-12.2448	1.89e-12	4.61e-12	PREDICTED: SCY1-like protein 2 isoform X2 [Athalia rosae]
Unigene0032094	5.2518	0.0821	-5.99929	2.99e-14	7.76e-14	AGAP005207-PA [Anopheles gambiae str. PEST]
Unigene0032102	5.4397	0.2194	-4.63189	3e-11	6.96e-11	PREDICTED: nephrin isoform X1 [Tribolium castaneum]
Unigene0032109	2.629	0.274	-3.26227	8.82e-07	1.64e-06	PREDICTED: uncharacterized protein LOC103505761 [Diaphorina citri]
Unigene0032138	4.3773	0.001	-12.0958	1.52e-08	3.1e-08	--
Unigene0032141	5.7314	0.001	-12.4847	1.33e-34	5.36e-34	Hydroxyacid oxidase 1, partial [Stegodyphus mimosarum]
Unigene0032145	3.5831	0.2987	-3.58444	1.05e-08	2.17e-08	pol-like protein [Ciona intestinalis]
Unigene0032155	3.1166	0.001	-11.6058	7.59e-09	1.58e-08	--
Unigene0032156	2.7631	0.001	-11.4321	7.69e-06	1.35e-05	--
Unigene0032157	6.9212	0.042	-7.36449	1.69e-35	6.93e-35	--
Unigene0032158	1.933	0.001	-10.9166	6.14e-05	0.000101469	--
Unigene0032217	2.9973	0.001	-11.5494	3.85e-06	6.89e-06	Sodium bicarbonate transporter-like protein 11, partial [Stegodyphus mimosarum]
Unigene0032238	3.1818	0.2412	-3.72154	8.11e-10	1.77e-09	--
Unigene0032239	4.246	0.001	-12.0519	7.59e-09	1.58e-08	60S ribosomal protein L26 [Trypanosoma cruzi strain CL Brener]
Unigene0032242	3.3659	0.078	-5.43137	4.77e-10	1.05e-09	--
Unigene0032247	8.5015	0.001	-13.0535	5.43e-37	2.28e-36	GagPol [Mya arenaria]
Unigene0032272	2.7248	0.2004	-3.7652	2.12e-05	3.61e-05	--
Unigene0032296	5.0069	0.1648	-4.92513	5.97e-14	1.53e-13	--
Unigene0032297	3.1888	0.2215	-3.84764	1.11e-05	1.92e-05	--
Unigene0032332	2.9859	0.1867	-3.99937	1.57e-06	2.88e-06	--
Unigene0032366	7.6709	0.001	-12.9052	3.1e-26	1.08e-25	40S ribosomal protein S27a [Acartia pacifica]
Unigene0032372	4.1315	0.001	-12.0124	3.8e-09	8.05e-09	Protein numb [Zootermopsis nevadensis]
Unigene0032398	3.5738	0.0894	-5.32104	3.8e-09	8.05e-09	--
Unigene0032400	2.8603	0.2981	-3.2623	6.66e-05	0.000109855	--
Unigene0032421	4.4049	0.001	-12.1049	4.75e-13	1.18e-12	--
Unigene0032439	4.512	0.001	-12.1396	3.78e-12	9.09e-12	--
Unigene0032441	4.9004	0.1702	-4.8476	4.75e-13	1.18e-12	--
Unigene0032447	4.2198	0.2553	-4.04691	5.7e-10	1.25e-09	--
Unigene0032451	4.4398	0.2479	-4.16266	1.76e-17	5.01e-17	Transposable element P transposase, partial [Stegodyphus mimosarum]
Unigene0032458	3.9711	0.1461	-4.76451	1.89e-12	4.61e-12	60S ribosomal protein L31 [Aplysia californica]
Unigene0032470	2.112	0.001	-11.0444	3e-17	8.48e-17	--
Unigene0032481	8.551	0.001	-13.0619	2.08e-33	8.24e-33	ribosomal protein L24 [Trypanosoma cruzi strain CL Brener]
Unigene0032502	3.1764	0.1862	-4.09247	1.5e-10	3.38e-10	--
Unigene0032506	3.0063	0.0989	-4.92587	4.82e-07	9.11e-07	--
Unigene0032516	15.7553	0.001	-13.9435	3.62e-41	1.61e-40	Ac1147-like protein, partial [Diaphorina citri]
Unigene0032523	2.4921	0.2226	-3.48484	0.000145836	0.000233094	--
Unigene0032526	11.3077	0.0176	-9.32751	9.54e-268	1.63e-266	viral RNA polymerase subunit p47 [Microplitis demolitor]
Unigene0032527	6.4413	0.0615	-6.71062	2.44e-45	1.14e-44	--
Unigene0032534	6.2647	0.088	-6.1536	2.56e-31	9.83e-31	--
Unigene0032546	5.0121	0.2022	-4.63156	3e-11	6.96e-11	--
Unigene0032553	5.7633	0.2184	-4.72185	3.78e-12	9.09e-12	--
Unigene0032557	3.002	0.2682	-3.48454	5.72e-06	1.01e-05	--
Unigene0032567	51.803	0.046	-10.1372	0	0	PmV-like protein [Cotesia congregata]
Unigene0032596	6.0295	0.0589	-6.67763	1.21e-22	3.92e-22	--
Unigene0032597	2.9039	0.2724	-3.41419	1.06e-05	1.85e-05	--
Unigene0032603	3.3805	0.001	-11.723	1.21e-07	2.36e-07	--
Unigene0032615	7.5284	0.001	-12.8781	3.81e-21	1.19e-20	--
Unigene0032624	2.6321	0.1097	-4.58458	7.69e-06	1.35e-05	--
Unigene0032645	3.5044	0.2858	-3.61609	2.2e-07	4.23e-07	--
Unigene0032646	3.6333	0.1082	-5.06951	6.05e-08	1.2e-07	--
Unigene0032662	3.1546	0.1038	-4.92558	4.82e-07	9.11e-07	--
Unigene0032672	3.6437	0.2205	-4.04655	5.7e-10	1.25e-09	--
Unigene0032674	10.2456	0.2034	-5.65454	7.73e-66	4.51e-65	--
Unigene0032704	3.8747	0.1795	-4.43203	8.1e-09	1.68e-08	40S ribosomal protein S2 [Acartia pacifica]
Unigene0032722	5.097	0.0601	-6.40614	9.5e-19	2.8e-18	--
Unigene0032723	4.8485	0.001	-12.2433	7.54e-12	1.79e-11	--
Unigene0032728	9.9773	0.0731	-7.09263	1.03e-87	7.33e-87	--
Unigene0032729	6.3347	0.0527	-6.90933	1.59e-153	1.7e-152	PREDICTED: BTB/POZ domain-containing protein KCTD16 [Monomorium pharaonis]
Unigene0032739	2.513	0.1048	-4.5837	7.69e-06	1.35e-05	RNA-directed DNA polymerase from mobile element jockey, partial [Stegodyphus mimosarum]
Unigene0032743	4.2721	0.001	-12.0607	1.2e-10	2.7e-10	PREDICTED: solute carrier family 12 member 8 [Microplitis demolitor]
Unigene0032747	3.3135	0.0901	-5.20069	1.52e-08	3.1e-08	--
Unigene0032768	14.4432	0.001	-13.8181	1.2e-85	8.36e-85	--
Unigene0032770	5.9288	0.0757	-6.2913	3e-17	8.48e-17	--
Unigene0032818	3.7381	0.001	-11.8681	1.21e-07	2.36e-07	--
Unigene0032828	5.0121	0.001	-12.2912	6e-11	1.37e-10	ubiquitin-conjugating enzyme e2 2 [Ascaris suum]
Unigene0032831	4.4648	0.001	-12.1244	1.5e-14	3.92e-14	--
Unigene0032837	3.1976	0.001	-11.6428	9.64e-07	1.79e-06	PREDICTED: organic cation transporter protein-like [Ciona intestinalis]
Unigene0032846	7.6888	0.0286	-8.0706	7.9e-58	4.25e-57	--
Unigene0032872	6.7769	0.001	-12.7264	1.5e-14	3.92e-14	--
Unigene0032876	2.8132	0.001	-11.458	6e-11	1.37e-10	AGAP003039-PA-like protein [Anopheles sinensis]
Unigene0032899	7.6051	0.0834	-6.51078	1.12e-39	4.88e-39	--
Unigene0032903	7.2666	0.001	-12.8271	2.97e-43	1.35e-42	--
Unigene0032914	4.2572	0.001	-12.0557	7.54e-12	1.79e-11	ribosomal protein L3e [Micromalthus debilis]
Unigene0032917	3.1546	0.001	-11.6232	9.64e-07	1.79e-06	--
Unigene0032925	1.8713	0.1672	-3.48439	3.76e-08	7.54e-08	Kelch-like protein 3, partial [Stegodyphus mimosarum]
Unigene0032927	4.3817	0.274	-3.99924	4.58e-12	1.1e-11	--
Unigene0032935	7.6736	0.08	-6.58376	9.18e-42	4.1e-41	--
Unigene0032938	4.2314	0.189	-4.48468	4.18e-09	8.81e-09	light harvesting complex protein LHCII-2 [Gymnochlora stellata]
Unigene0032939	10.6118	0.001	-13.3734	3.99e-47	1.91e-46	60S ribosomal protein L22 [Trypanosoma cruzi strain CL Brener]
Unigene0032941	3.511	0.2994	-3.55174	4.24e-07	8.05e-07	triosephosphate isomerase [Capsaspora owczarzaki ATCC 30864]
Unigene0032943	32.5677	0.001	-14.9912	0	0	PREDICTED: ATP-dependent DNA helicase PIF1-like [Acyrthosiphon pisum]
Unigene0032957	3.5189	0.0957	-5.20046	1.52e-08	3.1e-08	--
Unigene0032997	6.2531	0.001	-12.6104	2.38e-13	5.99e-13	60S ribosomal protein L29 [Strongyloides ratti]
Unigene0033011	3.4492	0.001	-11.752	2.41e-22	7.74e-22	large subunit ribosomal protein L15e [Angomonas deanei]
Unigene0033018	6.2065	0.0669	-6.53563	1.51e-20	4.67e-20	photosystem II oxygen evolving enhancer protein 1 [Gymnochlora stellata]
Unigene0033019	5.852	0.2111	-4.79293	9.5e-19	2.8e-18	photosystem II oxygen evolving enhancer protein 1 [Gymnochlora stellata]
Unigene0033020	5.3294	0.0585	-6.50939	3.02e-20	9.23e-20	conserved Plasmodium protein [Plasmodium falciparum 3D7]
Unigene0033027	4.7358	0.0897	-5.72236	3.78e-12	9.09e-12	--
Unigene0033053	14.9754	0.001	-13.8703	9.48e-56	5.01e-55	ribosomal protein L23a [Capsaspora owczarzaki ATCC 30864]
Unigene0033070	4.4579	0.001	-12.1221	9.47e-13	2.34e-12	--
Unigene0033076	19.4637	0.001	-14.2485	1.23e-45	5.77e-45	--
Unigene0033087	3.1245	0.0977	-4.99912	2.41e-07	4.64e-07	PREDICTED: clock-controlled protein 8-like [Harpegnathos saltator]
Unigene0033090	3.5053	0.2055	-4.09233	1.5e-10	3.38e-10	--
Unigene0033099	5.6257	0.0818	-6.10379	3.77e-15	1e-14	--
Unigene0033100	11.3923	0.2968	-5.26242	1.23e-25	4.23e-25	MobB domain containing protein [Trichuris trichiura]
Unigene0033146	6.8435	0.1097	-5.9631	1.97e-27	7.02e-27	alpha-tubulin, partial [Brassicogethes aeneus]
Unigene0033161	4.5049	0.001	-12.1373	3e-11	6.96e-11	--
Unigene0033171	5.3956	0.2908	-4.21368	4.69e-18	1.35e-17	Cadherin-related tumor suppressor, partial [Zootermopsis nevadensis]
Unigene0033186	7.4248	0.1238	-5.90627	1.56e-26	5.45e-26	--
Unigene0033195	3.5024	0.1043	-5.06953	6.05e-08	1.2e-07	--
Unigene0033203	4.5761	0.1734	-4.72194	3.78e-12	9.09e-12	--
Unigene0033218	4.291	0.23	-4.22161	2.03e-11	4.75e-11	--
Unigene0033219	4.2198	0.1702	-4.63187	3e-11	6.96e-11	--
Unigene0033220	4.8671	0.001	-12.2488	4.77e-10	1.05e-09	--
Unigene0033222	7.7724	0.1325	-5.8743	8.8e-39	3.78e-38	--
Unigene0033223	4.5872	0.2732	-4.06958	1.24e-12	3.06e-12	--
Unigene0033227	8.0578	0.001	-12.9762	6.32e-81	4.25e-80	elongation factor 2 [Leishmania braziliensis MHOM/BR/75/M2904]
Unigene0033248	9.1328	0.1543	-5.88725	3.1e-26	1.08e-25	--
Unigene0033250	3.6042	0.1024	-5.13739	3.03e-08	6.12e-08	light harvesting complex protein LHCII-1 [Gymnochlora stellata]
Unigene0033251	3.1405	0.1034	-4.92469	4.82e-07	9.11e-07	light harvesting complex protein LHCII-3 [Gymnochlora stellata]
Unigene0033254	4.0855	0.001	-11.9963	3e-11	6.96e-11	--
Unigene0033283	5.2552	0.224	-4.55218	1.28e-14	3.35e-14	PREDICTED: innexin-11-like [Metaseiulus occidentalis]
Unigene0033284	4.2051	0.001	-12.0379	1.5e-14	3.92e-14	--
Unigene0033288	1.1781	0.1579	-2.89938	0.000732495	0.00111306	--
Unigene0033304	6.4247	0.0414	-7.27785	1.04e-33	4.17e-33	--
Unigene0033305	6.261	0.145	-5.43227	1.26e-28	4.59e-28	--
Unigene0033332	4.2975	0.001	-12.0693	5.97e-14	1.53e-13	ferredoxin-NADP oxidoreductase [Bigelowiella natans]
Unigene0033333	3.0555	0.001	-11.5772	3.85e-06	6.89e-06	ferredoxin-NADP oxidoreductase [Bigelowiella natans]
Unigene0033353	2.9973	0.2205	-3.76481	2.12e-05	3.61e-05	PREDICTED: reticulocyte-binding protein PFD0110w-like isoform X3 [Crassostrea gigas]
Unigene0033367	5.5261	0.001	-12.432	2.99e-14	7.76e-14	--
Unigene0033372	4.5776	0.001	-12.1604	3.78e-12	9.09e-12	--
Unigene0033406	5.1479	0.001	-12.3298	3.78e-18	1.1e-17	Protein Bm210 [Brugia malayi]
Unigene0033410	3.8708	0.001	-11.9184	3.03e-08	6.12e-08	--
Unigene0033425	6.4956	0.1625	-5.32095	3.78e-18	1.1e-17	--
Unigene0033439	6.4082	0.0557	-6.8461	4.88e-25	1.66e-24	--
Unigene0033442	22.6837	0.001	-14.4694	1.07e-82	7.3e-82	--
Unigene0033443	13.0677	0.001	-13.6737	2.23e-39	9.65e-39	hypothetical protein OXYTRI_13059 [Oxytricha trifallax]
Unigene0033444	2.2304	0.093	-4.58393	7.69e-06	1.35e-05	--
Unigene0033447	3.0261	0.2226	-3.76493	2.12e-05	3.61e-05	--
Unigene0033451	3.5431	0.001	-11.7908	4.82e-07	9.11e-07	Metabotropic glutamate receptor, partial [Zootermopsis nevadensis]
Unigene0033461	3.2069	0.1823	-4.13679	4.24e-07	8.05e-07	--
Unigene0033462	5.5471	0.001	-12.4375	1.26e-28	4.59e-28	--
Unigene0033465	3.0063	0.1979	-3.92515	5.78e-06	1.02e-05	--
Unigene0033466	2.683	0.1118	-4.58485	7.69e-06	1.35e-05	--
Unigene0033482	0.9795	0.001	-9.9359	0.000489894	0.000754178	Acetylcholine receptor subunit beta-like 1, partial [Stegodyphus mimosarum]
Unigene0033484	8.829	0.001	-13.108	1.91e-21	6.02e-21	--
Unigene0033515	3.8568	0.0965	-5.32073	3.8e-09	8.05e-09	--
Unigene0033534	4.584	0.001	-12.1624	3.8e-09	8.05e-09	--
Unigene0033551	4.8293	0.001	-12.2376	7.52e-15	1.99e-14	--
Unigene0033554	3.2397	0.001	-11.6616	1.21e-07	2.36e-07	--
Unigene0033578	3.5631	0.001	-11.7989	3.03e-08	6.12e-08	--
Unigene0033579	6.0303	0.001	-12.558	3.25e-32	1.27e-31	THAP domain-containing protein 9, partial [Stegodyphus mimosarum]
Unigene0033588	10.7788	0.001	-13.3959	1.67e-68	9.97e-68	PREDICTED: 40S ribosomal protein S2 [Diaphorina citri]
Unigene0033589	4.781	0.2086	-4.5185	4.9e-14	1.26e-13	--
Unigene0033590	4.0481	0.0617	-6.03583	1.5e-14	3.92e-14	--
Unigene0033600	4.8444	0.001	-12.2421	7.52e-15	1.99e-14	excitatory amino acid transporter 1 domain protein [Necator americanus]
Unigene0033601	5.0292	0.1084	-5.53589	7.59e-21	2.36e-20	PREDICTED: excitatory amino acid transporter 2-like [Metaseiulus occidentalis]
Unigene0033614	5.3797	0.001	-12.3933	1.53e-23	5.05e-23	soluble guanylyl cyclase 2 beta, partial [Lehmannia marginata]
Unigene0033647	4.5337	0.001	-12.1465	9.47e-13	2.34e-12	--
Unigene0033650	6.6098	0.1865	-5.14736	3.99e-47	1.91e-46	PREDICTED: hormonally up-regulated neu tumor-associated kinase [Fopius arisanus]
Unigene0033670	5.3568	0.001	-12.3872	3.78e-12	9.09e-12	tyrosine hydroxylase [Bombyx mori]
Unigene0033698	7.9981	0.001	-12.9654	1.01e-30	3.85e-30	heat shock protein 90, partial [Rhynchopus sp. ATCC 50230]
Unigene0033703	5.3223	0.001	-12.3778	2.38e-16	6.57e-16	--
Unigene0033704	5.3825	0.001	-12.3941	7.54e-12	1.79e-11	--
Unigene0033705	6.8829	0.001	-12.7488	5.64e-40	2.47e-39	--
Unigene0033757	0.4333	0.001	-8.75922	0.00097925	0.00147092	--
Unigene0033762	3.4124	0.001	-11.7366	4.82e-07	9.11e-07	Transmembrane protein 117, partial [Stegodyphus mimosarum]
Unigene0033782	6.2924	0.001	-12.6194	3.86e-24	1.29e-23	--
Unigene0033797	1.8239	0.2281	-2.99929	0.0034275	0.00495159	--
Unigene0033821	4.9004	0.001	-12.2587	4.74e-16	1.3e-15	heat shock protein 70-C [Heterodera glycines]
Unigene0033822	7.7796	0.001	-12.9255	2.73e-37	1.15e-36	heat shock protein 70 [Trypanosoma rangeli]
Unigene0033829	12.5155	0.0408	-8.26093	7.73e-66	4.51e-65	--
Unigene0033830	1.3464	0.001	-10.3949	0.00391328	0.00561741	--
Unigene0033852	3.3112	0.001	-11.6931	6.05e-08	1.2e-07	--
Unigene0033859	2.3479	0.2259	-3.37761	0.000521183	0.000800081	ERC protein 2 [Zootermopsis nevadensis]
Unigene0033897	6.5579	0.0854	-6.26285	5.98e-17	1.68e-16	--
Unigene0033898	2.4891	0.1945	-3.67778	4.04e-05	6.76e-05	Otoferlin, partial [Stegodyphus mimosarum]
Unigene0033913	3.4515	0.001	-11.753	6.05e-08	1.2e-07	--
Unigene0033914	4.4186	0.001	-12.1094	2.39e-10	5.34e-10	--
Unigene0033918	7.1661	0.2489	-4.84755	5.27e-24	1.75e-23	--
Unigene0033921	3.7084	0.2208	-4.06998	8.8e-20	2.66e-19	--
Unigene0033927	3.2862	0.137	-4.58417	6e-11	1.37e-10	--
Unigene0033933	3.623	0.1658	-4.44967	1.87e-13	4.74e-13	AGAP000079-PA [Anopheles gambiae str. PEST]
Unigene0033965	6.9859	0.2621	-4.73626	1.15e-16	3.2e-16	RNA recognition motif domain containing protein [Acanthamoeba castellanii str. Neff]
Unigene0033968	2.5285	0.1129	-4.48516	3.07e-05	5.2e-05	--
Unigene0033983	4.247	0.2724	-3.96265	8.77e-12	2.08e-11	PREDICTED: MAP kinase-activating death domain protein-like, partial [Apis mellifera]
Unigene0033989	2.4977	0.001	-11.2864	3.78e-12	9.09e-12	PREDICTED: 40S ribosomal protein S16 [Microplitis demolitor]
Unigene0033990	5.8892	0.2882	-4.35293	3.86e-36	1.6e-35	--
Unigene0034004	5.0985	0.001	-12.3159	7.52e-15	1.99e-14	bruchpilot, isoform J [Drosophila melanogaster]
Unigene0034006	10.6759	0.001	-13.3821	2.35e-64	1.35e-63	GF22379 [Drosophila ananassae]
Unigene0034016	3.5601	0.0636	-5.80675	9.47e-13	2.34e-12	--
Unigene0034023	5.7214	0.2879	-4.31273	6.89e-28	2.48e-27	--
Unigene0034101	4.7123	0.2105	-4.48454	4.18e-09	8.81e-09	PREDICTED: uncharacterized protein LOC106011793 [Aplysia californica]
Unigene0034129	233.459	0.2619	-9.79993	0	0	--
Unigene0034130	4.531	0.001	-12.1456	1.89e-12	4.61e-12	--
Unigene0034131	9.3533	0.001	-13.1913	2.3e-90	1.66e-89	PREDICTED: DNA ligase 3 [Tribolium castaneum]
Unigene0034158	5.5186	0.0837	-6.04293	1.57e-57	8.4e-57	PREDICTED: protein king tubby [Tribolium castaneum]
Unigene0034210	3.9311	0.2287	-4.1034	4.9e-14	1.26e-13	--
Unigene0034279	7.1007	0.001	-12.7937	1.94e-24	6.5e-24	--
Unigene0034301	1.524	0.001	-10.5736	3.85e-06	6.89e-06	60S ribosomal protein L44 [Trypanosoma cruzi strain CL Brener]
Unigene0034302	3.0473	0.001	-11.5733	2.99e-14	7.76e-14	60S ribosomal protein L44 [Trypanosoma cruzi strain CL Brener]
Unigene0034332	1.2694	0.0661	-4.26335	0.000122627	0.000197706	--
Unigene0034339	1.0285	0.001	-10.0063	0.0156414	0.0212459	--
Unigene0034352	6.7318	0.0979	-6.10354	2.02e-30	7.62e-30	heat shock protein 90, partial [Rhynchopus sp. ATCC 50230]
Unigene0034353	4.5872	0.001	-12.1634	7.52e-15	1.99e-14	heat shock protein 90, partial [Rhynchopus sp. ATCC 50230]
Unigene0034375	6.4339	0.2277	-4.82049	4.77e-19	1.42e-18	--
Unigene0034378	4.4685	0.1331	-5.06921	3.77e-15	1e-14	--
Unigene0034379	9.5501	0.001	-13.2213	9.98e-67	5.87e-66	40S ribosomal protein S6 [Aplysia californica]
Unigene0034382	0.9231	0.0641	-3.84809	0.00097925	0.00147092	--
Unigene0034388	1.3777	0.1077	-3.67717	0.00391328	0.00561741	--
Unigene0034404	1.897	0.1636	-3.53548	1.99e-08	4.05e-08	--
Unigene0034407	7.6401	0.2756	-4.79294	9.5e-19	2.8e-18	--
Unigene0034447	19.1637	0.001	-14.2261	1.41e-70	8.6e-70	ribosomal protein S25 [Trypanosoma rangeli SC58]
Unigene0034449	3.8187	0.1038	-5.2012	1.52e-08	3.1e-08	--
Unigene0034460	0.8991	0.1533	-2.55212	0.0074061	0.0104079	--
Unigene0034468	2.5573	0.2781	-3.20095	1.65e-06	3.02e-06	--
Unigene0034487	6.5962	0.1964	-5.06977	2.59e-59	1.41e-58	pol-like protein [Biomphalaria glabrata]
Unigene0034505	5.5968	0.1884	-4.89273	4.73e-44	2.18e-43	--
Unigene0034537	2.3141	0.001	-11.1762	9.64e-07	1.79e-06	--
Unigene0034549	5.349	0.001	-12.3851	2.41e-22	7.74e-22	Voltage-dependent calcium channel type A subunit alpha-1, partial [Stegodyphus mimosarum]
Unigene0034550	4.6281	0.001	-12.1762	2.99e-14	7.76e-14	PREDICTED: voltage-dependent calcium channel type A subunit alpha-1, partial [Microplitis demolitor]
Unigene0034551	3.5335	0.001	-11.7869	3.03e-08	6.12e-08	PREDICTED: voltage-dependent calcium channel type A subunit alpha-1, partial [Microplitis demolitor]
Unigene0034566	10.8739	0.001	-13.4086	1.82e-41	8.11e-41	PREDICTED: 60S ribosomal protein L19 [Tribolium castaneum]
Unigene0034590	1.1867	0.001	-10.2127	0.000489894	0.000754178	--
Unigene0034591	4.7358	0.001	-12.2094	7.54e-12	1.79e-11	--
Unigene0034596	7.8678	0.1447	-5.76482	8.48e-36	3.5e-35	--
Unigene0034608	8.6958	0.001	-13.0861	7.53e-44	3.46e-43	PREDICTED: 40S ribosomal protein S11 isoform X2 [Diaphorina citri]
Unigene0034646	2.3335	0.0973	-4.58391	7.69e-06	1.35e-05	S60 ribosomal protein L10 [Dictyostelium fasciculatum]
Unigene0034647	3.6122	0.001	-11.8187	4.82e-07	9.11e-07	conserved hypothetical protein [Trichinella spiralis]
Unigene0034660	0.3651	0.001	-8.51215	0.0312734	0.0412699	60S ribosomal protein [Phragmatopoma lapidosa]
Unigene0034661	5.5617	0.001	-12.4413	1.89e-12	4.61e-12	40S ribosomal protein L14 [Trypanosoma brucei brucei TREU927]
Unigene0034669	7.0959	0.2636	-4.75056	5.06e-34	2.03e-33	--
Unigene0034682	1.5061	0.001	-10.5566	0.000122627	0.000197706	60S ribosomal protein L39 [Theileria parva strain Muguga]
Unigene0034684	4.2408	0.001	-12.0501	3.8e-09	8.05e-09	--
Unigene0034695	7.8812	0.154	-5.67741	1.04e-33	4.17e-33	--
Unigene0034696	5.3328	0.2858	-4.22182	4.32e-22	1.38e-21	--
Unigene0034734	4.5195	0.001	-12.1419	3.8e-09	8.05e-09	--
Unigene0034735	5.9945	0.2205	-4.76479	1.89e-12	4.61e-12	--
Unigene0034741	1.2936	0.0359	-5.17126	2.38e-16	6.57e-16	--
Unigene0034748	6.909	0.2215	-4.9631	2.99e-14	7.76e-14	follistatin-like, partial [Nematostella vectensis]
Unigene0034763	21.805	0.001	-14.4124	3.87e-119	3.39e-118	hypothetical protein DAPPUDRAFT_72393, partial [Daphnia pulex]
Unigene0034771	2.8873	0.2124	-3.76487	2.12e-05	3.61e-05	--
Unigene0034780	4.0348	0.2968	-3.76493	4.26e-10	9.4e-10	18w protein [Drosophila yakuba]
Unigene0034813	1.1944	0.2489	-2.26265	0.0127622	0.0174982	--
Unigene0034814	6.9201	0.001	-12.7566	3.99e-47	1.91e-46	large subunit ribosomal protein L13e [Strigomonas culicis]
Unigene0034840	3.2431	0.169	-4.26228	1.14e-07	2.23e-07	--
Unigene0034846	1.7785	0.1264	-3.81459	1.75e-13	4.44e-13	PREDICTED: actin-binding Rho-activating protein-like [Crassostrea gigas]
Unigene0034868	3.5773	0.2237	-3.99923	1.57e-06	2.88e-06	--
Unigene0034869	5.9718	0.0747	-6.32091	1.5e-17	4.29e-17	Protein CBG24524 [Caenorhabditis briggsae]
Unigene0034901	1.5868	0.2205	-2.84727	0.00636217	0.00899314	--
Unigene0034942	4.3859	0.001	-12.0987	3.77e-15	1e-14	--
Unigene0034963	13.8942	0.0987	-7.13722	8.5e-61	4.72e-60	--
Unigene0034980	3.7843	0.2558	-3.88694	2.34e-22	7.5e-22	PREDICTED: protein kinase C-binding protein NELL1-like [Harpegnathos saltator]
Unigene0034983	10.8227	0.001	-13.4018	1.12e-77	7.32e-77	PREDICTED: 40S ribosomal protein S3a-like [Aplysia californica]
Unigene0035021	2.9859	0.1867	-3.99937	1.57e-06	2.88e-06	--
Unigene0035025	8.5303	0.001	-13.0584	1.3e-48	6.32e-48	--
Unigene0035027	5.4392	0.001	-12.4092	6.01e-20	1.83e-19	--
Unigene0035030	6.6366	0.001	-12.6962	6.01e-20	1.83e-19	--
Unigene0035045	5.7124	0.0661	-6.4333	4.77e-19	1.42e-18	--
Unigene0035055	3.3805	0.2013	-4.06982	8.16e-07	1.52e-06	stromal ascorbate peroxidase [Salpingoeca rosetta]
Unigene0035066	10.6531	0.001	-13.379	3.29e-49	1.62e-48	60S ribosomal protein L27a [Strongyloides ratti]
Unigene0035098	4.6572	0.2912	-3.99938	1.25e-18	3.66e-18	RNA-directed DNA polymerase from mobile element jockey, partial [Stegodyphus mimosarum]
Unigene0035103	5.0681	0.1761	-4.84698	4.75e-13	1.18e-12	--
Unigene0035117	4.5933	0.001	-12.1653	7.54e-12	1.79e-11	--
Unigene0035126	5.985	0.2935	-4.34992	3.98e-33	1.57e-32	cysteine protease [Naegleria gruberi]
Unigene0035137	3.8698	0.001	-11.918	4.75e-13	1.18e-12	--
Unigene0035138	3.6434	0.001	-11.8311	4.75e-13	1.18e-12	vitellogenin 2 [Tigriopus japonicus]
Unigene0035158	4.8189	0.2511	-4.26237	1.25e-18	3.66e-18	--
Unigene0035173	1.911	0.001	-10.9001	1.52e-08	3.1e-08	PREDICTED: innexin inx3 [Acyrthosiphon pisum]
Unigene0035174	3.7101	0.0947	-5.29195	1.5e-17	4.29e-17	PREDICTED: innexin inx3 [Acyrthosiphon pisum]
Unigene0035194	4.378	0.001	-12.0961	1.89e-12	4.61e-12	--
Unigene0035201	4.4926	0.001	-12.1333	2.39e-10	5.34e-10	--
Unigene0035243	4.8084	0.001	-12.2313	9.9e-28	3.55e-27	centrosomal protein [Lasius niger]
Unigene0035244	4.3559	0.001	-12.0888	2.38e-13	5.99e-13	--
Unigene0035299	3.2412	0.2339	-3.79256	1.57e-08	3.21e-08	hypothetical protein CAPTEDRAFT_148433 [Capitella teleta]
Unigene0035315	3.3793	0.2756	-3.61608	2.2e-07	4.23e-07	AGAP009875-PA-like protein [Anopheles sinensis]
Unigene0035321	10.2239	0.0457	-7.80554	2.57e-48	1.25e-47	--
Unigene0035338	3.3736	0.0527	-6.00034	2.5e-28	9.08e-28	glyceraldehyde-3-phosphate dehydrogenase [[Bacillus] selenitireducens]
Unigene0035339	12.9054	0.1113	-6.85738	4.22e-50	2.09e-49	--
Unigene0035348	12.8229	0.001	-13.6464	1.37e-51	6.95e-51	--
Unigene0035386	15.6776	0.0203	-9.59301	0	0	putative viral RNA polymerase subunit LEF-8 [Cotesia congregata]
Unigene0035387	19.7827	0.0294	-9.39421	0	0	38K protein [Chelonus inanitus]
Unigene0035388	8.9636	0.001	-13.1299	6.71e-99	5.16e-98	PREDICTED: uncharacterized protein LOC103571590 [Microplitis demolitor]
Unigene0035397	4.638	0.1966	-4.56017	1.35e-19	4.06e-19	--
Unigene0035413	2.7426	0.001	-11.4213	3.85e-06	6.89e-06	--
Unigene0035417	0.62	0.001	-9.27612	0.00782344	0.0109487	--
Unigene0035418	2.1552	0.001	-11.0736	5.97e-14	1.53e-13	--
Unigene0035455	11.8712	0.001	-13.5352	3.29e-49	1.62e-48	60S acidic ribosomal protein P2 [Salpingoeca rosetta]
Unigene0035477	10.1123	0.001	-13.3038	2.04e-107	1.66e-106	ribosomal protein L3 [Trypanoplasma borreli]
Unigene0035480	16.4556	0.2393	-6.10361	1.31e-59	7.15e-59	--
Unigene0035492	5.8938	0.001	-12.525	5.97e-14	1.53e-13	--
Unigene0035512	4.8163	0.1882	-4.67759	7.54e-12	1.79e-11	--
Unigene0035518	3.5335	0.2882	-3.61596	2.2e-07	4.23e-07	Protocadherin-like wing polarity protein stan [Acromyrmex echinatior]
Unigene0035532	8.1968	0.2441	-5.06952	6.93e-52	3.51e-51	--
Unigene0035559	8.1864	0.1745	-5.55193	5.1e-31	1.95e-30	AGAP000019-PA-like protein [Anopheles sinensis]
Unigene0035569	3.2621	0.001	-11.6716	4.82e-07	9.11e-07	--
Unigene0035570	5.3496	0.1761	-4.92496	5.97e-14	1.53e-13	--
Unigene0035581	0.8078	0.001	-9.65785	0.0156414	0.0212459	--
Unigene0035606	6.852	0.1503	-5.51061	1.51e-20	4.67e-20	variable lymphocyte receptor [Salpingoeca rosetta]
Unigene0035608	0.7373	0.2305	-1.67749	0.0169593	0.0229433	FGLa/AST receptor [Rhodnius prolixus]
Unigene0035614	1.0172	0.001	-9.99039	0.000489894	0.000754178	ATPase subunit 9 [Trypanosoma cruzi strain CL Brener]
Unigene0035637	3.0473	0.2858	-3.41445	1.06e-05	1.85e-05	--
Unigene0035655	2.8239	0.1962	-3.84729	1.11e-05	1.92e-05	--
Unigene0035664	3.9541	0.1124	-5.13664	3.03e-08	6.12e-08	--
Unigene0035665	5.1663	0.001	-12.3349	1.2e-10	2.7e-10	granulin-like protein [Biomphalaria glabrata]
Unigene0035675	3.1209	0.0887	-5.13688	3.03e-08	6.12e-08	beta-tubulin, partial [Plasmodium cynomolgi]
Unigene0035697	2.9919	0.1559	-4.26237	1.14e-07	2.23e-07	--
Unigene0035700	5.4745	0.001	-12.4185	2.38e-13	5.99e-13	Follistatin-related protein 5 [Zootermopsis nevadensis]
Unigene0035748	3.9723	0.0469	-6.40424	9.5e-19	2.8e-18	--
Unigene0035762	4.9133	0.001	-12.2625	2.39e-19	7.16e-19	RecName: Full=Cytochrome b6-f complex iron-sulfur subunit, chloroplastic; AltName: Full=Plastohydroquinone:plastocyanin oxidoreductase iron-sulfur protein; AltName: Full=Rieske iron-sulfur protein; Short=ISP; Short=RISP; Flags: Precursor [Bigelowiella natans]
Unigene0035772	5.0792	0.0836	-5.92495	2.38e-13	5.99e-13	--
Unigene0035773	1.2296	0.001	-10.264	0.00097925	0.00147092	--
Unigene0035791	3.9793	0.2164	-4.20074	2.2e-07	4.23e-07	--
Unigene0035792	5.396	0.0519	-6.70001	6.08e-23	1.98e-22	--
Unigene0035795	8.2037	0.001	-13.0021	1.19e-64	6.85e-64	PREDICTED: 60S acidic ribosomal protein P0 [Aplysia californica]
Unigene0035828	3.4867	0.001	-11.7676	1.21e-07	2.36e-07	PREDICTED: cathepsin D-like [Amphimedon queenslandica]
Unigene0035829	3.2352	0.001	-11.6596	1.93e-06	3.51e-06	PREDICTED: lysosomal aspartic protease-like [Bactrocera dorsalis]
Unigene0035845	6.5119	0.1163	-5.80716	9.72e-25	3.28e-24	--
Unigene0035852	4.1862	0.0582	-6.16848	4.74e-16	1.3e-15	--
Unigene0035918	4.3471	0.1875	-4.53509	1.2e-10	2.7e-10	--
Unigene0035992	21.812	0.2718	-6.32643	6.44e-188	8.13e-187	--
Unigene0036046	8.1443	0.1806	-5.49492	1.66e-49	8.18e-49	Sodium-dependent neutral amino acid transporter B(0)AT3 [Crassostrea gigas]
Unigene0036085	10.5147	0.001	-13.3601	5.86e-96	4.42e-95	PREDICTED: guanine nucleotide-binding protein subunit beta-2-like 1-like [Saccoglossus kowalevskii]
Unigene0036093	5.4678	0.2931	-4.2215	2.03e-11	4.75e-11	hypothetical protein SINV_05021, partial [Solenopsis invicta]
Unigene0036103	6.315	0.1082	-5.86701	1.23e-25	4.23e-25	PREDICTED: innexin inx3 [Harpegnathos saltator]
Unigene0036123	3.3183	0.001	-11.6962	9.64e-07	1.79e-06	--
Unigene0036134	3.2352	0.2248	-3.84714	1.11e-05	1.92e-05	--
Unigene0036138	10.3166	0.1075	-6.58449	5.53e-62	3.11e-61	hydroxyacid oxidase [Polysphondylium pallidum PN500]
Unigene0036212	3.2807	0.001	-11.6798	1.21e-07	2.36e-07	--
Unigene0036213	3.7457	0.001	-11.871	3.8e-09	8.05e-09	--
Unigene0036264	4.4209	0.2304	-4.26213	8.67e-16	2.36e-15	AAEL003028-PA [Aedes aegypti]
Unigene0036265	3.6706	0.001	-11.8418	3.03e-08	6.12e-08	--
Unigene0036272	0.7858	0.0393	-4.32156	5.88e-08	1.17e-07	PREDICTED: F-box/LRR-repeat protein 16 [Apis florea]
Unigene0036283	8.9388	0.001	-13.1259	1.41e-62	7.99e-62	--
Unigene0036292	1.5078	0.001	-10.5582	1.93e-06	3.51e-06	PREDICTED: 40S ribosomal protein S21-like [Amphimedon queenslandica]
Unigene0036294	5.558	0.1604	-5.11482	3.05e-23	1e-22	--
Unigene0036303	8.3716	0.2698	-4.95554	3.73e-66	2.18e-65	Sodium-dependent neutral amino acid transporter B(0)AT1, partial [Zootermopsis nevadensis]
Unigene0036351	8.2853	0.1619	-5.67738	4.84e-45	2.26e-44	transcription initiation factor TFIID subunit 2-like protein [Heliconius erato]
Unigene0036399	3.3356	0.0569	-5.87337	7.22e-114	6.12e-113	tipE homolog 3 [Drosophila melanogaster]
Unigene0036414	3.4282	0.2144	-3.99907	1.57e-06	2.88e-06	--
Unigene0036432	8.2412	0.0758	-6.76451	3.99e-47	1.91e-46	--
Unigene0036440	4.7774	0.001	-12.222	3e-11	6.96e-11	--
Unigene0036441	8.3889	0.0648	-7.01634	9.48e-56	5.01e-55	AAEL014422-PA [Aedes aegypti]
Unigene0036443	6.8661	0.001	-12.7453	1.97e-27	7.02e-27	PREDICTED: 60S ribosomal protein L35a [Aplysia californica]
Unigene0036447	6.9085	0.135	-5.67734	1.21e-22	3.92e-22	--
Unigene0036458	6.0753	0.1434	-5.40484	4.77e-19	1.42e-18	hypothetical protein L798_15149 [Zootermopsis nevadensis]
Unigene0036459	5.041	0.001	-12.2995	2.39e-10	5.34e-10	--
Unigene0036483	6.8426	0.1758	-5.28254	6.18e-26	2.14e-25	bursicon-beta [Amphibalanus amphitrite]
Unigene0036491	5.4563	0.001	-12.4137	7.52e-15	1.99e-14	--
Unigene0036495	5.0966	0.1875	-4.76457	1.89e-12	4.61e-12	--
Unigene0036514	6.7318	0.1452	-5.53488	7.59e-21	2.36e-20	--
Unigene0036521	3.5831	0.1067	-5.06958	6.05e-08	1.2e-07	--
Unigene0036580	3.9095	0.2157	-4.17989	3.96e-11	9.13e-11	PREDICTED: cuticlin-1-like, partial [Diaphorina citri]
Unigene0036581	6.0845	0.0809	-6.23286	1.19e-16	3.32e-16	GA14328 [Drosophila pseudoobscura pseudoobscura]
Unigene0036600	2.0418	0.1702	-3.58454	8.65e-13	2.14e-12	hypothetical protein LOTGIDRAFT_136924, partial [Lottia gigantea]
Unigene0036605	0.3988	0.001	-8.63952	0.0156414	0.0212459	ribosomal protein L12 [Acyrthosiphon pisum]
Unigene0036606	0.9094	0.001	-9.82877	3.07e-05	5.2e-05	ribosomal protein L12 [Acyrthosiphon pisum]
Unigene0036641	4.2257	0.0629	-6.06999	7.52e-15	1.99e-14	PREDICTED: GTP-binding protein Di-Ras2-like [Crassostrea gigas]
Unigene0036642	10.746	0.001	-13.3915	6.91e-38	2.94e-37	--
Unigene0036646	4.4109	0.001	-12.1069	7.54e-12	1.79e-11	--
Unigene0036647	5.9638	0.001	-12.542	4.88e-25	1.66e-24	--
Unigene0036648	3.9578	0.001	-11.9505	6e-11	1.37e-10	--
Unigene0036684	6.1133	0.0308	-7.63288	5.9e-43	2.67e-42	Dorsal-ventral patterning protein tolloid, partial [Zootermopsis nevadensis]
Unigene0036712	0.8577	0.001	-9.74433	0.0156414	0.0212459	--
Unigene0036722	5.7883	0.1248	-5.53545	7.59e-21	2.36e-20	hydroxymethyltransferase [Naegleria gruberi]
Unigene0036735	3.9726	0.001	-11.9559	7.59e-09	1.58e-08	--
Unigene0036736	3.1046	0.2157	-3.84731	8.1e-09	1.68e-08	--
Unigene0036755	6.0814	0.2237	-4.76477	1.89e-12	4.61e-12	--
Unigene0036760	6.0982	0.001	-12.5742	7.52e-15	1.99e-14	--
Unigene0036763	10.2531	0.089	-6.84804	8.37e-50	4.14e-49	--
Unigene0036869	7.856	0.001	-12.9396	2.73e-37	1.15e-36	ribosomal protein S19 [Capsaspora owczarzaki ATCC 30864]
Unigene0036881	7.625	0.2751	-4.79271	3.35e-35	1.37e-34	chlorophyll a/b binding protein CP29 [Gymnochlora stellata]
Unigene0036882	3.9578	0.1597	-4.63126	3e-11	6.96e-11	chlorophyll a/b-binding protein CP29 [Bigelowiella natans]
Unigene0036891	8.8837	0.001	-13.1169	4.48e-53	2.3e-52	ribosomal protein l18 [Salpingoeca rosetta]
Unigene0036922	5.5875	0.1536	-5.18495	1.63e-32	6.4e-32	--
Unigene0036923	3.0641	0.001	-11.5812	9.47e-13	2.34e-12	--
Unigene0036925	5.2498	0.001	-12.358	2.38e-13	5.99e-13	--
Unigene0036981	3.3979	0.001	-11.7304	2.39e-10	5.34e-10	acidic ribosomal protein [Ceratitis capitata]
Unigene0036997	1.2189	0.001	-10.2514	0.00391328	0.00561741	ribosomal protein rps4 [Lineus viridis]
Unigene0037006	10.0043	0.0838	-6.89945	4.38e-77	2.84e-76	--
Unigene0037011	2.1995	0.001	-11.103	1.2e-10	2.7e-10	PREDICTED: homeobox protein onecut isoform X1 [Plutella xylostella]
Unigene0037012	1.6614	0.1484	-3.48484	0.000145836	0.000233094	PREDICTED: homeobox protein onecut-like isoform X1 [Apis dorsata]
Unigene0037033	4.1915	0.001	-12.0333	6.08e-23	1.98e-22	PREDICTED: monocyte to macrophage differentiation factor 2 [Tribolium castaneum]
Unigene0037041	6.6366	0.0728	-6.51036	3.02e-20	9.23e-20	--
Unigene0037042	3.9853	0.0804	-5.63135	3e-11	6.96e-11	--
Unigene0037045	5.5504	0.001	-12.4384	1.26e-28	4.59e-28	elongation factor 2 [Trypanosoma grayi]
Unigene0037046	4.4532	0.001	-12.1206	1.89e-12	4.61e-12	elongation factor 2 [Leishmania braziliensis MHOM/BR/75/M2904]
Unigene0037047	2.8873	0.001	-11.4955	3.85e-06	6.89e-06	elongation factor 2 [Angomonas deanei]
Unigene0037048	6.5122	0.001	-12.6689	1.17e-42	5.29e-42	elongation factor 2 [Strigomonas culicis]
Unigene0037077	9.8333	0.001	-13.2635	6.05e-73	3.77e-72	large subunit ribosomal protein L7e [Angomonas deanei]
Unigene0037137	3.0188	0.001	-11.5598	3.78e-12	9.09e-12	60S ribosomal protein L35-like protein [Dermacentor variabilis]
Unigene0037138	1.3777	0.001	-10.428	3.85e-06	6.89e-06	60S ribosomal protein [Phragmatopoma lapidosa]
Unigene0037160	4.2424	0.1608	-4.72154	3.78e-12	9.09e-12	--
Unigene0037174	6.7318	0.001	-12.7168	2.99e-14	7.76e-14	--
Unigene0037197	2.1779	0.001	-11.0887	9.53e-10	2.07e-09	--
Unigene0037199	4.0411	0.1366	-4.88672	2.38e-13	5.99e-13	--
Unigene0037200	4.7175	0.0894	-5.7216	3.78e-12	9.09e-12	--
Unigene0037227	2.6671	0.2943	-3.17991	0.000122056	0.000197267	PREDICTED: protocadherin Fat 2-like [Metaseiulus occidentalis]
Unigene0037231	9.2337	0.001	-13.1727	5.51e-70	3.35e-69	AAEL000987-PA [Aedes aegypti]
Unigene0037313	0.712	0.001	-9.47573	0.000489894	0.000754178	ribosomal protein S7 [Capsaspora owczarzaki ATCC 30864]
Unigene0037314	0.8479	0.001	-9.72775	0.000122627	0.000197706	ribosomal protein S7 [Capsaspora owczarzaki ATCC 30864]
Unigene0037327	3.4316	0.2259	-3.92513	5.78e-06	1.02e-05	--
Unigene0037328	5.1726	0.1702	-4.92559	5.97e-14	1.53e-13	photosystem I reaction center subunit IV [Gymnochlora stellata]
Unigene0037338	6.8306	0.001	-12.7378	2.02e-30	7.62e-30	--
Unigene0037348	7.2474	0.001	-12.8232	1.29e-31	4.97e-31	--
Unigene0037349	6.5235	0.1102	-5.88745	2.38e-13	5.99e-13	--
Unigene0037371	1.157	0.001	-10.1762	0.00782344	0.0109487	--
Unigene0037374	1.097	0.001	-10.0993	0.00391328	0.00561741	--
Unigene0037378	3.3659	0.2631	-3.67731	1.14e-07	2.23e-07	--
[truncated: 267 more rows]

## Sheet: Table S3
Table S3. List of DEGs that only expressed at adult stage
GeneID	cyprid_rpkm	adult_rpkm	log2 Ratio(adult/cyprid)	Pvalue	FDR	Description
Unigene0000002	0.001	6.2013	12.5984	4.53e-26	1.57e-25	PREDICTED: probable E3 SUMO-protein ligase RNF212 isoform X2 [Strongylocentrotus purpuratus]
Unigene0000003	0.001	2.9577	11.5303	1.57e-06	2.88e-06	--
Unigene0000019	0.22	3.5759	4.02273	7.56e-13	1.87e-12	--
Unigene0000022	0.001	6.7661	12.7241	2.42e-18	7.05e-18	--
Unigene0000023	0.001	11.4185	13.4791	9.27e-120	8.14e-119	PREDICTED: rhabdoid tumor deletion region protein 1 [Strongylocentrotus purpuratus]
Unigene0000024	0.1822	9.4793	5.70119	1.77e-77	1.15e-76	--
Unigene0000040	0.001	5.0687	12.3074	8.77e-24	2.91e-23	--
Unigene0000051	0.001	0.9194	9.84455	0.00391328	0.00561741	PREDICTED: cell division control protein 6 homolog [Musca domestica]
Unigene0000053	0.1909	6.9216	5.18022	6.91e-22	2.19e-21	PREDICTED: cell division control protein 6 homolog [Saccoglossus kowalevskii]
Unigene0000055	0.001	4.9394	12.2701	3.43e-31	1.31e-30	--
Unigene0000061	0.001	3.7881	11.8873	5.56e-42	2.49e-41	--
Unigene0000062	0.0379	10.959	8.1757	2.08e-93	1.54e-92	--
Unigene0000063	0.2222	131.488	9.20886	0	0	PREDICTED: macrophage mannose receptor 1-like [Hydra vulgaris]
Unigene0000065	0.0953	2.2347	4.55146	1.54e-13	3.9e-13	PREDICTED: macrophage mannose receptor 1 [Strongylocentrotus purpuratus]
Unigene0000085	0.001	13.0687	13.6738	4.29e-63	2.44e-62	--
Unigene0000095	0.001	10.8739	13.4086	2.15e-150	2.25e-149	--
Unigene0000112	0.001	2.781	11.4414	4.18e-09	8.81e-09	--
Unigene0000131	0.083	3.3222	5.32288	8.65e-13	2.14e-12	soluble adenylyl cyclase [Strongylocentrotus purpuratus]
Unigene0000133	0.0475	6.0847	7.00111	2.01e-41	8.92e-41	PREDICTED: carbohydrate sulfotransferase 5-like [Aplysia californica]
Unigene0000158	0.0806	7.4064	6.52185	8.2e-58	4.41e-57	PREDICTED: RNA-directed DNA polymerase from mobile element jockey-like [Strongylocentrotus purpuratus]
Unigene0000165	0.2303	3.7806	4.03703	4.23e-17	1.19e-16	PREDICTED: phosphoinositide 3-kinase adapter protein 1 [Ceratosolen solmsi marchali]
Unigene0000169	0.001	2.6861	11.3913	1.75e-13	4.44e-13	--
Unigene0000172	0.001	7.9614	12.9588	9.61e-51	4.81e-50	--
Unigene0000191	0.001	3.4988	11.7726	7.72e-11	1.76e-10	tetrameric potassium-selective cyclic nucleotide gated channel [Strongylocentrotus purpuratus]
Unigene0000192	0.001	3.057	11.5779	2.46e-16	6.8e-16	--
Unigene0000199	0.001	8.3882	13.0341	3.24e-27	1.15e-26	--
Unigene0000200	0.001	4.5491	12.1514	4.55e-24	1.52e-23	PREDICTED: hydrocephalus-inducing protein-like, partial [Amphimedon queenslandica]
Unigene0000201	0.001	4.9974	12.287	2.03e-11	4.75e-11	PREDICTED: hydrocephalus-inducing protein-like, partial [Amphimedon queenslandica]
Unigene0000206	0.001	13.1819	13.6863	1.85e-50	9.21e-50	--
Unigene0000207	0.001	9.5094	13.2151	8.68e-45	4.04e-44	--
Unigene0000236	0.2641	7.3318	4.79501	1.12e-38	4.8e-38	--
Unigene0000258	0.1232	6.4233	5.70424	9.51e-78	6.21e-77	--
Unigene0000267	0.2932	16.5779	5.82123	2.96e-117	2.56e-116	--
Unigene0000268	0.001	2.3464	11.1962	8.16e-07	1.52e-06	--
Unigene0000271	0.001	2.1646	11.0799	4.04e-05	6.76e-05	--
Unigene0000278	0.0964	9.1641	6.57082	3.6e-30	1.35e-29	--
Unigene0000279	0.001	9.6565	13.2373	9.61e-51	4.81e-50	--
Unigene0000303	0.001	8.7728	13.0988	4.99e-51	2.51e-50	--
Unigene0000315	0.1168	3.5786	4.93728	1.68e-09	3.6e-09	--
Unigene0000325	0.2428	3.5676	3.87711	3.2e-08	6.44e-08	--
Unigene0000334	0.001	4.0129	11.9704	5.34e-12	1.28e-11	--
Unigene0000337	0.001	3.1776	11.6337	1.11e-09	2.4e-09	--
Unigene0000356	0.1238	31.8235	8.00594	7.34e-83	5.01e-82	--
Unigene0000361	0.2784	3.0172	3.43798	5.92e-08	1.18e-07	cytochrome p450 3047B1 [Brachionus sp. 'koreanus']
Unigene0000372	0.001	4.5127	12.1398	4.52e-45	2.11e-44	PREDICTED: hydrocephalus-inducing protein-like [Aplysia californica]
Unigene0000422	0.2938	1.5618	2.4103	0.0127622	0.0174982	--
Unigene0000424	0.214	5.6652	4.72644	1.34e-22	4.34e-22	--
Unigene0000428	0.001	9.0146	13.138	1.42e-162	1.58e-161	--
Unigene0000434	0.001	4.3843	12.0981	4.69e-18	1.35e-17	--
Unigene0000437	0.2834	6.9986	4.62615	1.78e-40	7.84e-40	cytochrome P450 [Bemisia tabaci]
Unigene0000439	0.001	3.0628	11.5806	1.14e-07	2.23e-07	--
Unigene0000446	0.0819	3.1244	5.25357	3.09e-12	7.46e-12	Zinc finger CW-type PWWP domain protein 1 [Zootermopsis nevadensis]
Unigene0000447	0.0723	7.4548	6.68803	6.06e-158	6.58e-157	--
Unigene0000464	0.001	6.0279	12.5574	2.36e-24	7.9e-24	--
Unigene0000466	0.1524	3.5251	4.53173	7.81e-07	1.46e-06	--
Unigene0000486	0.001	23.0049	14.4897	6.42e-66	3.75e-65	--
Unigene0000491	0.001	5.1315	12.3252	4.46e-28	1.61e-27	--
Unigene0000492	0.001	2.5724	11.3289	2.12e-05	3.61e-05	--
Unigene0000507	0.1037	90.0117	9.76155	0	0	--
Unigene0000524	0.001	3.3338	11.703	3.04e-08	6.13e-08	PREDICTED: LOW QUALITY PROTEIN: uncharacterized protein LOC100634668, partial [Amphimedon queenslandica]
Unigene0000525	0.001	2.7693	11.4353	1.11e-05	1.92e-05	--
Unigene0000528	0.001	2.5614	11.3227	5.78e-06	1.02e-05	Retrovirus-related Pol polyprotein from transposon 412, partial [Stegodyphus mimosarum]
Unigene0000540	0.1312	1.5175	3.53186	3.48e-11	8.04e-11	coiled coil domain containing protein 135 [Hymenolepis microstoma]
Unigene0000542	0.001	3.0107	11.5559	2.39e-12	5.79e-12	PREDICTED: coiled-coil domain-containing protein lobo homolog [Ciona intestinalis]
Unigene0000564	0.2439	237.868	9.92965	0	0	--
Unigene0000574	0.2122	8.1428	5.26203	7.36e-88	5.23e-87	AAEL007765-PA [Aedes aegypti]
Unigene0000575	0.001	2.7921	11.4471	3.96e-11	9.13e-11	PREDICTED: antichymotrypsin-2-like isoform X9 [Bactrocera cucurbitae]
Unigene0000592	0.001	8.1142	12.9862	1.69e-23	5.58e-23	--
Unigene0000639	0.001	4.0812	11.9948	7.17e-13	1.78e-12	--
Unigene0000643	0.001	48.873	15.5768	0	0	--
Unigene0000646	0.2816	2.4648	3.12975	0.000313464	0.000489328	PREDICTED: neuroligin 4-like, partial [Musca domestica]
Unigene0000664	0.0343	11.4792	8.3866	4.74e-108	3.86e-107	--
Unigene0000667	0.001	4.3713	12.0938	1.4e-12	3.43e-12	Protein CIP2A [Zootermopsis nevadensis]
Unigene0000677	0.2689	3.3634	3.64478	1.07e-09	2.32e-09	--
Unigene0000678	0.1672	3.9195	4.55102	1.54e-13	3.9e-13	--
Unigene0000705	0.001	4.8456	12.2425	1.75e-13	4.44e-13	--
Unigene0000706	0.001	13.9196	13.7648	2.59e-233	3.9e-232	--
Unigene0000708	0.001	7.6225	12.896	3.4e-78	2.23e-77	PREDICTED: papilin-like, partial [Saccoglossus kowalevskii]
Unigene0000713	0.0705	10.243	7.1828	9.43e-92	6.89e-91	PREDICTED: uncharacterized protein LOC105441691 [Strongylocentrotus purpuratus]
Unigene0000714	0.001	34.5621	15.0769	0	0	Transposon Tf2-6 polyprotein [Thelohanellus kitauei]
Unigene0000716	0.1333	6.5224	5.61265	3.08e-58	1.66e-57	--
Unigene0000721	0.001	5.582	12.4466	3.37e-13	8.45e-13	--
Unigene0000732	0.001	4.9914	12.2852	7.72e-11	1.76e-10	--
Unigene0000733	0.001	1.0883	10.0879	0.00391328	0.00561741	--
Unigene0000735	0.001	4.2094	12.0394	3.96e-11	9.13e-11	PREDICTED: hydrocephalus-inducing protein homolog [Athalia rosae]
Unigene0000737	0.173	2.4882	3.84626	0.000222778	0.000351847	Condensin-2 complex subunit D3 [Harpegnathos saltator]
Unigene0000751	0.001	1.7119	10.7414	1.11e-09	2.4e-09	neuropeptide GPCR B2 [Nilaparvata lugens]
Unigene0000761	0.001	7.4243	12.858	1.89e-35	7.76e-35	--
Unigene0000763	0.1036	13.3728	7.01213	5.74e-81	3.86e-80	--
Unigene0000765	0.001	6.0871	12.5715	1.96e-37	8.28e-37	--
Unigene0000774	0.001	28.1504	14.7809	3.59e-183	4.43e-182	--
Unigene0000783	0.001	29.1822	14.8328	1.53e-177	1.84e-176	AAEL008692-PA [Aedes aegypti]
Unigene0000786	0.001	2.2933	11.1632	0.000145836	0.000233094	--
Unigene0000791	0.001	6.3215	12.6261	1.66e-64	9.56e-64	--
Unigene0000801	0.001	3.0292	11.5647	3.01e-06	5.44e-06	--
Unigene0000802	0.1559	17.4001	6.80233	1.29e-137	1.25e-136	--
Unigene0000817	0.001	5.778	12.4964	6.6e-31	2.51e-30	--
Unigene0000818	0.001	7.5802	12.888	9.33e-36	3.85e-35	PREDICTED: protein SpAN [Strongylocentrotus purpuratus]
Unigene0000837	0.1376	5.5942	5.34538	4.57e-13	1.14e-12	--
Unigene0000846	0.001	3.8753	11.9201	6.59e-17	1.85e-16	--
Unigene0000847	0.001	3.2922	11.6848	4.24e-07	8.05e-07	--
Unigene0000849	0.001	0.6431	9.3289	0.00097925	0.00147092	--
Unigene0000852	0.2673	1.2537	2.22966	0.0352229	0.0462678	Ral GTPase-activating protein subunit alpha-2, partial [Stegodyphus mimosarum]
Unigene0000862	0.2307	3.6494	3.98357	5.14e-40	2.25e-39	PREDICTED: sterile alpha motif domain-containing protein 15-like [Ciona intestinalis]
Unigene0000863	0.001	26.1537	14.6747	0	0	PREDICTED: coiled-coil domain-containing protein 173 [Strongylocentrotus purpuratus]
Unigene0000885	0.1496	12.608	6.39709	0	0	--
Unigene0000895	0.001	2.0103	10.9732	1.75e-13	4.44e-13	--
Unigene0000913	0.001	3.2475	11.6651	4.24e-07	8.05e-07	--
Unigene0000930	0.0931	9.3188	6.64522	3.47e-123	3.11e-122	polyprotein [Mizuhopecten yessoensis]
Unigene0000954	0.001	4.2213	12.0435	9.12e-14	2.33e-13	--
Unigene0000955	0.001	3.9383	11.9434	6.29e-23	2.05e-22	--
Unigene0000960	0.001	5.1493	12.3302	3.24e-27	1.15e-26	--
Unigene0000962	0.001	7.854	12.9392	1.29e-32	5.06e-32	--
Unigene0000963	0.0551	39.373	9.48094	0	0	aspartic protease precursor [Clonorchis sinensis]
Unigene0001016	0.132	6.2315	5.56097	6.46e-29	2.38e-28	--
Unigene0001017	0.1194	5.0037	5.38912	1.27e-13	3.24e-13	--
Unigene0001039	0.0346	7.8182	7.81992	9.1e-143	9.1e-142	PREDICTED: probable serine/threonine-protein kinase yakA [Megachile rotundata]
Unigene0001045	0.001	6.4952	12.6652	3.48e-35	1.42e-34	--
Unigene0001046	0.001	5.5454	12.4371	9.03e-47	4.3e-46	--
Unigene0001052	0.001	7.6923	12.9092	4.5e-22	1.44e-21	--
Unigene0001060	0.2668	8.8017	5.04395	5.6e-38	2.39e-37	Guanine nucleotide-binding protein subunit gamma-1, partial [Stegodyphus mimosarum]
Unigene0001082	0.2536	4.2021	4.05048	1.57e-09	3.39e-09	--
Unigene0001084	0.001	201.563	17.6209	0	0	--
Unigene0001085	0.001	69.2939	16.0804	0	0	--
Unigene0001086	0.1461	3.5161	4.58895	4.49e-14	1.16e-13	PREDICTED: neuroblastoma-amplified sequence-like [Aplysia californica]
Unigene0001101	0.1251	2.6593	4.40989	8.82e-07	1.64e-06	--
Unigene0001105	0.001	2.0777	11.0208	0.000145836	0.000233094	hypothetical protein RFI_22182 [Reticulomyxa filosa]
Unigene0001106	0.001	2.0488	11.0006	0.000145836	0.000233094	--
Unigene0001116	0.001	6.1065	12.5761	1.96e-66	1.15e-65	PREDICTED: formin-like protein 14 [Strongylocentrotus purpuratus]
Unigene0001124	0.2343	2.3444	3.32279	6.02e-05	9.98e-05	--
Unigene0001149	0.001	0.7321	9.5159	0.0156414	0.0212459	--
Unigene0001153	0.1687	10.4419	5.95178	5.25e-38	2.24e-37	--
Unigene0001161	0.2321	5.044	4.44175	1.2e-23	3.96e-23	PREDICTED: LOW QUALITY PROTEIN: solute carrier family 13 member 3-like [Metaseiulus occidentalis]
Unigene0001175	0.1894	4.5	4.57042	8.31e-14	2.13e-13	--
Unigene0001192	0.001	0.9014	9.81602	0.000276113	0.000432611	--
Unigene0001202	0.001	10.1711	13.3122	6.13e-44	2.82e-43	--
Unigene0001214	0.001	1.4763	10.5278	7.68e-05	0.000125849	--
Unigene0001215	0.001	5.7027	12.4774	1.28e-14	3.35e-14	--
Unigene0001216	0.001	8.7524	13.0955	6.26e-27	2.21e-26	--
Unigene0001221	0.001	3.841	11.9073	4.76e-16	1.3e-15	PREDICTED: uncharacterized protein LOC105346226 [Crassostrea gigas]
Unigene0001248	0.2086	2.9999	3.8461	5.81e-08	1.16e-07	PREDICTED: methyltransferase-like protein 24 isoform X2 [Aplysia californica]
Unigene0001249	0.001	39.3307	15.2634	9.53546696473606e-322	1.92240942796829e-320	PREDICTED: estradiol 17-beta-dehydrogenase 8 [Nasonia vitripennis]
Unigene0001252	0.001	3.4697	11.7606	2.39e-12	5.79e-12	--
Unigene0001253	0.001	5.5362	12.4347	8.79e-28	3.15e-27	--
Unigene0001254	0.001	1.0366	10.0176	6.14e-05	0.000101469	--
Unigene0001268	0.001	10.5571	13.3659	9.85e-36	4.06e-35	--
Unigene0001288	0.001	4.8284	12.2373	3.27e-25	1.11e-24	--
Unigene0001293	0.208	7.0885	5.09082	1.59e-20	4.91e-20	--
Unigene0001300	0.001	27.4079	14.7423	1.81e-244	2.84e-243	--
Unigene0001301	0.001	5.8059	12.5033	6.54e-83	4.46e-82	--
Unigene0001329	0.001	4.3735	12.0946	1.69e-23	5.58e-23	--
Unigene0001335	0.001	3.6858	11.8478	2.2e-07	4.23e-07	--
Unigene0001337	0.2536	2.6164	3.36696	3.44e-05	5.81e-05	--
Unigene0001369	0.001	2.5888	11.3381	5.88e-08	1.17e-07	--
Unigene0001370	0.001	3.9338	11.9417	3.37e-13	8.45e-13	--
Unigene0001392	0.001	6.7486	12.7204	1.27e-30	4.81e-30	--
Unigene0001407	0.001	4.3274	12.0793	4.18e-09	8.81e-09	--
Unigene0001408	0.001	7.6279	12.8971	3.81e-59	2.08e-58	chagas antigen, partial [Trypanosoma cruzi]
Unigene0001409	0.001	9.3207	13.1862	2.36e-45	1.1e-44	--
Unigene0001410	0.001	0.6482	9.3403	0.0312734	0.0412699	--
Unigene0001413	0.0499	19.0769	8.57857	7.61e-241	1.18e-239	PREDICTED: EF-hand domain-containing protein D2 homolog [Plutella xylostella]
Unigene0001425	0.001	8.6987	13.0866	8.17e-54	4.23e-53	LEA-1, isoform e [Caenorhabditis elegans]
Unigene0001435	0.001	4.3593	12.0899	2.46e-16	6.8e-16	--
Unigene0001458	0.001	1.4849	10.5362	7.68e-05	0.000125849	--
Unigene0001473	0.2799	7.3497	4.7147	3.89e-71	2.39e-70	PREDICTED: intraflagellar transport protein 88 homolog [Athalia rosae]
Unigene0001485	0.001	5.3469	12.3845	1.19e-20	3.67e-20	--
Unigene0001490	0.0562	19.3573	8.42809	1.63e-110	1.35e-109	GD15899 [Drosophila simulans]
Unigene0001495	0.0501	233.38	12.1856	0	0	Sorbitol dehydrogenase [Zootermopsis nevadensis]
Unigene0001500	0.001	4.8613	12.2471	2.76e-38	1.18e-37	--
Unigene0001517	0.001	7.3043	12.8345	6.05e-130	5.65e-129	cys-loop ligand-gated ion channel subunit 12344 precursor [Nasonia vitripennis]
Unigene0001525	0.001	7.3696	12.8474	1.09e-43	4.97e-43	PREDICTED: serine proteinase stubble-like, partial [Diaphorina citri]
Unigene0001526	0.062	4.5178	6.18721	5.19e-45	2.42e-44	--
Unigene0001527	0.0614	0.7295	3.5706	0.00131833	0.00196391	--
Unigene0001541	0.001	4.2005	12.0363	5.7e-10	1.25e-09	--
Unigene0001570	0.001	5.886	12.5231	2.34e-22	7.5e-22	PREDICTED: succinate-semialdehyde dehydrogenase, mitochondrial-like [Metaseiulus occidentalis]
Unigene0001571	0.0494	5.301	6.74561	4.55e-67	2.69e-66	succinic semialdehyde dehydrogenase [Drosophila buzzatii]
Unigene0001582	0.0658	2.3234	5.14201	2.43e-21	7.63e-21	PREDICTED: macrophage mannose receptor 1 isoform X2 [Strongylocentrotus purpuratus]
Unigene0001641	0.001	2.7042	11.401	4.58e-12	1.1e-11	polyprotein, partial [Bemisia tabaci]
Unigene0001642	0.001	11.9273	13.542	1.32e-265	2.23e-264	unkown protein [Riptortus pedestris]
Unigene0001643	0.001	3.9142	11.9345	4.46e-28	1.61e-27	--
Unigene0001656	0.0572	11.8528	7.695	1.33e-131	1.25e-130	Sialidase [Cerapachys biroi]
Unigene0001658	0.001	4.8266	12.2368	1.69e-25	5.81e-25	--
Unigene0001659	0.001	3.5053	11.7753	1.11e-61	6.2e-61	PREDICTED: sodium-dependent noradrenaline transporter [Bactrocera dorsalis]
Unigene0001677	0.0595	13.2958	7.80387	3.94e-141	3.91e-140	PREDICTED: CD63 antigen-like isoform X2 [Apis florea]
Unigene0001678	0.001	5.0369	12.2983	9.33e-36	3.85e-35	--
Unigene0001684	0.1021	154.29	10.5614	0	0	PREDICTED: phosphoglycerate kinase [Tribolium castaneum]
Unigene0001695	0.001	0.4348	8.76421	0.00195752	0.00287421	--
Unigene0001696	0.2004	1.0338	2.367	0.000327558	0.000510468	--
Unigene0001711	0.001	5.1646	12.3344	2.39e-12	5.79e-12	--
Unigene0001714	0.0403	5.791	7.16689	1.19e-90	8.65e-90	phosphatidylinositol triP phosphatase [Rhipicephalus microplus]
Unigene0001722	0.001	0.5402	9.07735	0.0312734	0.0412699	--
Unigene0001735	0.001	4.3651	12.0918	1.76e-17	5.01e-17	--
Unigene0001743	0.001	3.8586	11.9139	2.15e-09	4.6e-09	--
Unigene0001744	0.001	5.1522	12.331	6.59e-17	1.85e-16	--
Unigene0001745	0.2092	5.6244	4.74874	3.91e-23	1.28e-22	PREDICTED: centrosomal protein of 192 kDa-like [Hydra vulgaris]
Unigene0001761	0.001	5.4556	12.4135	3.4e-17	9.61e-17	--
Unigene0001762	0.001	2.4834	11.2781	4.24e-07	8.05e-07	--
Unigene0001766	0.2893	1.3565	2.22925	0.0352229	0.0462678	PREDICTED: hydrocephalus-inducing protein homolog [Strongylocentrotus purpuratus]
Unigene0001767	0.001	5.8664	12.5183	4.58e-12	1.1e-11	--
Unigene0001823	0.001	16.6025	14.0191	2.07e-97	1.58e-96	--
Unigene0001824	0.001	21.8919	14.4181	3.19e-248	5.09e-247	hypothetical protein NEMVEDRAFT_v1g221795 [Nematostella vectensis]
Unigene0001866	0.2953	7.1079	4.58917	2.26e-64	1.3e-63	PREDICTED: polycystic kidney disease protein 1-like 2 [Aplysia californica]
Unigene0001877	0.001	5.4832	12.4208	6.17e-21	1.92e-20	--
Unigene0001884	0.001	0.7791	9.60566	0.0312734	0.0412699	histone-lysine n-methyltransferase setmar-like protein [Lasius niger]
Unigene0001901	0.1904	3.809	4.32231	3.7e-11	8.55e-11	PREDICTED: LOW QUALITY PROTEIN: ubiquitin carboxyl-terminal hydrolase 24-like [Saccoglossus kowalevskii]
Unigene0001904	0.1797	3.3716	4.22977	2.24e-10	5.02e-10	PREDICTED: fidgetin-like protein 1-like [Saccoglossus kowalevskii]
Unigene0001920	0.001	8.1983	13.0011	4.71e-30	1.77e-29	--
Unigene0001928	0.001	2.8062	11.4544	3.04e-08	6.13e-08	--
Unigene0001935	0.001	4.2404	12.05	3.32e-19	9.9e-19	polyprotein-like protein [Scylla paramamosain]
Unigene0001936	0.1691	2.4314	3.84584	0.000222778	0.000351847	--
Unigene0001944	0.2673	6.8117	4.67148	3.9e-28	1.41e-27	--
Unigene0001956	0.001	7.4682	12.8665	3.33e-46	1.57e-45	AAEL012748-PA [Aedes aegypti]
Unigene0001957	0.001	3.0243	11.5624	1.57e-06	2.88e-06	--
Unigene0001968	0.2063	3.5469	4.10374	4.66e-10	1.03e-09	--
Unigene0001970	0.0626	168.661	11.3957	0	0	--
Unigene0002030	0.001	5.6353	12.4603	9.32e-34	3.73e-33	--
Unigene0002050	0.001	3.0751	11.5864	3.43e-15	9.17e-15	dynein heavy chain axonemal [Clonorchis sinensis]
Unigene0002051	0.001	1.7878	10.804	0.000145836	0.000233094	PREDICTED: dynein heavy chain 1, axonemal-like, partial [Ciona intestinalis]
Unigene0002062	0.2577	6.8756	4.73772	7.25e-23	2.36e-22	serine protease P13 [Tribolium castaneum]
Unigene0002090	0.1266	161.532	10.3173	0	0	pyruvate kinase 2 [Litopenaeus vannamei]
Unigene0002123	0.0746	6.5514	6.45648	4.8e-55	2.52e-54	PREDICTED: histone-lysine N-methyltransferase SETMAR-like [Megachile rotundata]
Unigene0002135	0.0647	7.4878	6.85463	5.95e-37	2.49e-36	--
Unigene0002163	0.001	3.641	11.8301	1.21e-22	3.92e-22	--
Unigene0002164	0.0284	5.0461	7.47313	1.21e-56	6.42e-56	GG17113 [Drosophila erecta]
Unigene0002166	0.001	5.9669	12.5428	3.21e-21	1.01e-20	--
Unigene0002167	0.249	1.9206	2.94734	1.31e-05	2.27e-05	--
Unigene0002168	0.1698	1.6992	3.32295	0.0074061	0.0104079	--
Unigene0002178	0.001	0.3091	8.27193	0.00782344	0.0109487	Ubiquitin-protein ligase E3C [Zootermopsis nevadensis]
Unigene0002182	0.0969	309.251	11.64	0	0	--
Unigene0002191	0.001	8.0421	12.9734	6.17e-21	1.92e-20	--
Unigene0002194	0.0508	9.3939	7.53075	1.21e-117	1.05e-116	--
Unigene0002205	0.001	4.4629	12.1238	3.96e-11	9.13e-11	--
Unigene0002206	0.001	4.8095	12.2317	8.67e-22	2.75e-21	hydrocephalus-inducing protein homolog, partial [Clonorchis sinensis]
Unigene0002217	0.001	7.7016	12.9109	1.8e-35	7.4e-35	--
Unigene0002220	0.001	5.5545	12.4394	8.76e-26	3.02e-25	--
Unigene0002222	0.001	2.6382	11.3653	2.03e-11	4.75e-11	--
Unigene0002223	0.001	0.7063	9.46414	0.0156414	0.0212459	--
Unigene0002224	0.001	0.6215	9.27961	0.0156414	0.0212459	--
Unigene0002231	0.001	6.0561	12.5642	7.24e-37	3.03e-36	Nose resistant to fluoxetine protein 6 [Zootermopsis nevadensis]
Unigene0002239	0.0941	8.8252	6.55129	3.64e-58	1.96e-57	--
Unigene0002294	0.001	49.0672	15.5825	1.06e-116	9.11e-116	--
Unigene0002295	0.001	20.6768	14.3357	3.4e-78	2.23e-77	--
Unigene0002296	0.001	4.961	12.2764	3.96e-11	9.13e-11	--
Unigene0002299	0.0668	6.7281	6.65421	2.11e-32	8.25e-32	--
Unigene0002320	0.2818	11.1682	5.30858	2.52e-91	1.84e-90	--
Unigene0002352	0.2449	5.9219	4.5958	5.69e-40	2.49e-39	--
Unigene0002368	0.001	6.314	12.6243	3.4e-17	9.61e-17	--
Unigene0002398	0.001	14.302	13.8039	5.08e-199	6.71e-198	PREDICTED: UPF0704 protein C6orf165 homolog [Aplysia californica]
Unigene0002399	0.001	16.6889	14.0266	1.07e-144	1.08e-143	PREDICTED: UPF0704 protein C6orf165 homolog [Strongylocentrotus purpuratus]
Unigene0002403	0.1028	2.701	4.71558	6.85e-08	1.35e-07	sorbitol dehydrogenase-1 [Artemia sinica]
Unigene0002407	0.001	3.4636	11.7581	4.58e-12	1.1e-11	--
Unigene0002408	0.0875	29.0624	8.37566	0	6.08e-308	--
Unigene0002413	0.001	30.1011	14.8775	5.66e-145	5.74e-144	--
Unigene0002419	0.001	3.8138	11.897	1.78e-15	4.8e-15	--
Unigene0002470	0.2553	4.4972	4.13876	6.87e-28	2.47e-27	--
Unigene0002478	0.001	1.3493	10.398	0.000276113	0.000432611	--
Unigene0002479	0.001	0.7666	9.58233	0.00782344	0.0109487	--
Unigene0002544	0.0771	12.7923	7.37433	1e-104	8.01e-104	PREDICTED: cysteine sulfinic acid decarboxylase [Athalia rosae]
Unigene0002566	0.001	14.6409	13.8377	9.86e-134	9.36e-133	--
Unigene0002570	0.001	2.593	11.3404	3.01e-06	5.44e-06	--
Unigene0002573	0.2933	5.1346	4.1298	1.19e-18	3.49e-18	--
Unigene0002577	0.2442	7.6662	4.97238	3.17e-44	1.46e-43	--
Unigene0002580	0.06	2.9268	5.60822	3.41e-15	9.13e-15	PREDICTED: peroxidase-like [Acyrthosiphon pisum]
Unigene0002581	0.001	2.6943	11.3957	5.78e-06	1.02e-05	peroxinectin [Pacifastacus leniusculus]
Unigene0002598	0.001	6.4321	12.6511	4.29e-63	2.44e-62	PREDICTED: protein CutA homolog [Megachile rotundata]
Unigene0002606	0.0851	12.427	7.1901	0	3.9e-308	PREDICTED: CTL-like protein 2 isoform X1 [Tribolium castaneum]
Unigene0002620	0.001	3.7073	11.8562	2.03e-11	4.75e-11	--
Unigene0002622	0.1861	156.848	9.71907	0	0	--
Unigene0002651	0.2161	2.6575	3.6203	7.39e-18	2.13e-17	--
Unigene0002653	0.0445	11.3864	7.99929	0	0	PREDICTED: sperm-associated antigen 17-like isoform X5 [Saccoglossus kowalevskii]
Unigene0002659	0.001	5.6568	12.4658	1.23e-65	7.16e-65	PREDICTED: dynein heavy chain 7, axonemal isoform X1 [Strongylocentrotus purpuratus]
Unigene0002684	0.1225	12.1503	6.63207	5.92e-151	6.21e-150	PREDICTED: galactosylgalactosylxylosylprotein 3-beta-glucuronosyltransferase P [Tribolium castaneum]
Unigene0002698	0.001	13.1642	13.6843	3.18e-136	3.07e-135	cathepsin D [Clonorchis sinensis]
Unigene0002700	0.0788	4.9258	5.96602	3.52e-20	1.07e-19	PREDICTED: meiosis 1 arrest protein-like [Crassostrea gigas]
Unigene0002706	0.001	2.5724	11.3289	1.11e-05	1.92e-05	--
Unigene0002721	0.001	20.1554	14.2989	1.77e-106	1.43e-105	--
Unigene0002724	0.1089	6.5028	5.89999	2.33e-36	9.67e-36	--
Unigene0002725	0.2712	2.2897	3.07773	0.000537698	0.000824613	PREDICTED: ankyrin repeat and SAM domain-containing protein 3-like [Crassostrea gigas]
Unigene0002726	0.2664	2.4984	3.22934	0.000104826	0.000170546	--
Unigene0002733	0.001	7.0537	12.7842	4.04e-43	1.83e-42	--
Unigene0002767	0.08	3.6002	5.49193	7.95e-14	2.04e-13	--
Unigene0002768	0.24	5.8535	4.60819	2.35e-27	8.34e-27	--
Unigene0002776	0.1205	77.2259	9.32391	0	0	alpha amylase [Drosophila pseudoobscura]
Unigene0002778	0.048	52.5487	10.0964	0	0	--
Unigene0002780	0.001	21.8133	14.4129	9.19e-240	1.41e-238	cytochrome c oxidase subunit IV [Culex quinquefasciatus]
Unigene0002791	0.001	10.3484	13.3371	9.02e-152	9.51e-151	PREDICTED: zinc metalloproteinase nas-17-like [Saccoglossus kowalevskii]
Unigene0002813	0.001	2.8213	11.4621	1.14e-07	2.23e-07	--
Unigene0002814	0.001	2.8413	11.4723	5.78e-06	1.02e-05	--
Unigene0002836	0.2258	1.2705	2.49228	0.00756354	0.0106159	--
Unigene0002837	0.2502	11.6326	5.53895	1.25e-147	1.29e-146	PT repeat family protein, related [Eimeria tenella]
Unigene0002867	0.001	3.4264	11.7425	1.57e-08	3.21e-08	--
Unigene0002869	0.0884	2.3207	4.71437	1.09e-15	2.95e-15	Chloride channel CLIC-like protein 1, partial [Stegodyphus mimosarum]
Unigene0002883	0.001	25.2315	14.6229	0	0	PREDICTED: protein takeout isoform X2 [Musca domestica]
Unigene0002892	0.001	107.37	16.7122	0	0	--
Unigene0002936	0.001	3.3198	11.6969	1.27e-16	3.54e-16	ATP-binding cassette sub-family G member 8, partial [Stegodyphus mimosarum]
Unigene0002952	0.0816	34.6889	8.73169	1.6e-266	2.71e-265	--
Unigene0002953	0.001	6.4841	12.6627	9.23e-32	3.57e-31	PREDICTED: histone-lysine N-methyltransferase SETMAR-like [Cerapachys biroi]
Unigene0002972	0.031	26.9099	9.76165	3.34e-275	5.84e-274	--
Unigene0002980	0.001	5.3669	12.3899	1.29e-32	5.06e-32	PREDICTED: protein SpAN-like [Crassostrea gigas]
Unigene0002984	0.001	1.4056	10.457	0.000122627	0.000197706	--
Unigene0002999	0.1746	2.0749	3.57092	0.00131833	0.00196391	WD repeat-containing protein 24 [Zootermopsis nevadensis]
Unigene0003003	0.1714	2.6796	3.96658	6.66e-05	0.000109855	PREDICTED: peregrin-like, partial [Plutella xylostella]
Unigene0003009	0.178	2.7826	3.96648	6.66e-05	0.000109855	--
Unigene0003010	0.162	2.9383	4.18092	7.41e-10	1.62e-09	--
Unigene0003023	0.001	5.6963	12.4758	9.85e-36	4.06e-35	--
Unigene0003024	0.001	2.1808	11.0906	3.35e-29	1.24e-28	reverse transcriptase, partial [Lasius niger]
Unigene0003034	0.001	4.4716	12.1266	1.75e-13	4.44e-13	--
Unigene0003036	0.001	3.2571	11.6694	4.06e-52	2.06e-51	--
Unigene0003050	0.001	9.1992	13.1673	2.91e-74	1.84e-73	Serine protease snake [Zootermopsis nevadensis]
Unigene0003051	0.001	38.3498	15.2269	2.14e-229	3.17e-228	PREDICTED: calcium-activated chloride channel regulator 4-like [Ciona intestinalis]
Unigene0003081	0.001	4.426	12.1118	5.34e-12	1.28e-11	5'-nucleotidase, partial [Stegodyphus mimosarum]
Unigene0003110	0.0591	21.0804	8.47853	6.25e-115	5.33e-114	--
Unigene0003112	0.1576	2.3644	3.90713	0.000122056	0.000197267	Ras GTPase-activating-like protein IQGAP2 [Zootermopsis nevadensis]
Unigene0003129	0.001	3.3232	11.6984	8.16e-07	1.52e-06	--
Unigene0003131	0.001	4.5969	12.1664	7.17e-13	1.78e-12	profilin [Danaus plexippus]
Unigene0003132	0.001	5.1132	12.32	9.2e-16	2.5e-15	--
Unigene0003133	0.001	5.8075	12.5037	9.03e-47	4.3e-46	PREDICTED: profilin [Nasonia vitripennis]
Unigene0003152	0.001	0.6343	9.30902	0.0156414	0.0212459	--
Unigene0003155	0.001	6.9454	12.7618	4.83e-34	1.94e-33	--
Unigene0003163	0.1938	1.4141	2.86724	3.91e-05	6.58e-05	PREDICTED: acidic mammalian chitinase-like [Fopius arisanus]
Unigene0003167	0.001	0.7608	9.57137	0.0312734	0.0412699	--
Unigene0003172	0.001	13.2294	13.6915	2.29e-102	1.8e-101	PREDICTED: transcription elongation factor B polypeptide 2 [Pogonomyrmex barbatus]
Unigene0003176	0.1028	16.6776	7.34193	5.66e-152	5.97e-151	--
Unigene0003187	0.001	3.4179	11.7389	2.74e-12	6.62e-12	--
Unigene0003190	0.001	3.8586	11.9139	7.72e-11	1.76e-10	--
Unigene0003206	0.0749	6.9829	6.54272	1.3e-29	4.84e-29	--
Unigene0003207	0.001	4.111	12.0053	8.1e-09	1.68e-08	--
Unigene0003210	0.001	1.3148	10.3606	4.04e-05	6.76e-05	--
Unigene0003211	0.001	6.3785	12.639	5.38e-67	3.17e-66	--
Unigene0003215	0.001	6.7482	12.7203	2.06e-41	9.17e-41	--
Unigene0003225	0.0348	10.8269	8.28132	0	0	PREDICTED: synaptonemal complex protein 2-like isoform X1 [Crassostrea gigas]
Unigene0003228	0.2626	3.1197	3.57047	6.05e-09	1.27e-08	--
Unigene0003254	0.001	1.5499	10.598	0.000245094	0.000385742	--
Unigene0003255	0.001	0.6989	9.44894	0.0156414	0.0212459	--
Unigene0003257	0.1579	6.4172	5.34486	2.9e-24	9.7e-24	--
Unigene0003278	0.1759	10.3934	5.88477	5.35e-71	3.27e-70	RecName: Full=Lectin BRA-3; Flags: Precursor [Megabalanus rosa]
Unigene0003287	0.001	33.8385	15.0464	3.86e-285	6.93e-284	PREDICTED: hybrid signal transduction histidine kinase A [Bactrocera cucurbitae]
Unigene0003299	0.0628	5.1404	6.35497	1.93e-26	6.75e-26	--
Unigene0003311	0.001	9.7185	13.2465	1.47e-40	6.48e-40	--
Unigene0003322	0.0595	282.786	12.2145	0	0	PREDICTED: C-type mannose receptor 2-like [Crassostrea gigas]
Unigene0003326	0.001	3.8586	11.9139	3.04e-08	6.13e-08	--
Unigene0003327	0.1134	8.308	6.19501	4.26e-132	4.02e-131	PREDICTED: innexin shaking-B isoform X1 [Tribolium castaneum]
Unigene0003330	0.001	6.1535	12.5872	2.34e-26	8.17e-26	--
Unigene0003331	0.001	3.7786	11.8836	1.75e-13	4.44e-13	--
Unigene0003346	0.001	4.4713	12.1265	2.38e-28	8.66e-28	Collagen alpha [Brugia malayi]
Unigene0003348	0.1305	7.9166	5.92276	3.01e-55	1.58e-54	PREDICTED: collagen alpha-1(IV) chain-like [Acyrthosiphon pisum]
Unigene0003349	0.001	5.4582	12.4142	1.96e-37	8.28e-37	--
Unigene0003374	0.1904	98.349	9.01273	0	0	PREDICTED: C-type lectin domain family 17, member A-like [Saccoglossus kowalevskii]
Unigene0003378	0.001	6.3908	12.6418	1.64e-55	8.65e-55	PREDICTED: coiled-coil domain-containing protein 147-like isoform X1 [Saccoglossus kowalevskii]
Unigene0003417	0.001	1.9477	10.9276	2.74e-12	6.62e-12	--
Unigene0003481	0.2898	62.8849	7.76151	4.56e-268	7.8e-267	--
Unigene0003512	0.0735	0.3678	2.32311	0.0213208	0.0286354	--
Unigene0003513	0.0949	2.7307	4.84672	1.08e-08	2.23e-08	--
Unigene0003518	0.001	4.7088	12.2011	1.25e-18	3.66e-18	--
Unigene0003520	0.2396	6.0688	4.66271	7.02e-15	1.86e-14	--
Unigene0003531	0.0613	11.0008	7.48751	1.76e-57	9.44e-57	--
Unigene0003532	0.0279	5.7136	7.67799	1.37e-65	7.98e-65	--
Unigene0003537	0.001	3.8284	11.9025	8.64e-28	3.1e-27	--
Unigene0003544	0.0871	7.7762	6.48025	1.64e-109	1.35e-108	endonuclease/exonuclease/phosphatase family protein [Plasmodium knowlesi strain H]
Unigene0003589	0.001	1.0547	10.0426	0.000145836	0.000233094	--
Unigene0003599	0.001	3.4897	11.7689	2.15e-09	4.6e-09	--
Unigene0003611	0.129	5.082	5.29995	1.89e-23	6.23e-23	--
Unigene0003656	0.001	5.7741	12.4954	2.34e-22	7.5e-22	Collagen alpha-1(IV) chain, partial [Cerapachys biroi]
Unigene0003657	0.1882	7.0896	5.23537	7.89e-44	3.62e-43	--
Unigene0003658	0.2283	7.4507	5.02837	1.24e-46	5.9e-46	--
Unigene0003692	0.001	1.6999	10.7312	0.000145836	0.000233094	--
Unigene0003704	0.001	4.7317	12.2081	4.58e-12	1.1e-11	--
Unigene0003721	0.001	2.8674	11.4855	1.4e-12	3.43e-12	--
Unigene0003743	0.001	0.5806	9.1814	0.0156414	0.0212459	--
Unigene0003747	0.001	4.6228	12.1746	1.21e-26	4.25e-26	--
Unigene0003748	0.177	6.308	5.15536	4.08e-51	2.05e-50	--
Unigene0003749	0.1973	4.6467	4.55774	1.13e-19	3.42e-19	--
Unigene0003760	0.0989	4.8837	5.62586	1.25e-29	4.66e-29	integrase core domain protein [Lasius niger]
Unigene0003773	0.278	5.1866	4.22163	3.24e-29	1.2e-28	--
Unigene0003774	0.001	5.9125	12.5296	2.42e-18	7.05e-18	--
Unigene0003801	0.001	41.9363	15.3559	1.14e-285	2.05e-284	--
Unigene0003803	0.001	17.7275	14.1137	1e-127	9.25e-127	PREDICTED: uncharacterized protein LOC105249821 [Camponotus floridanus]
Unigene0003804	0.001	4.8189	12.2345	1.5e-10	3.38e-10	beta tubulin [Miliammina fusca]
Unigene0003805	0.001	5.3764	12.3924	5.47e-51	2.74e-50	beta-tubulin [Allogromia laticollaris]
Unigene0003806	0.001	4.2628	12.0576	2.39e-12	5.79e-12	--
Unigene0003807	0.001	3.8211	11.8998	1.04e-11	2.46e-11	--
Unigene0003832	0.001	5.4261	12.4057	4.53e-20	1.38e-19	--
Unigene0003873	0.0585	1372.04	14.5175	0	0	--
Unigene0003888	0.2063	7.5452	5.19274	3.68e-22	1.18e-21	--
Unigene0003889	0.001	7.6195	12.8955	4.5e-22	1.44e-21	--
Unigene0003890	0.001	6.9357	12.7598	1.78e-15	4.8e-15	--
Unigene0003891	0.001	5.9687	12.5432	6.17e-21	1.92e-20	--
Unigene0003905	0.001	1.6761	10.7109	2.2e-07	4.23e-07	--
Unigene0003906	0.0617	3.0869	5.64474	1.81e-15	4.89e-15	--
Unigene0003942	0.001	4.1229	12.0094	8.1e-09	1.68e-08	PREDICTED: tRNA modification GTPase GTPBP3, mitochondrial-like [Diaphorina citri]
Unigene0003946	0.001	4.6979	12.1978	3.24e-27	1.15e-26	PREDICTED: DNA replication ATP-dependent helicase/nuclease DNA2-like [Diaphorina citri]
Unigene0003951	0.1471	12.1583	6.369	1.74e-291	3.19e-290	PREDICTED: IQ and AAA domain-containing protein 1-like isoform X4 [Crassostrea gigas]
Unigene0003953	0.001	4.8589	12.2464	6.62e-15	1.75e-14	--
Unigene0003959	0.001	8.1252	12.9882	3.02e-171	3.51e-170	telomerase reverse transcriptase [Daphnia pulex]
Unigene0003977	0.001	3.0408	11.5702	8.79e-28	3.15e-27	--
Unigene0003978	0.001	3.832	11.9039	4.53e-26	1.57e-25	--
Unigene0003979	0.001	5.4206	12.4042	8.68e-45	4.04e-44	--
Unigene0003988	0.1475	13.2052	6.48425	1.37e-162	1.53e-161	--
Unigene0003993	0.1371	3.8586	4.81478	2e-08	4.07e-08	--
Unigene0003997	0.001	38.4518	15.2308	0	0	Nek protein [Sphaerechinus granularis]
Unigene0004030	0.2843	23.1768	6.34912	0	0	techylectin-5B isoform [Tachypleus tridentatus]
Unigene0004039	0.001	4.7062	12.2003	1.75e-13	4.44e-13	--
Unigene0004062	0.0852	7.0692	6.37455	1.46e-101	1.14e-100	Intraflagellar transport protein 74-like protein, partial [Stegodyphus mimosarum]
Unigene0004090	0.031	4.824	7.28182	1.24e-49	6.13e-49	Retrovirus-related Pol polyprotein from transposon 412, partial [Stegodyphus mimosarum]
Unigene0004106	0.0638	4.9097	6.26593	1.74e-24	5.84e-24	hypothetical protein HELRODRAFT_173812 [Helobdella robusta]
Unigene0004111	0.1092	4.0293	5.20548	1.1e-11	2.59e-11	PREDICTED: DNA-dependent protein kinase catalytic subunit-like [Aplysia californica]
Unigene0004130	0.001	11.4714	13.4858	2.11e-68	1.26e-67	C-type lectin protein [Aphelenchus avenae]
Unigene0004136	0.001	7.5259	12.8776	9.03e-47	4.3e-46	--
Unigene0004143	0.001	4.3982	12.1027	9.2e-16	2.5e-15	PREDICTED: coiled-coil domain-containing protein 13-like [Saccoglossus kowalevskii]
Unigene0004144	0.1511	6.5911	5.44694	1.42e-51	7.16e-51	--
Unigene0004178	0.2689	15.5838	5.85683	3.26e-53	1.68e-52	--
Unigene0004192	0.001	8.451	13.0449	8.76e-26	3.02e-25	--
Unigene0004227	0.001	4.8416	12.2413	1.69e-23	5.58e-23	--
Unigene0004238	0.001	2.4319	11.2479	1.11e-05	1.92e-05	--
Unigene0004252	0.001	5.9006	12.5266	8.21e-63	4.66e-62	PREDICTED: zinc finger MYND domain-containing protein 10-like [Aplysia californica]
Unigene0004253	0.001	3.3331	11.7026	1.57e-08	3.21e-08	PREDICTED: zinc finger MYND domain-containing protein 10-like [Aplysia californica]
Unigene0004254	0.001	4.3945	12.1015	2.15e-09	4.6e-09	--
Unigene0004293	0.1458	7.3222	5.65021	1.1e-45	5.16e-45	--
Unigene0004338	0.0423	41.6514	9.94349	3.41036673888091e-310	0	--
Unigene0004339	0.001	21.3865	14.3844	5.63e-44	2.59e-43	--
Unigene0004340	0.001	24.3029	14.5688	1.25e-82	8.49e-82	--
Unigene0004370	0.001	0.8239	9.68633	0.00782344	0.0109487	PREDICTED: thrombospondin type-1 domain-containing protein 4-like, partial [Diaphorina citri]
Unigene0004372	0.0789	3.1593	5.32344	8.65e-13	2.14e-12	PREDICTED: A disintegrin and metalloproteinase with thrombospondin motifs 9 [Orussus abietinus]
Unigene0004382	0.28	5.5581	4.31109	8.55e-22	2.71e-21	PREDICTED: Fanconi anemia group D2 protein-like, partial [Saccoglossus kowalevskii]
Unigene0004387	0.001	8.2934	13.0177	1.1e-68	6.61e-68	PREDICTED: EF-hand calcium-binding domain-containing protein 10 [Strongylocentrotus purpuratus]
Unigene0004402	0.001	11.5856	13.5	1.99e-121	1.77e-120	sperm flagellar protein 1 [Strigomonas culicis]
Unigene0004403	0.1904	19.4615	6.67545	1.61e-64	9.27e-64	--
Unigene0004404	0.001	22.3523	14.4481	1.59e-203	2.14e-202	hypothetical protein DAPPUDRAFT_221022 [Daphnia pulex]
Unigene0004414	0.0239	62.3492	11.3491	0	0	GG18167 [Drosophila erecta]
Unigene0004503	0.1865	161.73	9.76019	0	0	--
Unigene0004505	0.001	7.5318	12.8788	4.08e-87	2.87e-86	--
Unigene0004506	0.001	11.3435	13.4696	3.22e-71	1.98e-70	--
Unigene0004522	0.001	1.8358	10.8422	6.14e-05	0.000101469	polyubiquitin, partial [Reticulomyxa filosa]
Unigene0004524	0.001	0.9502	9.89209	0.00391328	0.00561741	polyubiquitin, partial [Reticulomyxa filosa]
Unigene0004525	0.001	3.4554	11.7546	1.04e-11	2.46e-11	polyubiquitin [Reticulomyxa filosa]
Unigene0004526	0.001	8.1126	12.9859	1.1e-52	5.65e-52	polyubiquitin [Reticulomyxa filosa]
Unigene0004545	0.0995	19.5418	7.61765	1.28e-63	7.33e-63	--
Unigene0004546	0.001	3.5175	11.7803	7.17e-13	1.78e-12	--
Unigene0004547	0.1597	7.1402	5.48253	1.51e-78	9.97e-78	PREDICTED: venom allergen 3-like [Vollenhovia emeryi]
Unigene0004552	0.283	7.9799	4.8175	3.89e-85	2.7e-84	PREDICTED: protein NRDE2 homolog [Crassostrea gigas]
Unigene0004562	0.001	11.3952	13.4761	1.73e-46	8.22e-46	--
Unigene0004578	0.1212	17.5625	7.17896	5.39e-180	6.53e-179	--
Unigene0004579	0.001	7.6813	12.9071	2.45e-30	9.23e-30	--
Unigene0004590	0.1845	6.807	5.20533	3.49e-32	1.36e-31	PREDICTED: centrosomal protein of 192 kDa-like [Saccoglossus kowalevskii]
Unigene0004591	0.2689	6.6147	4.62053	9.86e-21	3.06e-20	--
Unigene0004606	0.001	12.4724	13.6065	4.46e-246	7.04e-245	GE22436 [Drosophila yakuba]
Unigene0004635	0.001	6.0583	12.5647	1.74e-29	6.48e-29	--
Unigene0004667	0.1408	7.4824	5.73178	2.28e-32	8.93e-32	adenosine deaminase acting on tRNA 1 [Polysphondylium pallidum PN500]
Unigene0004670	0.2468	7.3313	4.89265	2.82e-34	1.14e-33	Hermansky-Pudlak syndrome 3 protein [Zootermopsis nevadensis]
Unigene0004687	0.0362	10.694	8.2066	8.8e-95	6.56e-94	--
Unigene0004703	0.0963	40.7333	8.72446	3.35e-265	5.66e-264	RecName: Full=Lectin BRA-3; Flags: Precursor [Megabalanus rosa]
Unigene0004705	0.1336	28.5503	7.73944	0	0	PREDICTED: serine racemase-like isoform X1 [Crassostrea gigas]
Unigene0004719	0.001	9.9356	13.2784	4.11e-129	3.82e-128	GPI-linked carbonic anydrase [Cherax quadricarinatus]
Unigene0004726	0.1308	4.1313	4.98116	1.26e-18	3.69e-18	--
Unigene0004727	0.1889	3.4648	4.19708	6.45e-15	1.71e-14	--
Unigene0004729	0.2197	1.4083	2.68035	2.58e-05	4.38e-05	PREDICTED: probable E3 ubiquitin-protein ligase HERC1-like [Saccoglossus kowalevskii]
Unigene0004751	0.001	2.4734	11.2723	1.11e-05	1.92e-05	--
Unigene0004764	0.001	4.7097	12.2014	2.42e-18	7.05e-18	--
Unigene0004769	0.2353	5.7388	4.60818	1.82e-20	5.59e-20	--
Unigene0004770	0.1105	6.98	5.98111	7.85e-39	3.38e-38	--
Unigene0004787	0.0904	5.4557	5.9153	1.24e-36	5.16e-36	cement protein-19k [Megabalanus rosa]
Unigene0004793	0.2773	2.5146	3.18081	0.000181736	0.000288642	PREDICTED: protein tramtrack, beta isoform-like [Atta cephalotes]
Unigene0004799	0.001	10.0018	13.288	5.56e-42	2.49e-41	--
Unigene0004809	0.001	7.0026	12.7737	6.17e-21	1.92e-20	PREDICTED: heterogeneous nuclear ribonucleoprotein L [Tribolium castaneum]
Unigene0004816	0.09	7.4827	6.37749	7.78e-102	6.11e-101	--
Unigene0004833	0.001	3.4201	11.7398	4.74e-14	1.22e-13	--
Unigene0004834	0.0809	10.9432	7.07968	4.31e-167	4.91e-166	cuticle protein [Culex quinquefasciatus]
Unigene0004837	0.001	5.2052	12.3457	1.28e-14	3.35e-14	--
Unigene0004838	0.001	10.7134	13.3871	1.09e-43	4.97e-43	--
Unigene0004839	0.001	3.717	11.8599	5.88e-08	1.17e-07	--
Unigene0004856	0.001	2.1536	11.0725	0.000145836	0.000233094	--
Unigene0004858	0.001	1.5624	10.6095	7.68e-05	0.000125849	--
Unigene0004861	0.2478	10.5515	5.41213	3.9e-110	3.22e-109	PREDICTED: protein tramtrack, beta isoform-like [Megachile rotundata]
Unigene0004863	0.001	0.7235	9.49885	0.00782344	0.0109487	--
Unigene0004885	0.2184	3.483	3.99529	5.28e-09	1.11e-08	--
Unigene0004912	0.001	7.8266	12.9342	2.45e-30	9.23e-30	--
Unigene0004954	0.1655	638.178	11.9129	0	0	Cytoplasmic polyadenylation element-binding protein 1-A [Zootermopsis nevadensis]
Unigene0004960	0.2412	6.7117	4.79838	1.35e-31	5.22e-31	--
Unigene0004983	0.001	14.3654	13.8103	4.7e-47	2.25e-46	--
Unigene0005005	0.001	10.5478	13.3647	4.89e-74	3.08e-73	--
Unigene0005013	0.0266	7.0729	8.05473	5.61e-168	6.41e-167	PREDICTED: dynein heavy chain 8, axonemal-like [Crassostrea gigas]
Unigene0005014	0.114	11.0649	6.60081	0	0	PREDICTED: dynein heavy chain 8, axonemal-like [Strongylocentrotus purpuratus]
Unigene0005016	0.2607	2448.2	13.197	0	0	--
Unigene0005024	0.001	11.3655	13.4724	2.93e-181	3.58e-180	GK18158 [Drosophila willistoni]
Unigene0005035	0.2889	4.0041	3.79284	6.93e-21	2.16e-20	PREDICTED: pecanex-like protein 4 [Crassostrea gigas]
Unigene0005087	0.1289	12.0089	6.54171	3.49e-114	2.97e-113	BRCA1-associated RING domain protein 1 [Zootermopsis nevadensis]
Unigene0005100	0.2165	5.0094	4.5322	2.84e-13	7.13e-13	--
Unigene0005138	0.001	7.3872	12.8508	6.1e-64	3.49e-63	PREDICTED: cilia- and flagella-associated protein 69-like isoform X3 [Crassostrea gigas]
Unigene0005150	0.001	5.756	12.4909	6.31e-57	3.37e-56	peroxinectin [Macrophthalmus japonicus]
Unigene0005151	0.001	5.9476	12.5381	1.44e-81	9.72e-81	PREDICTED: peroxidase-like protein [Crassostrea gigas]
Unigene0005152	0.001	6.1716	12.5914	3.97e-41	1.76e-40	PREDICTED: chorion peroxidase-like isoform X1 [Tribolium castaneum]
Unigene0005179	0.001	3.6665	11.8402	3.43e-15	9.17e-15	--
Unigene0005192	0.001	4.3267	12.0791	4.58e-12	1.1e-11	--
Unigene0005193	0.1755	4.0597	4.53183	7.81e-07	1.46e-06	--
Unigene0005227	0.001	3.6448	11.8316	1.4e-12	3.43e-12	PREDICTED: fringe glycosyltransferase isoform X2 [Pogonomyrmex barbatus]
Unigene0005231	0.1674	23.5492	7.13623	3.31e-216	4.66e-215	PREDICTED: potassium voltage-gated channel protein Shal-like isoform X3 [Apis florea]
Unigene0005233	0.001	3.7392	11.8685	7.72e-11	1.76e-10	--
Unigene0005237	0.001	9.4148	13.2007	2.73e-96	2.06e-95	--
Unigene0005238	0.001	0.6985	9.44812	0.0312734	0.0412699	--
Unigene0005242	0.2938	2.0212	2.78231	0.00149764	0.00221763	alanyl-tRNA synthetase [Gregarina niphandrodes]
Unigene0005243	0.157	8.3771	5.73761	1.35e-185	1.69e-184	PREDICTED: histone-lysine N-methyltransferase SETMAR-like [Vollenhovia emeryi]
Unigene0005244	0.001	3.092	11.5943	9.08e-18	2.6e-17	--
Unigene0005249	0.1836	7.5481	5.36148	2.22e-140	2.2e-139	PREDICTED: WD repeat-containing protein 78-like isoform X1 [Crassostrea gigas]
Unigene0005250	0.001	3.0431	11.5713	1.04e-11	2.46e-11	--
Unigene0005254	0.001	5.6503	12.4641	6.69e-33	2.64e-32	--
Unigene0005255	0.001	0.945	9.88417	0.00782344	0.0109487	--
Unigene0005256	0.001	6.903	12.753	4.74e-14	1.22e-13	--
Unigene0005268	0.1091	5.9201	5.7619	6.8e-65	3.94e-64	--
Unigene0005288	0.124	22.583	7.50875	1.97e-171	2.3e-170	--
Unigene0005322	0.0595	7.2581	6.93056	3.48e-39	1.5e-38	--
Unigene0005323	0.1161	9.8702	6.40964	7.78e-53	3.99e-52	--
Unigene0005338	0.001	4.6648	12.1876	1.4e-12	3.43e-12	--
Unigene0005339	0.1172	6.1175	5.7059	8.08e-32	3.13e-31	--
Unigene0005340	0.001	3.0411	11.5704	4.24e-07	8.05e-07	--
Unigene0005350	0.001	2.9728	11.5376	2.2e-07	4.23e-07	PREDICTED: golgi-associated plant pathogenesis-related protein 1-like [Hydra vulgaris]
Unigene0005351	0.001	0.6809	9.4113	0.00391328	0.00561741	--
Unigene0005378	0.0949	0.5639	2.57096	0.00444281	0.00633867	--
Unigene0005412	0.001	3.1525	11.6223	9.12e-14	2.33e-13	hypothetical protein LOTGIDRAFT_153369 [Lottia gigantea]
Unigene0005429	0.001	2.2081	11.1086	2.2e-07	4.23e-07	--
Unigene0005430	0.001	2.2659	11.1459	4.04e-05	6.76e-05	--
Unigene0005432	0.001	6.8219	12.736	3.7e-105	2.96e-104	--
Unigene0005433	0.001	6.0509	12.5629	1.03e-66	6.04e-66	--
Unigene0005440	0.1727	38.9938	7.81883	0	0	copper zinc superoxide dismutase [Litopenaeus vannamei]
Unigene0005469	0.132	24.1006	7.51239	1.02e-115	8.7e-115	--
Unigene0005472	0.001	3.2617	11.6714	1.04e-11	2.46e-11	--
Unigene0005494	0.001	4.806	12.2306	1.2e-20	3.71e-20	--
Unigene0005545	0.001	6.6211	12.6929	3.43e-31	1.31e-30	Hydrocephalus-inducing-like protein [Crassostrea gigas]
Unigene0005553	0.2155	4.2216	4.29203	2.69e-31	1.03e-30	Coiled-coil domain-containing protein [Zootermopsis nevadensis]
Unigene0005559	0.0301	24.6008	9.67473	9.27e-260	1.53e-258	PREDICTED: MORN repeat-containing protein 3-like [Saccoglossus kowalevskii]
Unigene0005567	0.001	9.0004	13.1358	1.77e-106	1.43e-105	--
Unigene0005587	0.001	8.5958	13.0694	1.57e-62	8.9e-62	--
Unigene0005600	0.295	4.0123	3.76564	5.95e-14	1.53e-13	--
Unigene0005601	0.001	2.0247	10.9835	4.04e-05	6.76e-05	--
Unigene0005602	0.1331	10.3173	6.27641	1.09e-94	8.11e-94	cuticular protein [Artemia franciscana]
Unigene0005631	0.001	1.5321	10.5813	5.78e-06	1.02e-05	--
Unigene0005640	0.001	6.9221	12.757	4.46e-56	2.36e-55	--
Unigene0005649	0.001	2.1924	11.0983	1.11e-05	1.92e-05	--
Unigene0005650	0.001	3.6481	11.8329	5.34e-12	1.28e-11	--
Unigene0005663	0.001	3.834	11.9046	5.34e-12	1.28e-11	--
Unigene0005664	0.0841	6.735	6.32343	2.93e-50	1.46e-49	--
Unigene0005697	0.001	7.8267	12.9342	6.04e-55	3.16e-54	--
Unigene0005699	0.001	1.5385	10.5873	0.000145836	0.000233094	--
Unigene0005753	0.1275	18.4141	7.17417	1.26e-306	2.4e-305	--
Unigene0005760	0.001	9.4112	13.2002	3.21e-21	1.01e-20	--
Unigene0005814	0.1238	1.1614	3.22978	0.0129695	0.0177627	--
Unigene0005823	0.1433	7.4682	5.70365	6.41e-47	3.06e-46	--
Unigene0005825	0.127	10.7749	6.4067	1.02e-153	1.09e-152	PREDICTED: trypsin-1 isoform X2 [Fopius arisanus]
Unigene0005834	0.1631	2.8557	4.13002	1.96e-05	3.37e-05	--
Unigene0005895	0.001	4.9772	12.2811	2.46e-14	6.4e-14	PREDICTED: dynein heavy chain 3, axonemal-like [Aplysia californica]
Unigene0005896	0.001	5.0381	12.2987	1.25e-18	3.66e-18	PREDICTED: dynein heavy chain 3, axonemal-like [Ciona intestinalis]
Unigene0005897	0.001	7.3933	12.852	3.43e-73	2.14e-72	PREDICTED: dynein heavy chain 3, axonemal-like [Saccoglossus kowalevskii]
Unigene0005898	0.0503	5.1902	6.68909	3.06e-33	1.21e-32	PREDICTED: LOW QUALITY PROTEIN: dynein heavy chain 3, axonemal [Strongylocentrotus purpuratus]
Unigene0005899	0.1646	2.6753	4.02266	3.62e-05	6.11e-05	--
Unigene0005900	0.1172	5.9344	5.66206	9.63e-16	2.61e-15	PREDICTED: dynein heavy chain 3, axonemal [Amphimedon queenslandica]
Unigene0005918	0.001	14.4053	13.8143	8.52e-132	8.02e-131	--
Unigene0005923	0.001	2.6487	11.3711	5.78e-06	1.02e-05	--
Unigene0005988	0.2162	7.9087	5.193	3.27e-42	1.47e-41	--
Unigene0005989	0.001	4.8516	12.2442	4.58e-12	1.1e-11	--
Unigene0005995	0.001	7.318	12.8372	2.11e-68	1.26e-67	actin, partial [Reticulomyxa filosa]
Unigene0005996	0.001	3.8782	11.9212	2.46e-14	6.4e-14	ubiquitin/actin fusion protein 1 [Lotharella globosa]
Unigene0005997	0.001	2.5074	11.292	8.16e-07	1.52e-06	actin 5C/42A [Glomeris marginata]
Unigene0006011	0.0606	10.0683	7.37629	1e-104	8.01e-104	--
Unigene0006024	0.1168	106.862	9.83749	0	0	PREDICTED: chorion peroxidase-like [Acyrthosiphon pisum]
Unigene0006033	0.001	2.2772	11.153	2.12e-05	3.61e-05	--
Unigene0006034	0.001	17.2674	14.0758	1.18e-92	8.7e-92	PREDICTED: profilin [Fopius arisanus]
Unigene0006035	0.001	0.7566	9.56339	0.00782344	0.0109487	--
Unigene0006037	0.001	2.2339	11.1253	2.2e-07	4.23e-07	--
Unigene0006077	0.001	2.4767	11.2742	4.04e-05	6.76e-05	--
Unigene0006084	0.1755	7.4063	5.39921	2.36e-25	8.07e-25	--
Unigene0006119	0.001	6.7659	12.7241	3.43e-31	1.31e-30	Hydrocephalus-inducing-like protein [Crassostrea gigas]
Unigene0006120	0.001	3.8465	11.9093	2.74e-12	6.62e-12	--
Unigene0006131	0.0726	4.8573	6.06404	1.37e-41	6.12e-41	--
Unigene0006134	0.001	107.579	16.715	0	0	--
Unigene0006135	0.001	12.9648	13.6623	6.05e-130	5.65e-129	GJ16779 [Drosophila virilis]
Unigene0006136	0.1351	1.5209	3.49283	6.27e-06	1.1e-05	--
Unigene0006151	0.058	2.6853	5.53289	4.24e-14	1.1e-13	--
Unigene0006152	0.001	0.882	9.78463	0.00195752	0.00287421	--
Unigene0006178	0.1308	8.4807	6.01875	1.24e-59	6.77e-59	PREDICTED: threonine dehydratase biosynthetic, chloroplastic-like [Crassostrea gigas]
Unigene0006195	0.001	1.8671	10.8666	0.000145836	0.000233094	--
Unigene0006229	0.001	2.9645	11.5336	1.11e-09	2.4e-09	--
Unigene0006230	0.1755	7.132	5.34476	2.9e-24	9.7e-24	--
Unigene0006233	0.001	466.581	18.8318	0	0	calcium binding EGF domain protein [Dictyocaulus viviparus]
Unigene0006239	0.2614	6.5369	4.64428	5.29e-41	2.34e-40	PREDICTED: C-type lectin mannose-binding isoform-like [Saccoglossus kowalevskii]
Unigene0006245	0.001	6.9822	12.7695	4.58e-28	1.65e-27	--
Unigene0006246	0.1603	16.1358	6.65335	2.06e-63	1.17e-62	--
Unigene0006255	0.1527	8.0195	5.71474	4.3e-32	1.67e-31	PREDICTED: THAP domain-containing protein 1-like [Crassostrea gigas]
Unigene0006262	0.0933	8.0865	6.43749	9.54e-81	6.4e-80	PREDICTED: CD151 antigen [Acyrthosiphon pisum]
Unigene0006274	0.001	8.6027	13.0706	6.71e-139	6.57e-138	tetraspanin [Scylla paramamosain]
Unigene0006283	0.1536	3.4583	4.49281	1.43e-06	2.63e-06	--
Unigene0006302	0.001	10.8697	13.408	2.6e-84	1.79e-83	PREDICTED: neurexin-4 isoform X4 [Bombus impatiens]
Unigene0006319	0.001	14.0027	13.7734	1.49e-158	1.63e-157	--
Unigene0006331	0.0665	10.9107	7.35817	2.37e-103	1.88e-102	--
Unigene0006342	0.001	2.906	11.5048	8.16e-07	1.52e-06	--
Unigene0006355	0.001	2.4922	11.2832	8.1e-09	1.68e-08	polyprotein [Mizuhopecten yessoensis]
Unigene0006358	0.001	20.6019	14.3305	8.41e-261	1.4e-259	PREDICTED: band 7 protein AGAP004871-like [Strongylocentrotus purpuratus]
Unigene0006360	0.001	19.0758	14.2195	9e-94	6.67e-93	--
Unigene0006361	0.001	3.0227	11.5616	2.93e-10	6.49e-10	bel12-ag transposon polyprotein [Lasius niger]
Unigene0006383	0.001	1.694	10.7262	3.96e-11	9.13e-11	PREDICTED: trichohyalin-like [Bombus terrestris]
Unigene0006386	0.1175	7.1469	5.92658	5.18e-126	4.73e-125	PREDICTED: sperm-associated antigen 1-like isoform X2 [Microplitis demolitor]
Unigene0006388	0.001	0.6406	9.32328	0.0312734	0.0412699	--
Unigene0006422	0.1605	4.2823	4.73774	7.25e-23	2.36e-22	PREDICTED: cilia- and flagella-associated protein 74 [Strongylocentrotus purpuratus]
Unigene0006423	0.102	6.3459	5.95918	5.25e-38	2.24e-37	PREDICTED: cilia- and flagella-associated protein 74-like [Aplysia californica]
Unigene0006427	0.2281	23.3349	6.67668	3.51e-216	4.95e-215	--
Unigene0006428	0.0668	7.5848	6.82712	9.13e-72	5.63e-71	--
Unigene0006429	0.0948	13.0727	7.10745	2.58e-87	1.82e-86	--
Unigene0006430	0.0527	10.793	7.67808	1.1e-129	1.02e-128	--
Unigene0006459	0.2958	3.9151	3.72636	1.29e-19	3.87e-19	--
Unigene0006461	0.2116	7.188	5.08618	8.07e-30	3.02e-29	--
Unigene0006462	0.086	7.8367	6.50977	2.24e-84	1.55e-83	GH14849 [Drosophila grimshawi]
Unigene0006501	0.2885	3.0067	3.38154	1.83e-07	3.54e-07	Dual specificity testis-specific protein kinase 2, partial [Stegodyphus mimosarum]
Unigene0006511	0.0451	19.2623	8.73844	4.13e-268	7.07e-267	PREDICTED: zinc transporter ZIP1-like [Atta cephalotes]
Unigene0006512	0.001	0.3644	8.50938	3.04e-08	6.13e-08	PREDICTED: MFS-type transporter SLC18B1-like [Ceratosolen solmsi marchali]
Unigene0006513	0.0151	3.529	7.86857	4.53e-75	2.88e-74	PREDICTED: MFS-type transporter SLC18B1-like [Bombus impatiens]
Unigene0006567	0.001	7.7264	12.9156	3.35e-114	2.85e-113	--
Unigene0006568	0.001	4.1994	12.036	6.32e-25	2.14e-24	--
Unigene0006569	0.001	4.7997	12.2287	6.62e-15	1.75e-14	--
Unigene0006578	0.001	6.9048	12.7534	1.24e-77	8.08e-77	--
Unigene0006579	0.0343	8.1598	7.89418	5.1e-77	3.3e-76	Gamma-aminobutyric acid A receptor/Glycine receptor alpha family and Neurotransmitter-gated ion-channel transmembrane domain and Neurotransmitter-gated ion-channel family and Neurotransmitter-gated ion-channel ligand-binding domain-containing protein [Strongyloides ratti]
Unigene0006594	0.001	8.7868	13.1011	4.6e-72	2.84e-71	--
Unigene0006648	0.001	114.424	16.804	0	0	hypothetical protein LOTGIDRAFT_171009 [Lottia gigantea]
Unigene0006649	0.001	184.996	17.4971	0	0	PREDICTED: axoneme-associated protein mst101(2)-like [Saccoglossus kowalevskii]
Unigene0006661	0.001	17.5586	14.0999	3.72e-187	4.67e-186	--
Unigene0006676	0.1763	4.2996	4.6081	4.26e-07	8.09e-07	--
Unigene0006691	0.123	13.6909	6.79842	4.49e-137	4.34e-136	radial spoke head 9 homolog-like [Saccoglossus kowalevskii]
Unigene0006714	0.001	8.4162	13.039	8.21e-63	4.66e-62	--
Unigene0006726	0.1496	15.4788	6.69304	4.39e-219	6.27e-218	PREDICTED: uncharacterized protein LOC102804999 [Saccoglossus kowalevskii]
Unigene0006738	0.001	6.9871	12.7705	8.24e-70	5e-69	--
Unigene0006741	0.001	7.4782	12.8685	1.23e-65	7.16e-65	PREDICTED: leucine-rich repeat-containing protein 43-like [Aplysia californica]
Unigene0006742	0.001	4.1028	12.0024	3.43e-15	9.17e-15	--
Unigene0006745	0.001	2.4841	11.2785	1.11e-05	1.92e-05	--
Unigene0006747	0.2732	3.8443	3.81469	1.05e-07	2.07e-07	--
Unigene0006748	0.001	4.9019	12.2591	1.78e-31	6.85e-31	--
Unigene0006749	0.0692	6.6858	6.59418	2.26e-60	1.25e-59	PREDICTED: coiled-coil domain-containing protein 180-like [Saccoglossus kowalevskii]
Unigene0006751	0.1286	6.0022	5.54453	7.35e-42	3.29e-41	--
Unigene0006765	0.1943	8.1747	5.39481	2.39e-120	2.11e-119	PREDICTED: T-complex-associated testis-expressed protein 1 [Strongylocentrotus purpuratus]
Unigene0006770	0.001	6.1977	12.5975	3.47e-33	1.37e-32	splicing factor 45 [Danaus plexippus]
Unigene0006772	0.2576	5.194	4.33364	2.53e-22	8.12e-22	--
Unigene0006773	0.2474	9.7453	5.29979	6.86e-35	2.79e-34	--
Unigene0006786	0.001	3.3184	11.6963	5.7e-10	1.25e-09	PREDICTED: protein spinster homolog 1-like isoform X2 [Aplysia californica]
Unigene0006799	0.001	0.4649	8.86078	0.00782344	0.0109487	--
Unigene0006808	0.001	9.351	13.1909	1.21e-56	6.45e-56	--
Unigene0006822	0.001	7.176	12.809	6.1e-64	3.49e-63	--
Unigene0006842	0.1196	4.2264	5.14314	2.43e-21	7.63e-21	--
Unigene0006843	0.001	2.2189	11.1156	2.74e-12	6.62e-12	--
Unigene0006847	0.0541	8.348	7.26966	2.78e-97	2.11e-96	hypothetical protein X975_09422, partial [Stegodyphus mimosarum]
Unigene0006848	0.001	8.1133	12.9861	6.42e-66	3.75e-65	--
Unigene0006863	0.001	6.0578	12.5646	4.04e-43	1.83e-42	--
Unigene0006889	0.001	1.0093	9.97914	0.000245094	0.000385742	Histone deacetylase 8 [Zootermopsis nevadensis]
Unigene0006892	0.001	0.6355	9.31175	0.0312734	0.0412699	Histone deacetylase 8 [Zootermopsis nevadensis]
Unigene0006895	0.1387	3.5551	4.67985	1.26e-07	2.47e-07	--
Unigene0006925	0.001	9.3147	13.1853	4.99e-51	2.51e-50	PREDICTED: RNA-directed DNA polymerase from mobile element jockey-like [Hydra vulgaris]
Unigene0006934	0.001	5.8038	12.5028	2.33e-20	7.16e-20	hydrocephalus-inducing protein homolog [Clonorchis sinensis]
Unigene0006935	0.1774	8.5061	5.58342	3.18e-43	1.45e-42	Hydrocephalus-inducing-like protein [Crassostrea gigas]
Unigene0006936	0.001	5.6592	12.4664	6.69e-33	2.64e-32	PREDICTED: hydrocephalus-inducing protein homolog [Strongylocentrotus purpuratus]
Unigene0006940	0.0786	5.4561	6.1172	3.02e-43	1.37e-42	PREDICTED: hydrocephalus-inducing protein homolog [Strongylocentrotus purpuratus]
Unigene0006941	0.1649	15.1593	6.52247	8.2e-58	4.41e-57	PREDICTED: polycystin-1-like isoform X3 [Crassostrea gigas]
Unigene0006954	0.001	8.9507	13.1278	4.5e-22	1.44e-21	--
Unigene0006959	0.001	16.0032	13.9661	2.48e-192	3.19e-191	alpha-carbonic anhydrase [Daphnia pulex]
Unigene0006965	0.1999	8.0921	5.33916	6.87e-48	3.32e-47	Acidic mammalian chitinase [Trichuris trichiura]
Unigene0006968	0.001	32.197	14.9746	6.99e-247	1.11e-245	PREDICTED: flocculation protein FLO11 [Strongylocentrotus purpuratus]
Unigene0006980	0.2134	11.1865	5.71205	2.41e-93	1.78e-92	PREDICTED: intraflagellar transport protein 57 homolog [Aplysia californica]
Unigene0006984	0.2654	6.0575	4.51248	3.12e-25	1.07e-24	Intraflagellar transport protein 57-like protein [Zootermopsis nevadensis]
Unigene0006991	0.001	17.9945	14.1353	1.58e-101	1.23e-100	--
Unigene0007006	0.001	4.1736	12.0271	2.74e-12	6.62e-12	--
Unigene0007007	0.1097	5.9679	5.76559	1.82e-33	7.23e-33	--
Unigene0007012	0.001	4.4958	12.1344	6.29e-23	2.05e-22	--
Unigene0007058	0.0309	16.3603	9.04838	5.45e-170	6.3e-169	PREDICTED: uncharacterized peptidase C1-like protein F26E4.3 isoform X3 [Pogonomyrmex barbatus]
Unigene0007059	0.1435	23.3421	7.34574	0	0	Protein Bm3618 [Brugia malayi]
Unigene0007083	0.001	4.1813	12.0297	4.38e-20	1.34e-19	reverse transcriptase [Bombyx mori]
Unigene0007084	0.0869	3.4238	5.3001	1.64e-12	4e-12	RNA-directed DNA polymerase (reverse transcriptase) domain containing protein [Haemonchus contortus]
Unigene0007085	0.001	6.1955	12.597	1.22e-24	4.11e-24	PREDICTED: retrovirus-related Pol polyprotein from transposon opus [Tribolium castaneum]
Unigene0007086	0.001	3.157	11.6243	3.96e-11	9.13e-11	protein kinase C, putative [Ixodes scapularis]
Unigene0007088	0.001	12.1735	13.5715	2.25e-92	1.66e-91	--
Unigene0007108	0.0375	18.4836	8.94514	7.29e-308	1.4e-306	acid-sensing ion channel 5-like [Hydra vulgaris]
Unigene0007123	0.001	10.4277	13.3481	1.23e-45	5.76e-45	--
Unigene0007124	0.0831	7.4053	6.47757	7.11e-56	3.76e-55	PREDICTED: probable 3',5'-cyclic phosphodiesterase pde-5 isoform X7 [Crassostrea gigas]
Unigene0007134	0.2423	29.5281	6.92915	0	0	PREDICTED: uncharacterized protein LOC100889358 [Strongylocentrotus purpuratus]
Unigene0007142	0.1194	506.035	12.0492	0	0	Cuticlin-1, partial [Cerapachys biroi]
Unigene0007145	0.001	9.5799	13.2258	1.25e-18	3.66e-18	--
Unigene0007146	0.2648	17.8528	6.0751	6.08e-218	8.65e-217	PREDICTED: lachesin [Bombyx mori]
Unigene0007148	0.1161	133.32	10.1653	0	0	--
Unigene0007149	0.001	6.8428	12.7404	6.48e-13	1.61e-12	--
Unigene0007177	0.001	6.9484	12.7625	6.69e-98	5.12e-97	--
Unigene0007232	0.0578	2.8894	5.64356	1.81e-15	4.89e-15	serine protease 14 [Anopheles quadriannulatus]
Unigene0007258	0.001	22.2164	14.4393	0	0	PREDICTED: cadherin-23 [Plutella xylostella]
Unigene0007274	0.2569	0.8233	1.68021	0.000834919	0.00126393	hypothetical protein L798_11776 [Zootermopsis nevadensis]
Unigene0007292	0.1734	1.7892	3.36714	3.44e-05	5.81e-05	--
Unigene0007322	0.001	2.4837	11.2783	3.01e-06	5.44e-06	--
Unigene0007323	0.001	0.7468	9.54458	0.0156414	0.0212459	hypothetical protein EAI_17180, partial [Harpegnathos saltator]
Unigene0007333	0.0154	21.5015	10.4473	0	0	PREDICTED: uncharacterized protein LOC100366988 [Saccoglossus kowalevskii]
Unigene0007334	0.001	17.6975	14.1113	9.11e-67	5.36e-66	--
Unigene0007346	0.001	18.5039	14.1755	2.32e-89	1.67e-88	DNA-directed RNA polymerase , related [Eimeria praecox]
Unigene0007381	0.001	1.8977	10.89	0.000145836	0.000233094	--
Unigene0007385	0.001	16.6358	14.022	9.74e-99	7.49e-98	PREDICTED: tctex1 domain-containing protein 2-like [Fopius arisanus]
Unigene0007387	0.001	4.8137	12.2329	1.11e-09	2.4e-09	--
Unigene0007388	0.0628	40.1174	9.31925	0	0	PREDICTED: alpha-N-acetylgalactosamine-specific lectin-like, partial [Strongylocentrotus purpuratus]
Unigene0007390	0.001	2.5307	11.3053	5.78e-06	1.02e-05	--
Unigene0007419	0.001	20.2189	14.3034	2.76e-134	2.63e-133	--
Unigene0007426	0.001	12.6063	13.6219	5.28e-294	9.74e-293	Sushi, von Willebrand factor type A, EGF and pentraxin domain-containing protein 1 [Schistosoma haematobium]
Unigene0007427	0.0359	14.8622	8.69345	5.42e-260	8.98e-259	ankyrin repeat protein [Trichomonas vaginalis G3]
Unigene0007428	0.2856	8.0371	4.81461	1.97e-62	1.11e-61	PREDICTED: serine/arginine repetitive matrix protein 1 [Cerapachys biroi]
Unigene0007434	0.0633	7.4137	6.87184	1.06e-109	8.71e-109	--
Unigene0007438	0.001	20.5761	14.3287	6.3e-160	6.94e-159	--
Unigene0007497	0.0788	15.5164	7.62138	6.74e-64	3.86e-63	--
Unigene0007504	0.001	3.1701	11.6303	2.2e-07	4.23e-07	--
Unigene0007506	0.001	4.5635	12.1559	2.15e-09	4.6e-09	--
Unigene0007507	0.2861	6.5417	4.51507	8.18e-43	3.7e-42	--
Unigene0007534	0.2265	3.7524	4.05023	1.57e-09	3.39e-09	--
Unigene0007561	0.001	2.8169	11.4599	2.2e-07	4.23e-07	--
Unigene0007567	0.001	32.9643	15.0086	0	0	PREDICTED: ras-related protein Rab-32-like [Amphimedon queenslandica]
Unigene0007580	0.2957	0.9431	1.67328	0.000239046	0.000377009	PREDICTED: mediator of RNA polymerase II transcription subunit 19 [Athalia rosae]
Unigene0007590	0.1023	8.9023	6.4433	8.82e-184	1.09e-182	--
Unigene0007618	0.001	4.7293	12.2074	3.32e-19	9.9e-19	--
Unigene0007631	0.001	3.3472	11.7087	3.04e-08	6.13e-08	--
Unigene0007632	0.001	3.182	11.6357	1.57e-06	2.88e-06	--
Unigene0007633	0.001	6.881	12.7484	1.57e-62	8.9e-62	PREDICTED: uncharacterized protein LOC105833138 [Monomorium pharaonis]
Unigene0007640	0.1463	3.4773	4.57097	8.31e-14	2.13e-13	PREDICTED: retinol dehydrogenase 7 [Athalia rosae]
Unigene0007641	0.1856	2.7271	3.8771	3.2e-08	6.44e-08	PREDICTED: D-beta-hydroxybutyrate dehydrogenase, mitochondrial-like [Metaseiulus occidentalis]
Unigene0007642	0.166	7.7344	5.54203	1.22e-28	4.46e-28	--
Unigene0007686	0.001	39.4096	15.2663	9.91e-287	1.79e-285	--
Unigene0007689	0.001	2.3213	11.1807	8.1e-09	1.68e-08	--
Unigene0007705	0.001	19.5513	14.255	2.54e-152	2.68e-151	--
Unigene0007713	0.001	8.9885	13.1339	8.64e-77	5.57e-76	Zinc finger protein 271, partial [Stegodyphus mimosarum]
Unigene0007714	0.001	7.0448	12.7823	4.99e-51	2.51e-50	Zinc finger protein 160, partial [Stegodyphus mimosarum]
Unigene0007715	0.001	96.0376	16.5513	0	0	--
Unigene0007732	0.084	17.4642	7.6998	1.79e-194	2.32e-193	--
Unigene0007750	0.001	2.1646	11.0799	4.04e-05	6.76e-05	--
Unigene0007769	0.1535	8.0435	5.71151	2.73e-78	1.79e-77	GJ24267 [Drosophila virilis]
Unigene0007788	0.2577	8.7747	5.08959	1.88e-123	1.69e-122	AGAP004170-PA [Anopheles gambiae str. PEST]
Unigene0007789	0.001	70.3949	16.1032	0	0	--
Unigene0007835	0.001	823.162	19.6508	0	0	PREDICTED: dnaJ homolog subfamily C member 9-like [Aplysia californica]
Unigene0007843	0.001	7.4253	12.8582	3.2e-44	1.47e-43	--
Unigene0007850	0.0475	0.3562	2.90669	0.000491667	0.00075612	PREDICTED: DDB1- and CUL4-associated factor 13 [Athalia rosae]
Unigene0007864	0.001	3.8765	11.9205	3.04e-08	6.13e-08	--
Unigene0007865	0.1107	8.8938	6.32807	1.55e-50	7.73e-50	--
Unigene0007866	0.0695	8.2311	6.88793	2.66e-74	1.68e-73	reverse transcriptase, partial [Acanthamoeba castellanii str. Neff]
Unigene0007875	0.0586	24.0123	8.67866	3.17e-258	5.22e-257	--
Unigene0007916	0.1987	57.8334	8.18517	0	0	PREDICTED: glutamate receptor ionotropic, kainate 2-like [Crassostrea gigas]
Unigene0007987	0.0465	8.2216	7.46604	2.51e-111	2.09e-110	PREDICTED: pleckstrin homology domain-containing family G member 7-like [Saccoglossus kowalevskii]
Unigene0007988	0.001	7.5868	12.8893	1.19e-20	3.67e-20	--
Unigene0007994	0.001	33.3482	15.0253	1.54e-264	2.59e-263	--
Unigene0008003	0.104	405.215	11.9279	0	0	PREDICTED: macrophage mannose receptor 1-like isoform X7 [Crassostrea gigas]
Unigene0008083	0.0704	2.2007	4.96624	8.98e-10	1.96e-09	--
Unigene0008088	0.001	18.173	14.1495	1.26e-121	1.12e-120	--
Unigene0008089	0.001	13.824	13.7549	4.73e-94	3.51e-93	--
Unigene0008096	0.001	11.2536	13.4581	6.04e-55	3.16e-54	--
Unigene0008117	0.001	7.9861	12.9633	1.04e-59	5.7e-59	PREDICTED: tudor and KH domain-containing protein [Strongylocentrotus purpuratus]
Unigene0008118	0.001	4.3291	12.0799	1.2e-20	3.71e-20	--
Unigene0008147	0.1001	9.0477	6.49804	3.84e-111	3.19e-110	PREDICTED: protein spinster homolog 1-like isoform X2 [Aplysia californica]
Unigene0008155	0.001	1.0796	10.0763	6.14e-05	0.000101469	PREDICTED: chromobox protein homolog 1-like [Hydra vulgaris]
Unigene0008162	0.2204	4.9335	4.48442	4.91e-31	1.88e-30	PREDICTED: venom protease-like [Monomorium pharaonis]
Unigene0008169	0.1633	7.2178	5.46596	1.81e-77	1.17e-76	Tripartite motif-containing protein 3 [Crassostrea gigas]
Unigene0008181	0.001	14.396	13.8134	3.22e-71	1.98e-70	--
Unigene0008182	0.001	36.7839	15.1668	6.47e-218	9.21e-217	--
Unigene0008185	0.0948	9.8712	6.70219	6.63e-66	3.87e-65	conserved hypothetical protein [Ixodes scapularis]
Unigene0008187	0.1824	4.3338	4.57045	4.26e-07	8.09e-07	--
Unigene0008198	0.001	12.0495	13.5567	1.61e-137	1.56e-136	--
Unigene0008199	0.0669	60.817	9.82825	0	0	--
Unigene0008214	0.001	0.6932	9.43713	0.00782344	0.0109487	--
Unigene0008218	0.001	11.1527	13.4451	1.76e-119	1.54e-118	--
Unigene0008239	0.241	8.5311	5.14563	1.4e-50	7.01e-50	PREDICTED: coiled-coil domain-containing protein 180-like [Ciona intestinalis]
Unigene0008254	0.1183	1.0725	3.18046	0.000181736	0.000288642	--
Unigene0008273	0.001	6.8371	12.7392	1.67e-21	5.27e-21	--
Unigene0008274	0.2545	9.4276	5.21115	3.92e-125	3.57e-124	--
Unigene0008275	0.1754	11.983	6.0942	9.45e-143	9.45e-142	--
Unigene0008303	0.001	5.6314	12.4593	1.4e-12	3.43e-12	--
Unigene0008304	0.001	3.971	11.9553	2.74e-12	6.62e-12	--
Unigene0008306	0.1762	9.6388	5.77357	3.15e-97	2.39e-96	--
Unigene0008307	0.001	12.1795	13.5722	9.36e-74	5.89e-73	--
Unigene0008308	0.001	10.409	13.3455	4.73e-94	3.51e-93	--
Unigene0008309	0.001	31.3061	14.9342	9.05e-290	1.65e-288	--
Unigene0008333	0.11	41.9792	8.57603	0	0	AAEL012522-PA [Aedes aegypti]
Unigene0008343	0.001	2.2787	11.154	1.11e-05	1.92e-05	--
Unigene0008344	0.001	21.4143	14.3863	1.21e-278	2.14e-277	CSP and TRAP-related protein (CTRP) [Plasmodium falciparum 3D7]
Unigene0008345	0.001	2.284	11.1573	7.68e-05	0.000125849	--
Unigene0008350	0.1173	17.8088	7.24624	9.83190635224081e-322	1.9812032398234e-320	PREDICTED: venom protease-like [Athalia rosae]
Unigene0008359	0.001	9.4027	13.1989	8.8e-72	5.43e-71	--
Unigene0008389	0.067	5.4425	6.34396	3.68e-26	1.28e-25	--
Unigene0008390	0.1549	3.9716	4.68031	1.26e-07	2.47e-07	--
Unigene0008391	0.0903	7.9618	6.46222	4.32e-81	2.91e-80	--
Unigene0008392	0.001	4.3699	12.0934	7.72e-11	1.76e-10	--
Unigene0008455	0.001	1.44	10.4919	8.1e-09	1.68e-08	--
Unigene0008456	0.2404	1.0899	2.18069	0.00144222	0.00214096	--
Unigene0008462	0.001	0.6678	9.38327	0.0156414	0.0212459	--
Unigene0008476	0.001	7.2499	12.8237	1.1e-68	6.61e-68	reverse transcriptase, partial [Nuttalliella namaqua]
Unigene0008477	0.0417	7.9869	7.58144	6.27e-121	5.54e-120	Tas retrotransposon peptidase A16 superfamily [Trichinella spiralis]
Unigene0008478	0.001	4.3893	12.0998	1.04e-11	2.46e-11	--
Unigene0008479	0.032	7.1497	7.80367	1.47e-72	9.11e-72	SJCHGC02418 protein [Schistosoma japonicum]
Unigene0008480	0.2523	48.9454	7.59989	1.41e-240	2.18e-239	PREDICTED: LOW QUALITY PROTEIN: integrator complex subunit 1-like [Saccoglossus kowalevskii]
Unigene0008493	0.1675	1.8856	3.49279	0.0023592	0.00344635	--
Unigene0008494	0.1936	11.2277	5.85784	2.28e-69	1.38e-68	--
Unigene0008495	0.1145	15.0048	7.03393	2.43e-201	3.23e-200	PREDICTED: homeobox protein SIX3 [Ceratitis capitata]
Unigene0008503	0.001	0.3372	8.39746	0.0156414	0.0212459	--
Unigene0008508	0.001	14.0854	13.7819	1.18e-92	8.7e-92	--
Unigene0008511	0.1759	40.5838	7.85	2.59e-146	2.64e-145	--
Unigene0008524	0.2867	4.3281	3.91612	1.96e-26	6.84e-26	Transmembrane and TPR repeat-containing protein 2, partial [Stegodyphus mimosarum]
Unigene0008560	0.076	4.3736	5.84668	3.13e-18	9.1e-18	PREDICTED: hormonally up-regulated neu tumor-associated kinase homolog A-like isoform X5 [Crassostrea gigas]
Unigene0008564	0.1594	8.8022	5.78714	3.38e-50	1.68e-49	--
Unigene0008565	0.0933	5.8899	5.98022	1.85e-20	5.69e-20	--
Unigene0008593	0.1174	11.2272	6.57942	1.52e-59	8.31e-59	serine protease inhibitor 2 [Tabanus yao]
Unigene0008610	0.0228	10.9994	8.91418	2.24e-155	2.41e-154	--
Unigene0008638	0.001	1.9013	10.8928	0.000122627	0.000197706	PREDICTED: alpha-2-macroglobulin-like isoform X2 [Athalia rosae]
Unigene0008649	0.001	0.584	9.18982	0.000489894	0.000754178	Gem-associated protein 5 [Zootermopsis nevadensis]
Unigene0008682	0.001	6.0022	12.5513	6.17e-21	1.92e-20	--
Unigene0008685	0.001	3.7663	11.8789	6.62e-15	1.75e-14	hypothetical protein HELRODRAFT_194962 [Helobdella robusta]
Unigene0008686	0.001	2.7818	11.4418	4.24e-07	8.05e-07	PREDICTED: cyclin N-terminal domain-containing protein 1-like [Aplysia californica]
Unigene0008702	0.0611	5.1766	6.40469	1.47e-52	7.5e-52	Cytochrome P450 3A13, partial [Stegodyphus mimosarum]
Unigene0008721	0.0368	9.0833	7.94737	1.61e-155	1.74e-154	--
Unigene0008799	0.001	120.464	16.8782	0	0	PREDICTED: acidic mammalian chitinase-like [Aplysia californica]
Unigene0008814	0.001	59.0543	15.8498	0	0	--
Unigene0008822	0.001	9.5021	13.214	1.48e-86	1.04e-85	Protein phosphatase 1 regulatory subunit 7 [Schistosoma japonicum]
Unigene0008825	0.001	17.7469	14.1153	1.08e-281	1.92e-280	--
Unigene0008844	0.001	9.3897	13.1969	3.26e-93	2.41e-92	--
Unigene0008856	0.2722	16.788	5.94662	0	0	PREDICTED: glycine receptor subunit alphaZ1-like [Acyrthosiphon pisum]
Unigene0008907	0.1142	11.8256	6.69421	2.37e-189	3.01e-188	PREDICTED: cation channel sperm-associated protein 3-like [Saccoglossus kowalevskii]
Unigene0008931	0.1361	2.8088	4.36721	1.65e-06	3.02e-06	--
Unigene0008944	0.1414	8.9452	5.98326	1.4e-113	1.18e-112	PREDICTED: LOW QUALITY PROTEIN: E3 ubiquitin-protein ligase RNF213-like [Amphimedon queenslandica]
Unigene0008948	0.001	270.56	18.0456	0	0	--
Unigene0008955	0.1582	9.9597	5.97628	1.03e-57	5.53e-57	--
Unigene0008966	0.001	2.8842	11.494	1.57e-08	3.21e-08	--
Unigene0008990	0.1524	2.1913	3.84585	0.000222778	0.000351847	Activating molecule in BECN1-regulated autophagy protein 1 [Zootermopsis nevadensis]
Unigene0009007	0.1137	0.9958	3.13062	0.000313464	0.000489328	PREDICTED: aspartate beta-hydroxylase domain-containing protein 2-like [Saccoglossus kowalevskii]
Unigene0009012	0.1216	1.0264	3.07738	0.000537698	0.000824613	Neurogenic locus notch-like protein 2, partial [Stegodyphus mimosarum]
Unigene0009028	0.001	3.6607	11.8379	1.57e-08	3.21e-08	--
Unigene0009029	0.001	3.164	11.6275	2.15e-09	4.6e-09	--
Unigene0009037	0.1713	16.065	6.55125	1.22e-170	1.42e-169	techylectin-5B isoform [Tachypleus tridentatus]
Unigene0009040	0.001	13.2807	13.697	8.64e-77	5.57e-76	--
Unigene0009045	0.0319	69.2147	11.0833	0	0	hypothetical protein BRAFLDRAFT_103544 [Branchiostoma floridae]
Unigene0009052	0.0665	20.5121	8.26891	2.75e-194	3.56e-193	cyclophilin B [Hyriopsis schlegelii]
Unigene0009096	0.001	12.8745	13.6522	1.22e-24	4.11e-24	--
Unigene0009121	0.0661	132.217	10.966	0	0	--
Unigene0009166	0.001	11.3491	13.4703	4.52e-138	4.4e-137	--
Unigene0009176	0.001	0.654	9.35315	0.00782344	0.0109487	--
Unigene0009182	0.001	8.2278	13.0063	6.6e-31	2.51e-30	Primary ciliary dyskinesia protein 1 [Schistosoma haematobium]
Unigene0009183	0.001	7.8322	12.9352	6.63e-48	3.2e-47	PREDICTED: primary ciliary dyskinesia protein 1-like [Saccoglossus kowalevskii]
Unigene0009184	0.1311	10.285	6.29373	4.73e-96	3.57e-95	PREDICTED: primary ciliary dyskinesia protein 1-like [Ciona intestinalis]
Unigene0009186	0.2638	9.5065	5.1714	6.76e-112	5.65e-111	serine protease 67 precursor [Nasonia vitripennis]
Unigene0009189	0.001	1.8742	10.8721	0.000122627	0.000197706	--
Unigene0009198	0.001	14.6099	13.8347	8.18e-118	7.11e-117	hypothetical protein T265_06512 [Opisthorchis viverrini]
Unigene0009199	0.1487	13.8692	6.54334	1.43e-169	1.65e-168	PREDICTED: prostatic acid phosphatase [Acromyrmex echinatior]
Unigene0009208	0.001	24.0238	14.5522	5.5e-146	5.61e-145	lectin BRA-3 [Megabalanus rosa]
Unigene0009217	0.001	0.676	9.40088	0.0156414	0.0212459	--
Unigene0009219	0.001	11.8315	13.5303	1.53e-109	1.25e-108	--
Unigene0009233	0.001	2.6816	11.3889	8.16e-07	1.52e-06	--
Unigene0009237	0.001	5.3166	12.3763	1.69e-23	5.58e-23	--
Unigene0009238	0.001	6.0841	12.5708	4.46e-56	2.36e-55	--
Unigene0009240	0.001	8.6772	13.083	1.85e-50	9.21e-50	REC8-like protein copy B [Daphnia pulex]
Unigene0009241	0.1275	11.2966	6.46925	1.22e-81	8.28e-81	--
Unigene0009264	0.001	18.1621	14.1486	2.37e-212	3.29e-211	alpha-carbonic anhydrase [Daphnia pulex]
Unigene0009271	0.001	127.915	16.9648	0	0	--
Unigene0009272	0.001	3.7517	11.8733	9.32e-34	3.73e-33	GI24584 [Drosophila mojavensis]
Unigene0009292	0.001	3.1541	11.623	1.04e-11	2.46e-11	--
Unigene0009301	0.0858	135.207	10.6219	0	0	CG42749, isoform B [Drosophila melanogaster]
Unigene0009308	0.1653	4.1342	4.64445	2.32e-07	4.47e-07	--
Unigene0009359	0.1949	15.7643	6.33778	3.46e-193	4.46e-192	PREDICTED: LOW QUALITY PROTEIN: ephexin-1-like [Diaphorina citri]
Unigene0009369	0.001	6.0712	12.5678	2.46e-16	6.8e-16	--
Unigene0009370	0.001	3.2845	11.6815	2.15e-09	4.6e-09	--
Unigene0009371	0.001	12.8257	13.6467	1.69e-25	5.81e-25	--
Unigene0009372	0.1192	22.8905	7.58522	1.78e-121	1.58e-120	--
Unigene0009374	0.0489	32.9075	9.39437	3.27e-214	4.57e-213	--
Unigene0009376	0.001	1.7458	10.7697	4.04e-05	6.76e-05	--
Unigene0009377	0.001	18.8413	14.2016	6.1e-64	3.49e-63	--
Unigene0009387	0.214	3.0779	3.84626	5.81e-08	1.16e-07	--
Unigene0009389	0.001	33.6558	15.0386	0	0	NEP-11, isoform a [Caenorhabditis elegans]
Unigene0009414	0.001	19.0541	14.2178	9.65e-231	1.44e-229	--
Unigene0009440	0.001	0.8391	9.7127	2.46e-14	6.4e-14	nervous system adducin [Aplysia californica]
Unigene0009470	0.001	2.6308	11.3613	1.11e-05	1.92e-05	--
Unigene0009473	0.001	2.6157	11.353	7.72e-11	1.76e-10	--
Unigene0009474	0.001	135.399	17.0469	0	0	--
Unigene0009503	0.001	0.8799	9.7812	0.000245094	0.000385742	PREDICTED: ATP-binding cassette sub-family A member 5 isoform X4 [Nasonia vitripennis]
Unigene0009543	0.001	9.2308	13.1722	1.49e-51	7.52e-51	--
Unigene0009545	0.001	8.4714	13.0484	3.18e-64	1.83e-63	--
Unigene0009548	0.001	2.5291	11.3044	5.78e-06	1.02e-05	--
Unigene0009549	0.001	9.1935	13.1664	6.45e-29	2.37e-28	--
Unigene0009550	0.001	12.1105	13.564	1.79e-73	1.12e-72	--
Unigene0009562	0.1722	4.6034	4.74054	5.4e-30	2.03e-29	--
Unigene0009563	0.0849	3.5577	5.38904	1.27e-13	3.24e-13	--
Unigene0009564	0.001	3.1124	11.6038	4.76e-16	1.3e-15	--
Unigene0009600	0.0389	85.2644	11.098	0	0	--
Unigene0009601	0.0957	5.872	5.93919	2.66e-145	2.71e-144	spore coat protein SP75 [Polysphondylium pallidum PN500]
Unigene0009602	0.2938	3.6748	3.64476	1.11e-06	2.05e-06	scavenger 5, partial [Daphnia arenata]
Unigene0009611	0.001	3.4814	11.7655	4.18e-09	8.81e-09	--
Unigene0009643	0.001	13.9629	13.7693	3.47e-33	1.37e-32	PREDICTED: calcium-activated chloride channel regulator 4A-like [Aplysia californica]
Unigene0009644	0.001	1.1523	10.1703	0.00391328	0.00561741	hypothetical protein DAPPUDRAFT_326977 [Daphnia pulex]
Unigene0009657	0.2371	1.1119	2.22946	4.13e-05	6.93e-05	--
Unigene0009721	0.1128	17.44	7.27249	6.35e-145	6.44e-144	AAEL007602-PA [Aedes aegypti]
Unigene0009778	0.001	12.322	13.5889	2.39e-138	2.33e-137	--
Unigene0009787	0.001	44.6977	15.4479	2.21e-289	4.03e-288	--
Unigene0009791	0.1868	6.1724	5.04627	2.58e-56	1.37e-55	PREDICTED: uncharacterized protein LOC100649456 [Bombus terrestris]
Unigene0009821	0.001	0.5128	9.00225	0.0312734	0.0412699	--
Unigene0009822	0.2352	2.7941	3.57042	1.47e-19	4.41e-19	--
Unigene0009825	0.2536	5.0214	4.30746	8.06e-32	3.12e-31	Protein mab-21 [Crassostrea gigas]
Unigene0009826	0.001	1.9725	10.9458	0.000276113	0.000432611	--
Unigene0009827	0.1842	3.7434	4.345	2.02e-11	4.74e-11	--
Unigene0009829	0.001	13.4123	13.7113	4.19e-209	5.74e-208	--
Unigene0009858	0.001	3.8035	11.8931	1.5e-10	3.38e-10	--
Unigene0009859	0.001	10.9044	13.4126	3.99e-229	5.88e-228	--
Unigene0009867	0.001	2.9453	11.5242	5.7e-10	1.25e-09	--
Unigene0009914	0.001	2.9582	11.5305	1.5e-10	3.38e-10	--
Unigene0009916	0.001	4.9506	12.2734	6.62e-15	1.75e-14	--
Unigene0009940	0.059	21.7679	8.52727	1.18e-232	1.78e-231	--
Unigene0009958	0.001	4.2094	12.0394	1.69e-23	5.58e-23	TPA_exp: polyprotein [Lytechinus variegatus]
Unigene0009959	0.1205	5.7643	5.58004	1.31e-56	6.97e-56	predicted protein [Nematostella vectensis]
Unigene0009961	0.001	7.6172	12.895	5.76e-53	2.95e-52	--
Unigene0009962	0.001	5.7103	12.4794	7.47e-39	3.22e-38	phage integrase family protein [Acanthamoeba castellanii str. Neff]
Unigene0009980	0.001	9.1965	13.1669	7.78e-43	3.52e-42	--
Unigene0009984	0.001	0.4881	8.93103	0.0312734	0.0412699	--
Unigene0010005	0.001	1003.42	19.9365	0	0	--
Unigene0010015	0.0962	3.2472	5.07702	1.37e-10	3.09e-10	--
Unigene0010033	0.1653	2.2738	3.78195	0.000404902	0.000627407	--
Unigene0010041	0.001	163.433	17.3183	0	0	PREDICTED: brain protein I3 [Nasonia vitripennis]
Unigene0010042	0.001	207.031	17.6595	0	0	--
Unigene0010047	0.001	1.2114	10.2425	6.14e-05	0.000101469	--
Unigene0010048	0.2142	7.6961	5.1671	7.5e-170	8.66e-169	--
Unigene0010067	0.0964	11.0384	6.83928	2.69e-209	3.7e-208	PREDICTED: LOW QUALITY PROTEIN: cilia- and flagella-associated protein 53 [Strongylocentrotus purpuratus]
Unigene0010106	0.1913	12.3534	6.01293	6.57e-78	4.3e-77	PREDICTED: phospholipase A2-like [Bombyx mori]
Unigene0010118	0.001	2.8683	11.486	3.01e-06	5.44e-06	--
Unigene0010119	0.001	5.0218	12.294	1.24e-12	3.06e-12	--
Unigene0010120	0.1478	8.6414	5.86955	3.19e-36	1.32e-35	--
Unigene0010122	0.001	9.4743	13.2098	8.56e-56	4.52e-55	--
Unigene0010147	0.0364	8.5624	7.87793	1.81e-148	1.87e-147	--
Unigene0010148	0.1117	66.6128	9.22003	0	0	--
Unigene0010149	0.001	9.1364	13.1574	4.5e-22	1.44e-21	--
Unigene0010202	0.001	0.4891	8.93399	0.0156414	0.0212459	--
Unigene0010204	0.001	18.9995	14.2137	1.55e-117	1.35e-116	--
Unigene0010222	0.001	30.1006	14.8775	0	0	--
Unigene0010231	0.001	9.2366	13.1731	6.69e-33	2.64e-32	--
Unigene0010233	0.001	2.8525	11.478	5.7e-10	1.25e-09	--
Unigene0010271	0.001	2.6499	11.3717	8.1e-09	1.68e-08	--
Unigene0010278	0.0676	8.9881	7.05485	3.31e-165	3.73e-164	--
Unigene0010279	0.001	39.1446	15.2565	2.13e-124	1.93e-123	--
Unigene0010280	0.001	79.4422	16.2776	0	0	predicted protein [Nematostella vectensis]
Unigene0010283	0.2734	10.7037	5.29095	2.64e-57	1.41e-56	--
Unigene0010289	0.001	39.1364	15.2562	0	0	--
Unigene0010291	0.001	5.2129	12.3479	6.62e-15	1.75e-14	--
Unigene0010302	0.001	11.8037	13.527	1.43e-96	1.08e-95	--
Unigene0010303	0.001	6.6397	12.6969	2.49e-32	9.72e-32	--
Unigene0010326	0.001	6.57	12.6817	1.75e-13	4.44e-13	--
Unigene0010327	0.001	10.6139	13.3737	8.66e-65	5.01e-64	--
Unigene0010330	0.001	1.0631	10.0541	6.14e-05	0.000101469	--
Unigene0010332	0.001	17.3292	14.0809	4.57e-204	6.14e-203	GI21147 [Drosophila mojavensis]
Unigene0010338	0.2522	4.2266	4.06686	7.48e-22	2.38e-21	PREDICTED: zinc finger protein 271-like [Acyrthosiphon pisum]
Unigene0010425	0.2477	4.1812	4.07725	8.57e-10	1.87e-09	BRCA1 protein [Dictyocaulus viviparus]
Unigene0010453	0.001	3.4689	11.7603	1.5e-10	3.38e-10	--
Unigene0010474	0.001	7.6517	12.9016	2.06e-41	9.17e-41	--
Unigene0010475	0.001	8.1744	12.9969	1.82e-148	1.89e-147	Protein mab-21 [Crassostrea gigas]
Unigene0010480	0.001	37.6582	15.2007	0	0	--
Unigene0010486	0.2217	1.1784	2.41015	0.0127622	0.0174982	PREDICTED: roundabout homolog 1 isoform X3 [Nasonia vitripennis]
Unigene0010492	0.001	1.3689	10.4188	4.04e-05	6.76e-05	--
Unigene0010493	0.0516	9.0249	7.4504	5.9e-110	4.87e-109	--
Unigene0010498	0.0689	24.2929	8.46182	2.68e-222	3.87e-221	--
Unigene0010523	0.001	4.0057	11.9678	1.24e-12	3.06e-12	PREDICTED: disintegrin and metalloproteinase domain-containing protein 10 [Microplitis demolitor]
Unigene0010524	0.001	6.9059	12.7536	6.56e-73	4.09e-72	PREDICTED: disintegrin and metalloproteinase domain-containing protein 10 isoform X4 [Megachile rotundata]
Unigene0010525	0.1332	8.1613	5.93713	1.86e-37	7.86e-37	PREDICTED: disintegrin and metalloproteinase domain-containing protein 10 isoform X3 [Vollenhovia emeryi]
Unigene0010526	0.001	9.3746	13.1945	3.77e-108	3.07e-107	PREDICTED: disintegrin and metalloproteinase domain-containing protein 10 isoform X4 [Megachile rotundata]
Unigene0010560	0.001	7.2144	12.8167	3.77e-37	1.59e-36	--
Unigene0010561	0.0489	9.7472	7.63901	1.4e-125	1.27e-124	conserved hypothetical protein [Culex quinquefasciatus]
Unigene0010603	0.001	1.0708	10.0645	1.57e-06	2.88e-06	--
Unigene0010607	0.001	6.5576	12.679	6.56e-59	3.57e-58	PREDICTED: uncharacterized protein LOC103573901 [Microplitis demolitor]
Unigene0010608	0.001	7.8093	12.931	9.74e-99	7.49e-98	--
Unigene0010610	0.1819	6.9966	5.26544	1.23e-22	3.97e-22	--
Unigene0010613	0.001	12.2399	13.5793	4.26e-54	2.21e-53	--
Unigene0010631	0.0504	31.8727	9.30468	0	0	DDDL1880 [Brugia malayi]
Unigene0010649	0.001	2.7994	11.4509	1.57e-08	3.21e-08	PREDICTED: macrophage mannose receptor 1-like [Aplysia californica]
Unigene0010650	0.001	2.6292	11.3604	3.04e-08	6.13e-08	--
Unigene0010653	0.001	22.4875	14.4568	0	0	PREDICTED: kelch-like protein 10 isoform X1 [Athalia rosae]
Unigene0010676	0.001	8.7989	13.1031	3.15e-55	1.65e-54	--
Unigene0010677	0.001	6.9897	12.771	5.7e-101	4.44e-100	PREDICTED: protein phosphatase 1 regulatory subunit 36 [Strongylocentrotus purpuratus]
Unigene0010679	0.0921	9.0791	6.6232	0	0	PREDICTED: dynein heavy chain 7, axonemal-like [Aplysia californica]
Unigene0010681	0.001	10.1121	13.3038	2.49e-32	9.72e-32	--
Unigene0010738	0.001	15.8231	13.9497	1.48e-128	1.37e-127	PREDICTED: LOW QUALITY PROTEIN: intraflagellar transport protein 43 homolog A [Strongylocentrotus purpuratus]
Unigene0010742	0.2787	8.9469	5.0046	1.73e-158	1.89e-157	hypothetical protein BRAFLDRAFT_134106 [Branchiostoma floridae]
Unigene0010749	0.001	121.42	16.8896	0	0	PREDICTED: blastula protease 10-like [Aplysia californica]
Unigene0010759	0.001	1.5508	10.5988	0.000489894	0.000754178	--
Unigene0010760	0.0586	27.7084	8.88521	0	0	PREDICTED: beta-1,3-galactosyltransferase 5 [Ceratitis capitata]
Unigene0010764	0.2546	9.961	5.28999	1.22e-154	1.31e-153	LRRC48-like protein [Saccoglossus kowalevskii]
Unigene0010777	0.001	6.7464	12.7199	1.74e-29	6.48e-29	--
Unigene0010778	0.001	10.0953	13.3014	3.64e-75	2.32e-74	hypothetical protein BRAFLDRAFT_86005 [Branchiostoma floridae]
Unigene0010801	0.0527	38.9754	9.53055	0	0	--
Unigene0010833	0.2722	3.2344	3.57076	3.53e-06	6.33e-06	--
Unigene0010843	0.001	11.1324	13.4425	2.36e-24	7.9e-24	--
Unigene0010864	0.001	206.299	17.6544	0	0	predicted protein [Nematostella vectensis]
Unigene0010865	0.001	103.891	16.6647	0	0	--
Unigene0010876	0.001	2.8614	11.4825	2.93e-10	6.49e-10	--
Unigene0010877	0.001	3.157	11.6243	6.48e-13	1.61e-12	--
Unigene0010903	0.2553	56.4017	7.7874	1.8e-272	3.12e-271	GH21613 [Drosophila grimshawi]
Unigene0010956	0.001	9.3299	13.1876	3.6e-127	3.3e-126	--
Unigene0010962	0.001	7.6587	12.9029	6.1e-64	3.49e-63	--
Unigene0010963	0.001	6.9496	12.7627	5.76e-69	3.47e-68	--
Unigene0010973	0.001	57.281	15.8058	0	0	PREDICTED: Sjoegren syndrome nuclear autoantigen 1 homolog [Solenopsis invicta]
Unigene0011022	0.001	3.7613	11.877	2.39e-12	5.79e-12	--
Unigene0011029	0.001	10.5172	13.3605	2.89e-219	4.13e-218	predicted protein [Nematostella vectensis]
Unigene0011040	0.001	6.6008	12.6884	1.24e-28	4.54e-28	--
Unigene0011041	0.208	4.4872	4.43116	3.28e-12	7.91e-12	reverse transcriptase [Ancylostoma duodenale]
Unigene0011043	0.001	5.681	12.4719	2.02e-39	8.76e-39	--
Unigene0011054	0.001	2.6517	11.3727	5.78e-06	1.02e-05	--
Unigene0011055	0.1281	3.8452	4.90772	1.5e-17	4.29e-17	--
Unigene0011083	0.0235	13.885	9.20665	0	0	--
Unigene0011090	0.001	2.3355	11.1895	4.04e-05	6.76e-05	--
Unigene0011128	0.295	16.4181	5.79843	2.63e-194	3.41e-193	PREDICTED: nucleolar protein 4-like isoform X2 [Athalia rosae]
Unigene0011147	0.1732	9.031	5.70437	9.51e-78	6.21e-77	PREDICTED: cysteine sulfinic acid decarboxylase-like [Musca domestica]
Unigene0011171	0.275	7.6742	4.80251	1.22e-61	6.84e-61	PREDICTED: cilia- and flagella-associated protein 74-like, partial [Hydra vulgaris]
Unigene0011178	0.001	13.9082	13.7636	0	0	--
Unigene0011183	0.0673	9.2522	7.10305	2.58e-87	1.82e-86	--
Unigene0011224	0.0371	9.5575	8.00907	7.34e-83	5.01e-82	--
Unigene0011231	0.001	195.336	17.5756	0	0	cleavage stage histone H1 [Psammechinus miliaris]
Unigene0011236	0.001	31.7975	14.9566	0	0	PREDICTED: glycine receptor subunit alphaZ1-like [Crassostrea gigas]
Unigene0011246	0.0721	225.315	11.6097	0	0	hypothetical protein BRAFLDRAFT_121421 [Branchiostoma floridae]
Unigene0011248	0.001	632.85	19.2715	0	0	fructose 1,6-biphosphate-aldolase A [Fenneropenaeus chinensis]
Unigene0011255	0.001	6.6147	12.6915	3.32e-19	9.9e-19	--
Unigene0011256	0.001	8.8465	13.1109	3.35e-106	2.7e-105	PREDICTED: coiled-coil domain-containing protein 42 homolog isoform X2 [Crassostrea gigas]
Unigene0011257	0.1487	9.1467	5.94277	1.44e-145	1.47e-144	PREDICTED: coiled-coil domain-containing protein 42 homolog [Strongylocentrotus purpuratus]
Unigene0011270	0.001	0.5066	8.9847	0.00782344	0.0109487	--
Unigene0011295	0.001	9.6368	13.2343	3.01e-69	1.82e-68	--
Unigene0011299	0.098	16.5087	7.39623	5.04e-258	8.29e-257	PREDICTED: intraflagellar transport protein 52 homolog [Aplysia californica]
Unigene0011305	0.237	30.7821	7.02106	6.1595407267878e-313	1.20312676445339e-311	cathepsin L [Triatoma brasiliensis]
Unigene0011309	0.001	14.524	13.8262	1.31e-49	6.48e-49	--
Unigene0011310	0.001	12.2004	13.5746	9.33e-36	3.85e-35	--
Unigene0011311	0.0758	21.9666	8.1789	2.52e-183	3.11e-182	--
Unigene0011315	0.2794	3.4072	3.60818	1.98e-06	3.6e-06	--
Unigene0011342	0.2932	39.1794	7.06207	6.29e-284	1.13e-282	--
Unigene0011349	0.001	72.2058	16.1398	0	0	PREDICTED: blastula protease 10 [Strongylocentrotus purpuratus]
Unigene0011355	0.001	9.7366	13.2492	2.38e-28	8.66e-28	--
Unigene0011391	0.001	3.6219	11.8225	1.29e-32	5.06e-32	PREDICTED: dynein heavy chain 8, axonemal-like [Strongylocentrotus purpuratus]
Unigene0011402	0.001	12.7152	13.6343	3.81e-144	3.84e-143	--
Unigene0011404	0.0816	1461.6	14.1286	0	0	nucleoplasmin isoform 1-like protein [Maconellicoccus hirsutus]
Unigene0011413	0.001	3.3137	11.6942	2.46e-16	6.8e-16	--
Unigene0011414	0.1459	9.3746	6.00571	2.3e-77	1.49e-76	--
Unigene0011425	0.1286	6.7525	5.71446	1.44e-16	3.99e-16	--
Unigene0011427	0.001	10.6488	13.3784	3.35e-106	2.7e-105	--
Unigene0011428	0.0918	9.6393	6.71429	1.71e-191	2.2e-190	--
Unigene0011470	0.001	1.1057	10.1107	0.000245094	0.000385742	--
Unigene0011477	0.001	10.399	13.3442	2.83e-40	1.24e-39	--
Unigene0011479	0.001	10.6155	13.3739	7.2e-144	7.23e-143	--
Unigene0011501	0.0784	189.013	11.2353	0	0	--
Unigene0011504	0.001	64.2266	15.9709	0	0	--
Unigene0011508	0.2925	1.3167	2.17042	0.000477614	0.000737389	PREDICTED: nose resistant to fluoxetine protein 6-like [Crassostrea gigas]
Unigene0011524	0.1889	8.4652	5.48585	8.15e-79	5.38e-78	PREDICTED: TBC1 domain family member 31-like [Aplysia californica]
Unigene0011525	0.001	6.3378	12.6298	2.34e-26	8.17e-26	--
Unigene0011543	0.001	0.9646	9.91379	0.00782344	0.0109487	--
Unigene0011602	0.0335	19.237	9.16551	1.02e-183	1.26e-182	hypothetical protein TcasGA2_TC013968 [Tribolium castaneum]
Unigene0011659	0.0438	24.2474	9.11268	2.86e-177	3.42e-176	--
Unigene0011663	0.001	2.2952	11.1644	4.04e-05	6.76e-05	--
Unigene0011666	0.001	0.5893	9.20286	0.0312734	0.0412699	--
Unigene0011667	0.001	0.9194	9.84455	0.00391328	0.00561741	--
Unigene0011669	0.2583	8.5606	5.05059	5.22e-29	1.93e-28	--
Unigene0011673	0.001	13.6674	13.7385	2.37e-212	3.29e-211	PREDICTED: poly [ADP-ribose] polymerase 12-like, partial [Saccoglossus kowalevskii]
Unigene0011682	0.001	15.2789	13.8993	1.27e-179	1.54e-178	--
Unigene0011685	0.1991	4.8958	4.61998	9.86e-21	3.06e-20	PREDICTED: nuclear speckle splicing regulatory protein 1-like [Ceratosolen solmsi marchali]
Unigene0011692	0.001	4.637	12.179	3.35e-29	1.24e-28	--
Unigene0011693	0.001	4.0334	11.9778	4.79e-32	1.86e-31	--
Unigene0011695	0.001	9.1988	13.1672	1.35e-152	1.42e-151	--
Unigene0011698	0.2127	11.6271	5.77253	0	0	--
Unigene0011719	0.1845	11.6853	5.98493	3.61e-186	4.52e-185	AAEL000683-PA [Aedes aegypti]
Unigene0011731	0.2587	10.2815	5.31263	4.96e-102	3.9e-101	--
Unigene0011741	0.001	553.52	19.0783	0	0	--
Unigene0011774	0.001	2.3346	11.189	3.04e-08	6.13e-08	PREDICTED: alpha-L-fucosidase-like [Ciona intestinalis]
Unigene0011775	0.1382	3.1099	4.49204	1.43e-06	2.63e-06	--
Unigene0011791	0.001	4.8447	12.2422	2.36e-24	7.9e-24	--
Unigene0011794	0.025	78.821	11.6224	0	0	--
Unigene0011795	0.001	8.5991	13.07	2.33e-20	7.16e-20	--
Unigene0011804	0.001	6.7054	12.7111	4.38e-20	1.34e-19	--
Unigene0011805	0.001	16.6013	14.019	5.64e-91	4.1e-90	PREDICTED: uncharacterized protein K02A2.6-like [Crassostrea gigas]
Unigene0011809	0.0614	10.4047	7.40478	1.97e-210	2.72e-209	PREDICTED: Krueppel homolog 1-like [Diaphorina citri]
Unigene0011818	0.001	1.4591	10.5109	0.000489894	0.000754178	--
Unigene0011826	0.0331	2.3565	6.15367	1.53e-22	4.93e-22	G-protein coupled receptor Mth2, partial [Stegodyphus mimosarum]
Unigene0011827	0.2204	11.2863	5.6783	7.63e-149	7.92e-148	G-protein coupled receptor Mth2 [Zootermopsis nevadensis]
Unigene0011856	0.1249	101.082	9.66054	0	0	PREDICTED: probable chitinase 3-like [Metaseiulus occidentalis]
Unigene0011872	0.2654	2.5724	3.27687	6.02e-05	9.98e-05	--
Unigene0011880	0.0531	160.069	11.5577	0	0	GE17972 [Drosophila yakuba]
Unigene0011941	0.0208	11.6505	9.12959	0	0	--
Unigene0011956	0.175	9.6424	5.78397	6.06e-145	6.14e-144	PREDICTED: hyaluronidase-like [Bombus terrestris]
Unigene0011967	0.001	11.9825	13.5486	1.26e-132	1.19e-131	--
Unigene0011971	0.001	4.8376	12.2401	4.58e-12	1.1e-11	--
Unigene0011973	0.001	2.4967	11.2858	2.2e-07	4.23e-07	--
Unigene0011977	0.0554	167.865	11.5651	0	0	--
Unigene0012046	0.2603	5.4929	4.39932	7.34e-23	2.39e-22	--
Unigene0012049	0.0718	6.8647	6.57907	1.89e-30	7.16e-30	--
Unigene0012050	0.001	8.6655	13.0811	8.03e-110	6.62e-109	PREDICTED: protein asteroid [Solenopsis invicta]
Unigene0012051	0.001	9.4575	13.2072	1.39e-129	1.3e-128	PREDICTED: LOW QUALITY PROTEIN: eukaryotic translation initiation factor 4 gamma 3 [Saccoglossus kowalevskii]
Unigene0012052	0.001	20.1096	14.2956	6.97e-75	4.43e-74	--
Unigene0012161	0.001	12.805	13.6444	6.49e-78	4.25e-77	PREDICTED: uncharacterized F-box/LRR-repeat protein C02F5.7 isoform X3 [Harpegnathos saltator]
Unigene0012176	0.001	34.9599	15.0934	1.31e-168	1.5e-167	AGAP009875-PA [Anopheles gambiae str. PEST]
Unigene0012214	0.001	10.2443	13.3225	6.01e-209	8.23e-208	--
Unigene0012215	0.001	8.8736	13.1153	8.27e-185	1.03e-183	PREDICTED: nose resistant to fluoxetine protein 6-like [Crassostrea gigas]
Unigene0012239	0.001	13.617	13.7331	1.98e-108	1.62e-107	--
Unigene0012240	0.001	2.2756	11.152	4.04e-05	6.76e-05	--
Unigene0012241	0.001	1.453	10.5048	0.000489894	0.000754178	--
Unigene0012245	0.0369	18.8603	8.99752	1.63041663127611e-319	3.2481011908589e-318	--
Unigene0012256	0.001	33.5404	15.0336	0	0	PREDICTED: transcription factor NAI1-like [Crassostrea gigas]
Unigene0012284	0.001	59.3224	15.8563	0	0	--
Unigene0012286	0.1714	4.0729	4.57062	8.31e-14	2.13e-13	--
Unigene0012298	0.0705	3.6126	5.67927	5.36e-31	2.05e-30	--
Unigene0012330	0.001	52.6027	15.6828	0	0	protein FAM154A [Clonorchis sinensis]
Unigene0012333	0.1291	12.0923	6.54946	2.39e-143	2.39e-142	E3 ubiquitin-protein ligase RFWD3, partial [Stegodyphus mimosarum]
Unigene0012341	0.0155	40.2769	11.3435	0	0	PREDICTED: G2/mitotic-specific cyclin-B-like [Saccoglossus kowalevskii]
Unigene0012368	0.001	0.6711	9.39038	0.00782344	0.0109487	--
Unigene0012440	0.1299	4.6303	5.15563	3.89e-11	8.98e-11	--
Unigene0012452	0.0796	12.4381	7.28778	7.98e-147	8.19e-146	--
Unigene0012473	0.001	3.5377	11.7886	1.24e-28	4.54e-28	--
Unigene0012474	0.001	3.8586	11.9139	2.02e-39	8.76e-39	--
Unigene0012475	0.001	10.9537	13.4191	2.39e-138	2.33e-137	PREDICTED: tetratricopeptide repeat protein 25 [Ciona intestinalis]
Unigene0012476	0.0587	10.3466	7.46158	2.51e-111	2.09e-110	--
Unigene0012522	0.001	3.7451	11.8708	7.17e-13	1.78e-12	--
Unigene0012530	0.001	73.1932	16.1594	0	0	--
Unigene0012547	0.2343	293.532	10.2909	0	0	cathepsin D [Clonorchis sinensis]
Unigene0012548	0.001	19.0382	14.2166	2.56e-228	3.77e-227	--
Unigene0012550	0.001	1.5658	10.6127	0.000489894	0.000754178	--
Unigene0012552	0.001	4.9895	12.2847	4.06e-52	2.06e-51	PREDICTED: probable 3',5'-cyclic phosphodiesterase pde-5 isoform X10 [Crassostrea gigas]
Unigene0012567	0.001	12.4989	13.6095	0	0	--
Unigene0012568	0.001	0.6365	9.31402	0.0156414	0.0212459	--
Unigene0012570	0.2536	7.5661	4.89892	2.61e-58	1.41e-57	PREDICTED: serine/threonine-protein kinase PLK4 [Athalia rosae]
Unigene0012571	0.001	2.8329	11.4681	1.57e-06	2.88e-06	Serine/threonine-protein kinase PLK4 [Zootermopsis nevadensis]
Unigene0012669	0.001	7.2602	12.8258	2.45e-30	9.23e-30	DNA polymerase alpha [Plasmodium knowlesi strain H]
Unigene0012670	0.1259	7.7959	5.95237	5.25e-38	2.24e-37	DNA polymerase alpha [Plasmodium knowlesi strain H]
Unigene0012674	0.0671	12.2789	7.51565	0	0	PREDICTED: adenylate kinase 7-like [Crassostrea gigas]
Unigene0012678	0.2554	17.896	6.13073	0	0	--
Unigene0012679	0.001	13.6927	13.7411	0	0	PREDICTED: WD repeat-containing protein 66-like [Saccoglossus kowalevskii]
Unigene0012694	0.102	28.3175	8.11698	3.04e-89	2.18e-88	--
Unigene0012696	0.0317	35.5795	10.1323	0	0	--
Unigene0012724	0.1588	62.0902	8.61101	0	0	--
Unigene0012729	0.001	1.1349	10.1483	0.00782344	0.0109487	--
Unigene0012731	0.001	4.383	12.0977	8.1e-09	1.68e-08	--
Unigene0012769	0.001	3.7146	11.859	5.7e-10	1.25e-09	PREDICTED: LOW QUALITY PROTEIN: dynein heavy chain 1, axonemal [Strongylocentrotus purpuratus]
Unigene0012770	0.001	11.8614	13.534	2.24e-209	3.08e-208	PREDICTED: protein FAM92A1-like isoform X1 [Saccoglossus kowalevskii]
Unigene0012778	0.001	0.6645	9.37613	2.93e-10	6.49e-10	Equilibrative nucleoside transporter 3 [Zootermopsis nevadensis]
Unigene0012806	0.001	3.0931	11.5948	2.2e-07	4.23e-07	--
Unigene0012810	0.001	15.9592	13.9621	6.81e-213	9.5e-212	--
Unigene0012811	0.001	45.8097	15.4834	0	0	--
Unigene0012814	0.1651	22.9191	7.11707	3.32e-172	3.88e-171	hypothetical protein DAPPUDRAFT_314112 [Daphnia pulex]
Unigene0012817	0.001	11.2592	13.4588	7.77e-52	3.94e-51	PREDICTED: mucin-2-like [Aplysia californica]
Unigene0012818	0.059	50.6749	9.74634	0	0	Zinc finger protein 235, partial [Stegodyphus mimosarum]
Unigene0012831	0.0174	66.0235	11.8897	0	0	PREDICTED: microtubule-associated protein futsch-like isoform X1 [Microplitis demolitor]
Unigene0012858	0.1355	1014.72	12.8705	0	0	cathepsin L-like proteinase precursor [Tribolium castaneum]
Unigene0012861	0.1755	1.7007	3.27659	6.02e-05	9.98e-05	PREDICTED: probable cation-transporting ATPase 13A3 [Ceratosolen solmsi marchali]
Unigene0012904	0.001	3.976	11.9571	1.76e-17	5.01e-17	--
Unigene0012905	0.001	12.1704	13.5711	1.57e-178	1.89e-177	Actin1 [Acanthamoeba castellanii str. Neff]
Unigene0012906	0.001	16.3274	13.995	2.75e-81	1.85e-80	hypothetical protein TRIADDRAFT_53152 [Trichoplax adhaerens]
Unigene0012907	0.0858	9.282	6.75731	6.76e-68	4.02e-67	PREDICTED: adenylate kinase 8-like isoform X2 [Crassostrea gigas]
Unigene0012908	0.001	10.1407	13.3079	4.83e-34	1.94e-33	adenylate kinase domain protein [Tetrahymena thermophila SB210]
Unigene0012913	0.001	14.106	13.784	1.73e-282	3.08e-281	--
Unigene0012914	0.001	9.4063	13.1994	1.26e-121	1.12e-120	--
Unigene0012932	0.001	47.835	15.5458	0	0	PREDICTED: thiamine-triphosphatase-like isoform X1 [Saccoglossus kowalevskii]
Unigene0012934	0.001	34.9022	15.091	0	0	hypothetical protein LOTGIDRAFT_124993, partial [Lottia gigantea]
Unigene0012944	0.0445	37.6437	9.72439	0	0	hypothetical protein BRAFLDRAFT_131679 [Branchiostoma floridae]
Unigene0012945	0.001	18.0954	14.1433	1.09e-43	4.97e-43	--
Unigene0012946	0.001	17.746	14.1152	1.39e-36	5.8e-36	--
Unigene0012947	0.001	17.107	14.0623	4.79e-32	1.86e-31	--
Unigene0012948	0.001	1.8439	10.8485	6.14e-05	0.000101469	--
Unigene0012949	0.001	1.9464	10.9266	0.000276113	0.000432611	cuticular protein analogous to peritrophins 1-F precursor [Tribolium castaneum]
Unigene0012968	0.001	33.4658	15.0304	0	0	--
Unigene0012986	0.001	70.0454	16.096	0	0	hypothetical protein [Paramecium tetraurelia strain d4-2]
Unigene0013011	0.001	2.9387	11.521	2.15e-09	4.6e-09	--
Unigene0013030	0.001	46.2762	15.498	0	0	--
Unigene0013062	0.001	9.8943	13.2724	3.59e-95	2.69e-94	--
Unigene0013063	0.001	96.1515	16.553	0	0	--
Unigene0013069	0.001	0.9335	9.86651	0.000489894	0.000754178	--
Unigene0013074	0.001	52.902	15.691	0	0	--
Unigene0013146	0.2568	13.8083	5.74875	1.52127753010978e-319	3.03230813872482e-318	hypothetical protein CAEBREN_15845 [Caenorhabditis brenneri]
Unigene0013163	0.001	33.3121	15.0238	0	0	--
Unigene0013170	0.001	2.5356	11.3081	4.04e-05	6.76e-05	--
Unigene0013171	0.001	2.3487	11.1976	0.000145836	0.000233094	--
Unigene0013181	0.1047	11.3269	6.75735	5.05e-166	5.71e-165	PREDICTED: LRP2-binding protein-like [Ciona intestinalis]
Unigene0013213	0.2798	4.7236	4.07742	2.32e-13	5.84e-13	--
Unigene0013231	0.0498	43.6543	9.77576	1.12e-276	1.96e-275	RecName: Full=Lectin BRA-3; Flags: Precursor [Megabalanus rosa]
Unigene0013233	0.1052	11.214	6.73602	1.62e-66	9.52e-66	RecName: Full=Lectin BRA-3; Flags: Precursor [Megabalanus rosa]
Unigene0013234	0.2074	94.0973	8.82559	0	0	PREDICTED: FRAS1-related extracellular matrix protein 1 [Ciona intestinalis]
Unigene0013243	0.001	1.8198	10.8296	6.14e-05	0.000101469	--
Unigene0013245	0.001	7.4682	12.8665	3.43e-15	9.17e-15	--
Unigene0013246	0.0699	13.7291	7.61773	9.09e-125	8.25e-124	PREDICTED: venom allergen 3-like [Vollenhovia emeryi]
Unigene0013251	0.001	6.4235	12.6491	2.28e-20	7e-20	--
Unigene0013255	0.2289	12.023	5.71494	3.58e-123	3.21e-122	PREDICTED: IQ domain-containing protein D-like [Hydra vulgaris]
Unigene0013261	0.001	14.7853	13.8519	2.59e-115	2.22e-114	--
Unigene0013262	0.001	17.2375	14.0733	1.93e-180	2.35e-179	--
Unigene0013305	0.001	20.3678	14.314	1.03e-240	1.59e-239	PREDICTED: spermatogenesis-associated protein 17-like [Saccoglossus kowalevskii]
Unigene0013311	0.001	4.0813	11.9948	2.36e-24	7.9e-24	C9orf68 homolog [Caligus clemensi]
Unigene0013312	0.2385	10.3827	5.44405	2.07e-100	1.61e-99	--
Unigene0013315	0.0907	19.1794	7.72424	4.27e-68	2.54e-67	--
Unigene0013316	0.1668	9.49	5.83022	3.13e-18	9.1e-18	--
Unigene0013318	0.001	6.5233	12.6714	8.67e-22	2.75e-21	--
Unigene0013319	0.001	18.7075	14.1913	1.16e-54	6.04e-54	--
Unigene0013380	0.056	57.8173	10.0119	0	0	--
Unigene0013399	0.001	3.0317	11.5659	2.2e-07	4.23e-07	--
Unigene0013452	0.2932	8.3839	4.83766	1.03e-86	7.24e-86	PREDICTED: MFS-type transporter SLC18B1-like [Tribolium castaneum]
Unigene0013454	0.1844	13.5127	6.19533	5.41e-111	4.5e-110	--
Unigene0013455	0.0439	12.9351	8.20285	1.44e-186	1.8e-185	--
Unigene0013462	0.001	31.5254	14.9442	0	0	--
Unigene0013531	0.1532	67.4672	8.78263	0	0	--
Unigene0013541	0.001	0.5995	9.22762	0.00097925	0.00147092	PREDICTED: transportin-3 [Ceratosolen solmsi marchali]
Unigene0013562	0.1738	2.2282	3.68038	6.17e-07	1.16e-06	--
Unigene0013587	0.001	9.9527	13.2809	1.57e-178	1.89e-177	PREDICTED: probable tubulin polyglutamylase TTLL9 [Amphimedon queenslandica]
Unigene0013604	0.001	4.5601	12.1548	4.74e-14	1.22e-13	--
Unigene0013622	0.2595	5.5354	4.41488	7.01e-51	3.51e-50	PREDICTED: sialin [Cerapachys biroi]
Unigene0013632	0.1524	10.4541	6.10006	2.22e-221	3.21e-220	--
Unigene0013645	0.0727	28.1409	8.5965	0	0	Arylsulfatase B, partial [Stegodyphus mimosarum]
Unigene0013676	0.1333	468.698	11.7798	0	0	alpha tubulin [Glossina morsitans morsitans]
Unigene0013696	0.001	3.3553	11.7122	4.18e-09	8.81e-09	--
Unigene0013697	0.2146	815.853	11.8924	0	0	--
Unigene0013698	0.2167	174.933	9.65689	0	0	--
Unigene0013702	0.001	1.3267	10.3736	0.000145836	0.000233094	--
Unigene0013704	0.1738	2.7173	3.96667	6.66e-05	0.000109855	PREDICTED: venom protease isoform X2 [Megachile rotundata]
Unigene0013705	0.001	0.8904	9.79831	0.0156414	0.0212459	--
Unigene0013708	0.1993	15.5485	6.28569	3.11e-95	2.33e-94	PREDICTED: RNA-directed DNA polymerase from mobile element jockey-like [Athalia rosae]
Unigene0013710	0.0627	12.4677	7.63551	2.63e-125	2.39e-124	AAEL004979-PA [Aedes aegypti]
Unigene0013713	0.001	4.9132	12.2624	2.46e-14	6.4e-14	--
Unigene0013754	0.001	0.9008	9.81506	0.00782344	0.0109487	--
Unigene0013762	0.0381	5.2465	7.10542	2.58e-87	1.82e-86	Vitamin D3 receptor B, partial [Stegodyphus mimosarum]
Unigene0013763	0.0781	3.1992	5.35624	1.55e-24	5.21e-24	--
Unigene0013794	0.1435	4.3072	4.90763	3.12e-09	6.64e-09	--
Unigene0013818	0.001	0.7142	9.48018	0.00195752	0.00287421	--
Unigene0013821	0.272	11.9725	5.45997	7.1e-188	8.97e-187	neurogenic locus Notch protein [Clonorchis sinensis]
Unigene0013835	0.001	1.7309	10.7573	0.000245094	0.000385742	--
Unigene0013836	0.0691	55.41	9.64724	0	0	PREDICTED: dual oxidase maturation factor 1 [Tribolium castaneum]
Unigene0013837	0.0278	11.3842	8.67773	1.98e-257	3.25e-256	--
Unigene0013861	0.001	2.6677	11.3814	3.01e-06	5.44e-06	--
Unigene0013862	0.001	12.7555	13.6388	4.57e-186	5.72e-185	polyprotein [Azumapecten farreri]
Unigene0013863	0.0674	12.7417	7.56259	1.29e-177	1.55e-176	polyprotein [Mizuhopecten yessoensis]
Unigene0013879	0.001	13.8251	13.755	8.31e-237	1.26e-235	PREDICTED: thrombospondin-2-like isoform X1 [Fopius arisanus]
Unigene0013908	0.2881	3.6033	3.64468	1.11e-06	2.05e-06	--
Unigene0013909	0.2575	29.1566	6.82311	0	0	PREDICTED: protein FAM183B-like [Saccoglossus kowalevskii]
Unigene0013923	0.001	3.3798	11.7227	9.08e-18	2.6e-17	--
Unigene0013933	0.1313	42.0502	8.3231	0	0	--
Unigene0013937	0.0829	13.2649	7.32203	9.89e-246	1.56e-244	GYG-1, isoform a [Caenorhabditis elegans]
Unigene0013945	0.0491	7.5944	7.27307	1.47e-97	1.12e-96	PREDICTED: venom serine carboxypeptidase [Microplitis demolitor]
Unigene0013953	0.0508	14.0338	8.10986	0	0	PREDICTED: hyaluronidase-like [Nasonia vitripennis]
Unigene0013961	0.274	211.028	9.58905	0	0	hypothetical protein CAPTEDRAFT_186758, partial [Capitella teleta]
Unigene0014005	0.001	5.4539	12.4131	2.03e-11	4.75e-11	GF22964 [Drosophila ananassae]
Unigene0014032	0.001	4.2249	12.0447	1.78e-31	6.85e-31	PREDICTED: peptidyl-prolyl cis-trans isomerase-like 3 [Bombus terrestris]
Unigene0014046	0.0871	24.3907	8.12944	0	0	thymus-specific serine protease [Culex quinquefasciatus]
Unigene0014053	0.1175	0.5512	2.22992	0.0352229	0.0462678	--
Unigene0014073	0.001	0.6992	9.44956	0.0156414	0.0212459	PREDICTED: syntaxin-8-like [Aplysia californica]
Unigene0014086	0.1698	1.9116	3.49287	0.0023592	0.00344635	--
Unigene0014088	0.001	21.3168	14.3797	0	0	PREDICTED: MORN repeat-containing protein 5-like [Saccoglossus kowalevskii]
Unigene0014095	0.001	6.7473	12.7201	1.23e-45	5.76e-45	--
Unigene0014119	0.001	12.0203	13.5532	2.25e-70	1.37e-69	--
Unigene0014120	0.2505	13.4895	5.75088	4.65e-247	7.4e-246	PREDICTED: dynein intermediate chain 3, ciliary-like [Saccoglossus kowalevskii]
Unigene0014132	0.1776	295.306	10.6994	0	0	--
Unigene0014133	0.1493	1112.28	12.863	0	0	DNA-directed RNA polymerase II largest subunit [Theileria parva strain Muguga]
Unigene0014180	0.1806	5.8726	5.02313	4.81e-10	1.06e-09	--
Unigene0014182	0.2836	11.2464	5.30946	3.5e-80	2.34e-79	PREDICTED: collagen type IV alpha-3-binding protein [Microplitis demolitor]
Unigene0014184	0.001	10.4443	13.3504	4.08e-87	2.87e-86	--
Unigene0014185	0.1839	9.5059	5.69183	9.95e-92	7.27e-91	--
Unigene0014201	0.001	3.3783	11.7221	1.14e-07	2.23e-07	--
Unigene0014202	0.001	2.3818	11.2178	1.11e-05	1.92e-05	--
Unigene0014203	0.001	0.6092	9.25077	0.0156414	0.0212459	--
Unigene0014213	0.001	48.6417	15.5699	0	0	--
Unigene0014223	0.001	2.4525	11.26	1.11e-05	1.92e-05	--
Unigene0014226	0.001	8.6458	13.0778	4.53e-20	1.38e-19	--
Unigene0014246	0.001	2.1457	11.0672	0.000276113	0.000432611	--
Unigene0014252	0.0746	86.0627	10.172	0	0	hypothetical protein NEMVEDRAFT_v1g149561 [Nematostella vectensis]
Unigene0014276	0.001	6.3959	12.6429	1.67e-44	7.72e-44	--
Unigene0014277	0.001	15.6788	13.9365	7.3e-208	9.93e-207	GL21605 [Drosophila persimilis]
Unigene0014285	0.2086	35.7758	7.4221	0	0	PREDICTED: kelch-like protein 10 [Athalia rosae]
Unigene0014317	0.001	2.2003	11.1035	4.04e-05	6.76e-05	PREDICTED: echinoderm microtubule-associated protein-like CG42247 [Musca domestica]
Unigene0014331	0.001	0.3761	8.55497	0.0156414	0.0212459	--
Unigene0014333	0.001	0.7255	9.50283	0.00391328	0.00561741	--
Unigene0014361	0.001	304.095	18.2142	0	0	--
Unigene0014403	0.0997	9.0137	6.49838	2.03e-137	1.97e-136	AAEL005988-PA [Aedes aegypti]
Unigene0014463	0.119	57.116	8.90679	0	0	astacin [Ancylostoma ceylanicum]
Unigene0014474	0.001	2.8362	11.4697	5.7e-10	1.25e-09	PREDICTED: uncharacterized protein LOC105663737 [Megachile rotundata]
Unigene0014507	0.001	31.927	14.9625	0	0	--
Unigene0014597	0.001	134.521	17.0375	0	0	glyceraldehyde 3-phosphate dehydrogenase [Homalodisca vitripennis]
Unigene0014625	0.001	5.1336	12.3258	1.04e-11	2.46e-11	--
Unigene0014626	0.1609	10.3183	6.0029	2.55e-133	2.42e-132	PREDICTED: meiosis-specific with OB domain-containing protein [Strongylocentrotus purpuratus]
Unigene0014686	0.1631	2.4477	3.9076	0.000122056	0.000197267	--
Unigene0014734	0.001	3.5925	11.8108	3.04e-08	6.13e-08	--
Unigene0014735	0.001	1.2492	10.2868	0.000489894	0.000754178	--
Unigene0014758	0.001	7.0872	12.791	2.06e-41	9.17e-41	--
Unigene0014809	0.001	133.16	17.0228	0	0	alpha-carbonic anhydrase [Daphnia pulex]
Unigene0014812	0.059	64.4346	10.0929	0	0	--
Unigene0014813	0.2789	42.7713	7.26075	0	0	NAS-6, isoform a [Caenorhabditis elegans]
Unigene0014814	0.1744	35.7266	7.67845	2.32e-192	2.99e-191	hexokinase [Gregarina niphandrodes]
Unigene0014833	0.001	4.2768	12.0623	1.07e-41	4.78e-41	--
Unigene0014834	0.001	3.2533	11.6677	3.32e-19	9.9e-19	--
Unigene0014835	0.1753	23.3569	7.05788	6.88727510302698e-321	1.37799849281582e-319	--
Unigene0014838	0.0351	41.9469	10.2229	0	0	--
Unigene0014841	0.001	1.9904	10.9588	0.000276113	0.000432611	--
Unigene0014858	0.001	1252.59	20.2565	0	0	--
Unigene0014863	0.001	0.756	9.56224	0.0156414	0.0212459	--
Unigene0014864	0.001	85.6401	16.386	0	0	RecName: Full=Lectin BRA-3; Flags: Precursor [Megabalanus rosa]
Unigene0014865	0.001	11.8253	13.5296	5.92e-248	9.44e-247	PREDICTED: chondroitin sulfate N-acetylgalactosaminyltransferase 1 isoform X1 [Fopius arisanus]
Unigene0014866	0.001	8.0869	12.9814	1.27e-47	6.13e-47	--
Unigene0014867	0.0593	48.0652	9.66274	0	0	--
Unigene0014868	0.001	42.0909	15.3612	0	0	PREDICTED: histone-lysine N-methyltransferase 2C-like [Saccoglossus kowalevskii]
Unigene0014924	0.1259	30.7472	7.93203	0	0	PREDICTED: zinc metalloproteinase nas-13 isoform X1 [Strongylocentrotus purpuratus]
Unigene0014950	0.001	2.4299	11.2467	3.04e-08	6.13e-08	--
Unigene0014957	0.001	2.0996	11.0359	9.23e-32	3.57e-31	PREDICTED: leucine-rich repeat-containing protein 34-like isoform X2 [Saccoglossus kowalevskii]
Unigene0014984	0.001	3.6775	11.8445	2.93e-10	6.49e-10	--
Unigene0014985	0.001	21.8428	14.4149	8.56e-186	1.07e-184	2-hydroxyacylsphingosine 1-beta-galactosyltransferase [Zootermopsis nevadensis]
Unigene0014987	0.0247	21.1316	9.74068	0	0	--
Unigene0014989	0.1086	19.1458	7.46186	2.51e-111	2.09e-110	--
Unigene0015031	0.001	4.1583	12.0218	1.57e-08	3.21e-08	--
Unigene0015032	0.001	4.3025	12.071	1.11e-09	2.4e-09	--
Unigene0015034	0.1842	1.8429	3.32263	0.0074061	0.0104079	--
Unigene0015054	0.001	10.0807	13.2993	1.69e-25	5.81e-25	--
Unigene0015112	0.0969	8.4545	6.44708	8.17e-209	1.12e-207	PREDICTED: protein SpAN-like [Saccoglossus kowalevskii]
Unigene0015137	0.2387	20.7117	6.4391	0	0	endoglucanase-1,4-beta-glucanase [Daphnia pulex]
Unigene0015213	0.2635	2.2245	3.07761	0.000537698	0.000824613	--
Unigene0015229	0.1738	118.203	9.40962	0	0	--
Unigene0015261	0.001	4.3702	12.0935	1.25e-18	3.66e-18	--
Unigene0015281	0.1014	31.9173	8.29814	0	0	PREDICTED: peptidyl-prolyl cis-trans isomerase-like isoform X2 [Aplysia californica]
Unigene0015305	0.001	5.8617	12.5171	1.74e-29	6.48e-29	--
Unigene0015317	0.1106	40.2795	8.50855	0	0	--
Unigene0015325	0.0995	0.9958	3.32309	0.0074061	0.0104079	--
Unigene0015338	0.001	2.3588	11.2038	5.78e-06	1.02e-05	--
Unigene0015358	0.001	12.9232	13.6577	9.77e-245	1.54e-243	--
Unigene0015378	0.1585	13.3525	6.39648	4.0019317313141e-321	8.0290608105661e-320	PREDICTED: C-type mannose receptor 2-like [Saccoglossus kowalevskii]
Unigene0015420	0.001	0.3287	8.36063	0.0312734	0.0412699	--
Unigene0015436	0.001	1.8306	10.8381	0.000122627	0.000197706	polyubiquitin, partial [Reticulomyxa filosa]
Unigene0015444	0.0565	89.9575	10.6368	0	0	Tolloid-like protein 1 [Crassostrea gigas]
Unigene0015447	0.0805	7.8052	6.5993	8.8e-233	1.32e-231	PREDICTED: polycystic kidney disease protein 1-like 2-like [Metaseiulus occidentalis]
Unigene0015483	0.0338	60.217	10.7989	0	0	PREDICTED: blastula protease 10-like [Strongylocentrotus purpuratus]
Unigene0015500	0.001	44.912	15.4548	0	0	--
Unigene0015543	0.001	154.012	17.2327	0	0	--
Unigene0015584	0.001	41.4847	15.3403	0	0	--
Unigene0015602	0.001	2.9992	11.5504	4.58e-12	1.1e-11	60S ribosomal protein L13 [Theileria orientalis strain Shintoku]
Unigene0015620	0.001	4.5057	12.1375	8.42e-20	2.55e-19	--
Unigene0015621	0.001	8.3033	13.0195	6.43e-19	1.91e-18	--
Unigene0015632	0.1475	27.3021	7.53215	1.97e-59	1.08e-58	--
Unigene0015651	0.0635	9.6848	7.25282	1.92e-234	2.89e-233	Tudor domain-containing protein 1 [Crassostrea gigas]
Unigene0015652	0.001	33.8645	15.0475	0	0	--
Unigene0015659	0.001	4.1342	12.0134	2.93e-10	6.49e-10	--
Unigene0015660	0.001	111.899	16.7718	3.19e-217	4.52e-216	--
Unigene0015661	0.2883	176.259	9.25591	0	0	--
Unigene0015663	0.001	62.2996	15.9269	3.72e-187	4.67e-186	--
Unigene0015665	0.001	3.9652	11.9532	1.75e-13	4.44e-13	--
Unigene0015674	0.229	35.8609	7.29092	0	0	PREDICTED: sperm-associated antigen 6-like [Saccoglossus kowalevskii]
Unigene0015685	0.001	5.8494	12.5141	4.38e-20	1.34e-19	C-type lectin domain containing protein [Haemonchus contortus]
Unigene0015686	0.001	44.9072	15.4547	0	0	mannose receptor C type, partial [Clonorchis sinensis]
Unigene0015687	0.001	8.3549	13.0284	1.69e-27	6.02e-27	--
Unigene0015692	0.001	4.2982	12.0695	2.93e-10	6.49e-10	--
Unigene0015777	0.001	11.4824	13.4871	1.21e-26	4.25e-26	--
Unigene0015778	0.001	60.6669	15.8886	0	0	PREDICTED: uncharacterized protein LOC105210520 [Bactrocera cucurbitae]
Unigene0015779	0.001	46.8481	15.5157	0	0	lectin C-type domain protein [Necator americanus]
Unigene0015780	0.001	2.1353	11.0602	0.000276113	0.000432611	--
Unigene0015796	0.001	0.8856	9.79051	0.000489894	0.000754178	GI21304 [Drosophila mojavensis]
Unigene0015832	0.001	6.2422	12.6078	1.76e-17	5.01e-17	--
Unigene0015847	0.287	2.692	3.22956	0.000104826	0.000170546	--
Unigene0015860	0.0658	21.6498	8.36205	0	0	AAEL011349-PA [Aedes aegypti]
Unigene0015868	0.001	11.6785	13.5116	7.3e-59	3.96e-58	--
Unigene0015872	0.0438	38.0697	9.7635	0	0	--
Unigene0015875	0.028	17.8317	9.3148	7.22e-204	9.71e-203	PREDICTED: UPF0573 protein C2orf70 homolog A-like [Saccoglossus kowalevskii]
Unigene0015888	0.001	9.393	13.1974	1.59e-203	2.14e-202	PREDICTED: short transient receptor potential channel 4-like [Orussus abietinus]
Unigene0015897	0.1217	34.8889	8.1633	0	0	Serine protease snake [Zootermopsis nevadensis]
Unigene0015936	0.1236	2.7828	4.49279	5.24e-13	1.31e-12	--
Unigene0015940	0.001	2.5975	11.3429	4.04e-05	6.76e-05	--
Unigene0015942	0.001	8.1932	13.0002	1.69e-23	5.58e-23	--
Unigene0015943	0.001	20.7106	14.3381	0	0	heat shock protein 40 [Ciona intestinalis]
Unigene0015944	0.001	13.0795	13.675	1.05e-39	4.57e-39	--
Unigene0015945	0.001	22.4218	14.4526	6.5e-253	1.05e-251	AAEL004979-PA [Aedes aegypti]
Unigene0015965	0.001	2.3151	11.1769	7.68e-05	0.000125849	--
Unigene0015995	0.001	46.7521	15.5127	1.32668357803308e-310	0	--
Unigene0015999	0.001	2.9228	11.5131	8.1e-09	1.68e-08	--
Unigene0016001	0.11	321.667	11.5139	0	0	RecName: Full=Lectin BRA-3; Flags: Precursor [Megabalanus rosa]
Unigene0016014	0.001	18.6658	14.1881	4.51e-132	4.25e-131	PREDICTED: probable cytochrome P450 305a1 [Acyrthosiphon pisum]
Unigene0016015	0.001	5.7416	12.4872	1.75e-13	4.44e-13	--
Unigene0016017	0.1219	56.2669	8.85044	0	0	PREDICTED: tektin-4-like [Crassostrea gigas]
Unigene0016028	0.037	73.6216	10.9584	0	0	PREDICTED: thrombospondin-1-like, partial [Hydra vulgaris]
Unigene0016054	0.0883	47.4466	9.06968	0	0	PREDICTED: EF-hand domain-containing family member C2-like [Saccoglossus kowalevskii]
Unigene0016058	0.078	0.5367	2.78257	0.00149764	0.00221763	nek6 si:ch211-167p9.4 NIMA (never in mitosis gene a)-related kinase 6, partial [Clonorchis sinensis]
Unigene0016080	0.0804	34.9384	8.7634	0	0	G-protein coupled receptor Mth2 [Zootermopsis nevadensis]
Unigene0016106	0.2612	16.3352	5.96669	4.15e-201	5.51e-200	GF13556 [Drosophila ananassae]
Unigene0016117	0.001	1.0567	10.0454	0.00391328	0.00561741	--
Unigene0016127	0.001	15.1971	13.8915	4.18e-75	2.66e-74	--
Unigene0016128	0.1187	15.6653	7.04411	1.75e-241	2.72e-240	--
Unigene0016181	0.0435	13.0507	8.2289	1.74e-189	2.21e-188	PREDICTED: protein SpAN-like, partial [Strongylocentrotus purpuratus]
Unigene0016182	0.001	15.7161	13.94	5.55e-203	7.44e-202	--
Unigene0016195	0.001	15.8477	13.952	1.79e-48	8.73e-48	--
Unigene0016201	0.001	9.8589	13.2672	2.84e-60	1.57e-59	--
Unigene0016203	0.001	21.4393	14.388	3.58e-176	4.26e-175	hypothetical protein CAPTEDRAFT_104684 [Capitella teleta]
Unigene0016210	0.001	22.2089	14.4389	4.57e-186	5.72e-185	--
Unigene0016225	0.001	124.483	16.9256	0	0	carcinolectin-5C [Carcinoscorpius rotundicauda]
Unigene0016237	0.0194	179.961	13.1793	0	0	--
Unigene0016298	0.0668	24.5932	8.5242	4.05e-232	6.06e-231	PREDICTED: antichymotrypsin-2-like isoform X5 [Bactrocera cucurbitae]
Unigene0016302	0.001	8.685	13.0843	8.24e-70	5e-69	PREDICTED: antichymotrypsin-2-like isoform X9 [Bactrocera cucurbitae]
Unigene0016313	0.001	0.341	8.41363	0.0156414	0.0212459	PREDICTED: TBC1 domain family member 4-like [Plutella xylostella]
Unigene0016361	0.0795	6.9222	6.44413	5.07e-81	3.41e-80	--
Unigene0016371	0.2244	3.6949	4.04139	7.56e-13	1.87e-12	nahoda, isoform C [Drosophila melanogaster]
Unigene0016379	0.001	45.3461	15.4687	0	0	--
Unigene0016381	0.1662	14.4935	6.44634	8.33e-159	9.11e-158	PREDICTED: 33 kDa inner dynein arm light chain, axonemal [Aplysia californica]
Unigene0016413	0.1784	1.3389	2.90786	0.000491667	0.00075612	--
Unigene0016415	0.001	1.2466	10.2838	0.000489894	0.000754178	--
Unigene0016457	0.2041	13.5393	6.05173	1.72e-176	2.05e-175	Matrix metalloproteinase-16, partial [Stegodyphus mimosarum]
Unigene0016462	0.1582	4.2543	4.7491	3.71e-08	7.44e-08	--
Unigene0016509	0.001	97.7096	16.5762	0	0	--
Unigene0016545	0.001	35.821	15.1285	0	0	--
Unigene0016553	0.1058	2.712	4.67995	1.26e-07	2.47e-07	--
Unigene0016577	0.2376	36.4728	7.26214	3.77e-281	6.66e-280	--
Unigene0016578	0.1146	5.7341	5.64489	1.81e-15	4.89e-15	--
Unigene0016580	0.0835	39.5428	8.88742	4.55e-297	8.47e-296	--
Unigene0016581	0.001	12.7222	13.6351	5.13e-36	2.12e-35	--
Unigene0016582	0.001	39.6512	15.2751	3.59e-95	2.69e-94	--
Unigene0016588	0.001	11.2532	13.458	9.32e-34	3.73e-33	--
Unigene0016591	0.1413	1.2371	3.13013	0.0129695	0.0177627	--
Unigene0016592	0.001	1.1956	10.2235	0.00391328	0.00561741	--
Unigene0016593	0.1668	2.0857	3.64434	0.000732495	0.00111306	--
Unigene0016617	0.001	37.6159	15.1991	0	0	--
Unigene0016626	0.001	0.6162	9.26725	0.0312734	0.0412699	--
Unigene0016629	0.035	28.7341	9.68119	0	0	PREDICTED: tektin-3 [Ciona intestinalis]
Unigene0016654	0.0898	37.2444	8.69609	0	0	PREDICTED: dickkopf-related protein 3 [Strongylocentrotus purpuratus]
Unigene0016660	0.001	1.6381	10.6778	0.000489894	0.000754178	ribosomal protein s4 X isoform [Salpingoeca rosetta]
Unigene0016666	0.1672	0.9407	2.49216	0.00756354	0.0106159	--
Unigene0016667	0.001	1.2862	10.3289	3.01e-06	5.44e-06	--
Unigene0016713	0.0713	45.1877	9.30781	1.62e-202	2.17e-201	--
Unigene0016715	0.001	13.9197	13.7648	3.97e-41	1.76e-40	--
Unigene0016764	0.1323	26.3229	7.63636	0	0	PREDICTED: RIB43A-like with coiled-coils protein 2-like [Saccoglossus kowalevskii]
Unigene0016771	0.1722	2.4767	3.84626	0.000222778	0.000351847	--
Unigene0016773	0.1664	5.6188	5.07753	2.98e-20	9.12e-20	--
Unigene0016814	0.242	2.875	3.57048	3.53e-06	6.33e-06	PREDICTED: protein turtle homolog B [Tribolium castaneum]
Unigene0016816	0.001	12.2103	13.5758	6.58e-279	1.16e-277	PREDICTED: protein phosphatase 1 regulatory subunit 36 [Strongylocentrotus purpuratus]
Unigene0016819	0.001	1.4826	10.5339	0.00097925	0.00147092	myosin heavy chain isoform 3 [Daphnia pulex]
Unigene0016843	0.0251	14.2772	9.15181	1.51e-181	1.85e-180	Zinc finger protein 84, partial [Stegodyphus mimosarum]
Unigene0016870	0.2156	5.0549	4.55125	6.52e-51	3.27e-50	--
Unigene0016871	0.0852	6.3673	6.22368	2.17e-46	1.03e-45	--
Unigene0016884	0.001	2.8792	11.4915	2.03e-11	4.75e-11	--
Unigene0016888	0.0414	91.285	11.1065	0	0	PREDICTED: C-type lectin mannose-binding isoform-like [Saccoglossus kowalevskii]
Unigene0016889	0.154	60.213	8.611	4.35e-246	6.87e-245	--
Unigene0016893	0.0582	61.6401	10.0486	0	0	--
Unigene0016945	0.001	17.897	14.1274	0	0	PREDICTED: macrophage mannose receptor 1-like isoform X3 [Crassostrea gigas]
Unigene0016971	0.1779	13.1956	6.21285	1.92e-177	2.29e-176	PREDICTED: proclotting enzyme-like [Orussus abietinus]
Unigene0016973	0.001	3.8253	11.9014	4.58e-28	1.65e-27	--
Unigene0016987	0.001	2.534	11.3072	7.68e-05	0.000125849	--
Unigene0017005	0.0289	69.978	11.2416	0	0	--
Unigene0017057	0.001	2.3091	11.1731	8.1e-09	1.68e-08	--
Unigene0017058	0.001	8.3656	13.0303	5.13e-36	2.12e-35	--
Unigene0017059	0.001	15.4099	13.9116	6.05e-130	5.65e-129	--
Unigene0017060	0.001	1.5906	10.6354	6.14e-05	0.000101469	--
Unigene0017117	0.001	127.35	16.9584	0	0	PREDICTED: CD63 antigen [Bactrocera dorsalis]
Unigene0017118	0.1224	236.068	10.9134	0	0	PREDICTED: major facilitator superfamily domain-containing protein 8-like isoform X1 [Crassostrea gigas]
Unigene0017144	0.0923	25.4897	8.10937	0	0	--
Unigene0017170	0.001	16.7936	14.0356	2.91e-184	3.6e-183	PREDICTED: O(6)-methylguanine-induced apoptosis 2-like [Amphimedon queenslandica]
Unigene0017171	0.001	14.6039	13.8341	0	0	sodium potassium ATPase subunit alpha 2 [Balanus improvisus]
Unigene0017177	0.001	5.5894	12.4485	1.89e-35	7.76e-35	--
Unigene0017183	0.001	3.5207	11.7816	2.46e-14	6.4e-14	--
Unigene0017184	0.001	10.1173	13.3045	3.66e-80	2.45e-79	--
Unigene0017185	0.001	11.6465	13.5076	2.11e-68	1.26e-67	--
Unigene0017186	0.001	10.5212	13.361	1.56e-91	1.13e-90	--
Unigene0017199	0.001	0.6092	9.25077	0.0312734	0.0412699	--
Unigene0017203	0.001	7.9735	12.961	5.56e-42	2.49e-41	--
Unigene0017230	0.2104	15.3466	6.18864	1.09e-66	6.42e-66	GA21795 [Drosophila pseudoobscura pseudoobscura]
Unigene0017232	0.001	18.3955	14.1671	7.14e-85	4.95e-84	--
Unigene0017264	0.001	20.5719	14.3284	0	0	PREDICTED: macrophage mannose receptor 1-like isoform X3 [Crassostrea gigas]
Unigene0017268	0.001	196.184	17.5818	0	0	PREDICTED: endothelin-converting enzyme 1-like [Crassostrea gigas]
Unigene0017350	0.0528	4.5907	6.44203	2.16e-27	7.68e-27	--
Unigene0017352	0.001	49.0858	15.583	1.97e-169	2.27e-168	PREDICTED: mucin-2 isoform X1 [Bombyx mori]
Unigene0017356	0.001	1.6892	10.7221	0.000122627	0.000197706	Chondroitin proteoglycan 2, partial [Stegodyphus mimosarum]
Unigene0017357	0.1435	9.1529	5.99511	9.72e-21	3.01e-20	Chondroitin proteoglycan 2, partial [Stegodyphus mimosarum]
Unigene0017361	0.2136	33.8367	7.30753	5.36e-149	5.57e-148	Chondroitin proteoglycan 2, partial [Stegodyphus mimosarum]
Unigene0017362	0.0702	49.4409	9.46002	0	0	peritrophic matrix protein 14 precursor [Tribolium castaneum]
Unigene0017363	0.001	3.074	11.5859	2.2e-07	4.23e-07	PREDICTED: acidic mammalian chitinase-like isoform X1 [Crassostrea gigas]
Unigene0017373	0.0415	33.5475	9.65888	0	0	Tektin-3 [Zootermopsis nevadensis]
Unigene0017384	0.001	1.7313	10.7576	1.04e-11	2.46e-11	--
Unigene0017385	0.001	0.6669	9.38133	0.000489894	0.000754178	--
Unigene0017413	0.001	39.9049	15.2843	0	0	Allene oxide synthase-lipoxygenase protein, partial [Stegodyphus mimosarum]
Unigene0017414	0.0659	9.2585	7.13436	1.52e-173	1.78e-172	PREDICTED: dynein heavy chain 3, axonemal-like [Aplysia californica]
Unigene0017427	0.1084	20.2024	7.54202	8.21e-231	1.22e-229	--
Unigene0017429	0.001	38.5857	15.2358	1.21e-105	9.71e-105	--
Unigene0017430	0.0684	27.149	8.63269	3.38e-249	5.42e-248	--
Unigene0017455	0.1107	45.4031	8.67999	2.42e-257	3.98e-256	--
Unigene0017475	0.001	8.1079	12.9851	9.33e-36	3.85e-35	--
Unigene0017483	0.001	6.6756	12.7047	1.31e-49	6.48e-49	--
Unigene0017484	0.001	7.4846	12.8697	1.69e-25	5.81e-25	PREDICTED: dynein heavy chain 3, axonemal-like [Saccoglossus kowalevskii]
Unigene0017485	0.001	7.8827	12.9445	1.85e-50	9.21e-50	dynein heavy chain isotype 7B, partial [Tripneustes gratilla]
Unigene0017486	0.2683	9.6987	5.17587	0	0	PREDICTED: dynein heavy chain 12, axonemal-like [Crassostrea gigas]
Unigene0017487	0.1642	4.928	4.90748	1.5e-17	4.29e-17	--
Unigene0017488	0.001	4.6995	12.1983	4.38e-20	1.34e-19	PREDICTED: dynein heavy chain 3, axonemal-like [Saccoglossus kowalevskii]
Unigene0017491	0.001	1.2716	10.3124	2.39e-12	5.79e-12	PREDICTED: dynein heavy chain 12, axonemal-like [Crassostrea gigas]
Unigene0017492	0.001	7.5171	12.876	1.85e-50	9.21e-50	PREDICTED: dynein heavy chain 7, axonemal-like [Saccoglossus kowalevskii]
Unigene0017493	0.1143	5.1448	5.49222	5.91e-40	2.58e-39	PREDICTED: dynein heavy chain 7, axonemal-like [Saccoglossus kowalevskii]
Unigene0017494	0.0512	5.1714	6.65827	2.06e-63	1.17e-62	Dynein heavy chain 7, axonemal [Crassostrea gigas]
Unigene0017495	0.001	3.877	11.9207	3.43e-15	9.17e-15	PREDICTED: dynein heavy chain 3, axonemal-like isoform X5 [Crassostrea gigas]
Unigene0017497	0.001	9.0283	13.1402	4.99e-51	2.51e-50	PREDICTED: dynein heavy chain 3, axonemal-like isoform X5 [Crassostrea gigas]
Unigene0017498	0.1147	7.0693	5.94563	1.08e-198	1.43e-197	PREDICTED: dynein heavy chain 7, axonemal-like [Saccoglossus kowalevskii]
Unigene0017499	0.0671	6.9594	6.69651	1.28e-189	1.63e-188	Dynein heavy chain 7, axonemal [Crassostrea gigas]
Unigene0017500	0.001	8.1101	12.9855	5.13e-36	2.12e-35	PREDICTED: dynein heavy chain 3, axonemal-like isoform X3 [Crassostrea gigas]
Unigene0017502	0.0244	61.2688	11.2941	0	0	PREDICTED: outer dense fiber protein 3-B-like [Amphimedon queenslandica]
Unigene0017520	0.001	68.522	16.0643	0	0	Arginine kinase [Halocaridina rubra]
Unigene0017525	0.0491	29.0218	9.2072	0	0	--
Unigene0017526	0.1969	49.0121	7.95953	1.06e-306	2.02e-305	hypothetical protein NEMVEDRAFT_v1g19465 [Nematostella vectensis]
Unigene0017544	0.0966	124.33	10.3299	0	0	PREDICTED: endothelin-converting enzyme 1-like [Crassostrea gigas]
Unigene0017545	0.0435	22.961	9.04395	0	0	--
Unigene0017549	0.1625	472.346	11.5052	0	0	serine protease-like protein [Fenneropenaeus chinensis]
Unigene0017576	0.2693	68.1073	7.98245	3.86e-160	4.25e-159	--
Unigene0017597	0.2168	30.2502	7.12444	0	0	--
Unigene0017615	0.1371	3.3441	4.60832	4.26e-07	8.09e-07	PREDICTED: protein tramtrack, beta isoform-like isoform X3 [Fopius arisanus]
Unigene0017618	0.0826	6.1686	6.22266	2.17e-46	1.03e-45	--
Unigene0017653	0.1107	3.6509	5.04353	5.6e-38	2.39e-37	PREDICTED: alaserpin-like isoform X5 [Bactrocera dorsalis]
Unigene0017690	0.2977	831.605	11.4478	0	0	--
Unigene0017703	0.001	1.7574	10.7792	4.04e-05	6.76e-05	--
Unigene0017706	0.001	37.8453	15.2078	0	0	--
Unigene0017712	0.1322	22.2419	7.39441	9.22e-258	1.52e-256	--
Unigene0017722	0.001	7.7028	12.9112	1.02e-37	4.33e-37	GE23889 [Drosophila yakuba]
Unigene0017735	0.001	0.7534	9.55727	0.00391328	0.00561741	--
Unigene0017770	0.0797	28.4864	8.48148	0	0	--
Unigene0017771	0.001	31.4389	14.9403	6.74e-304	1.28e-302	--
Unigene0017793	0.0856	6.2629	6.19308	5.19e-45	2.42e-44	PREDICTED: iron/zinc purple acid phosphatase-like protein isoform X3 [Ceratitis capitata]
Unigene0017794	0.1212	6.4036	5.72342	4.3e-32	1.67e-31	PREDICTED: iron/zinc purple acid phosphatase-like protein [Aplysia californica]
Unigene0017796	0.001	3.7937	11.8894	8.1e-09	1.68e-08	--
Unigene0017809	0.1407	565.853	11.9736	0	0	--
Unigene0017811	0.001	17.7396	14.1147	8.18045889085922e-310	0	peroxinectin [Pacifastacus leniusculus]
Unigene0017812	0.001	14.712	13.8447	1e-80	6.73e-80	peroxinectin [Fenneropenaeus chinensis]
Unigene0017848	0.001	1.2938	10.3374	0.000276113	0.000432611	AGAP003020-PA [Anopheles gambiae str. PEST]
Unigene0017849	0.001	6.6734	12.7042	2.3e-28	8.38e-28	--
Unigene0017850	0.0707	6.296	6.47658	7.11e-56	3.76e-55	trypsin [Homarus americanus]
Unigene0017852	0.1226	2.3765	4.27681	3.07e-06	5.54e-06	--
Unigene0017871	0.001	3.7442	11.8704	6.48e-13	1.61e-12	--
Unigene0017887	0.1865	6.3564	5.09096	1.59e-20	4.91e-20	--
Unigene0017888	0.001	7.9594	12.9584	1.79e-48	8.73e-48	94-kilodalton protein [Babesia microti]
Unigene0017919	0.0239	19.1882	9.64899	0	0	PREDICTED: glutamate-rich protein 6-like [Aplysia californica]
Unigene0017926	0.2452	1.5843	2.69181	0.00019426	0.000307701	PREDICTED: vesicular glutamate transporter 1-like [Nasonia vitripennis]
Unigene0017945	0.001	1.7455	10.7694	0.000276113	0.000432611	--
Unigene0017951	0.0652	29.6496	8.82892	0	0	Venom allergen 5, partial [Stegodyphus mimosarum]
Unigene0017988	0.001	4.5454	12.1502	2.46e-16	6.8e-16	--
Unigene0018015	0.1767	29.1484	7.36597	0	0	--
Unigene0018016	0.001	2.4285	11.2458	8.16e-07	1.52e-06	--
Unigene0018021	0.001	3.2217	11.6536	5.7e-10	1.25e-09	--
Unigene0018038	0.001	9.759	13.2525	2.81e-67	1.66e-66	--
Unigene0018039	0.001	7.939	12.9547	2.82e-106	2.27e-105	--
Unigene0018075	0.001	0.5397	9.07601	0.00782344	0.0109487	--
Unigene0018099	0.001	5.1697	12.3359	6.62e-15	1.75e-14	--
Unigene0018101	0.001	255.62	17.9636	0	0	--
Unigene0018102	0.2224	869.674	11.9331	0	0	--
Unigene0018103	0.001	1.3105	10.3559	0.000489894	0.000754178	--
Unigene0018109	0.001	19.5501	14.2549	3.36e-244	5.27e-243	--
Unigene0018120	0.1666	10.4429	5.96999	3.57e-76	2.29e-75	AGAP008919-PA [Anopheles gambiae str. PEST]
Unigene0018125	0.2884	10.1668	5.13965	1.03e-79	6.86e-79	--
Unigene0018177	0.1842	1.267	2.78207	0.00149764	0.00221763	--
Unigene0018180	0.001	24.6967	14.592	0	0	--
Unigene0018197	0.001	22.4626	14.4552	3.78e-121	3.34e-120	--
Unigene0018198	0.0462	16.3167	8.46424	0	0	PREDICTED: synaptonemal complex protein 1-like isoform X1 [Aplysia californica]
Unigene0018206	0.001	3.2028	11.6451	5.88e-08	1.17e-07	--
Unigene0018207	0.1446	57.3058	8.63047	0	0	PREDICTED: ubiquitin carboxyl-terminal hydrolase 8 isoform X2 [Musca domestica]
Unigene0018226	0.001	3.5162	11.7798	1.67e-21	5.27e-21	hsp90 protein [Babesia bovis]
Unigene0018236	0.001	8.751	13.0952	3.55e-50	1.76e-49	--
Unigene0018238	0.001	8.1075	12.985	4.53e-20	1.38e-19	--
Unigene0018258	0.001	1.0492	10.0351	0.000489894	0.000754178	PREDICTED: probable dolichol-phosphate mannosyltransferase [Bombus impatiens]
Unigene0018264	0.1746	1.5289	3.13037	0.0129695	0.0177627	odd-skipped 2 protein [Parhyale hawaiensis]
Unigene0018279	0.0198	15.6569	9.62708	7.11e-252	1.15e-250	PREDICTED: glutamate-rich protein 3-like isoform X7 [Crassostrea gigas]
Unigene0018293	0.2009	11.3036	5.81416	6.02e-196	7.85e-195	hypothetical protein BRAFLDRAFT_121645 [Branchiostoma floridae]
Unigene0018313	0.0175	8.3621	8.90037	1.84e-153	1.96e-152	PREDICTED: HORMA domain-containing protein 1-like [Aplysia californica]
Unigene0018316	0.001	25.8088	14.6556	1.59e-145	1.61e-144	--
Unigene0018318	0.1536	1.2488	3.02329	0.0225028	0.0301847	--
Unigene0018331	0.001	9.2306	13.1722	3.88e-39	1.68e-38	TNF receptor-associated factor 6 [Zootermopsis nevadensis]
Unigene0018357	0.0282	34.3828	10.2518	0	0	--
Unigene0018377	0.1452	2.6329	4.18054	1.06e-05	1.85e-05	--
Unigene0018390	0.001	11.1668	13.4469	2.56e-74	1.61e-73	PREDICTED: LOW QUALITY PROTEIN: tyrosine-protein phosphatase Lar-like [Ceratosolen solmsi marchali]
Unigene0018391	0.1226	14.9641	6.9314	1.78e-187	2.24e-186	PREDICTED: roundabout homolog 2-like [Fopius arisanus]
Unigene0018399	0.2769	70.2293	7.98656	0	0	PREDICTED: cilia- and flagella-associated protein 45-like [Aplysia californica]
Unigene0018401	0.2622	63.3467	7.91646	0	0	Protein mab-21 [Crassostrea gigas]
Unigene0018402	0.001	31.0879	14.9241	0	0	PREDICTED: peptidyl-prolyl cis-trans isomerase-like [Nasonia vitripennis]
Unigene0018415	0.1505	3.6703	4.60806	4.26e-07	8.09e-07	--
Unigene0018421	0.0951	5.6689	5.89748	3.73e-54	1.94e-53	--
Unigene0018423	0.0202	8.685	8.74803	1.97e-269	3.38e-268	GI15257 [Drosophila mojavensis]
Unigene0018424	0.0158	17.7662	10.135	0	0	--
Unigene0018426	0.001	26.925	14.7167	0	0	PREDICTED: testis-specific serine/threonine-protein kinase 3-like [Harpegnathos saltator]
Unigene0018427	0.001	3.3073	11.6914	3.37e-13	8.45e-13	--
Unigene0018454	0.0196	35.1681	10.8092	0	0	--
Unigene0018496	0.0942	210.749	11.1275	0	0	PREDICTED: ficolin-2-like [Crassostrea gigas]
Unigene0018498	0.2298	96.0744	8.70763	0	0	PREDICTED: ryncolin-1-like [Strongylocentrotus purpuratus]
Unigene0018505	0.001	1.7556	10.7777	0.000245094	0.000385742	--
Unigene0018541	0.001	7.9756	12.9614	9.2e-16	2.5e-15	--
Unigene0018552	0.0607	16.0827	8.0496	0	0	PREDICTED: dynein assembly factor 1, axonemal-like [Amphimedon queenslandica]
Unigene0018554	0.001	1.5321	10.5813	5.78e-06	1.02e-05	--
Unigene0018555	0.001	15.364	13.9073	7.53e-163	8.39e-162	PREDICTED: cysteine-rich motor neuron 1 protein [Strongylocentrotus purpuratus]
Unigene0018556	0.0137	27.3623	10.9638	0	0	PREDICTED: BMP-binding endothelial regulator protein [Cerapachys biroi]
Unigene0018557	0.001	17.8222	14.1214	1.09e-43	4.97e-43	--
Unigene0018558	0.001	5.6807	12.4719	2.74e-12	6.62e-12	--
Unigene0018559	0.001	15.3694	13.9078	9.32e-34	3.73e-33	--
Unigene0018560	0.1168	45.6212	8.60952	0	0	PREDICTED: extracellular matrix protein FRAS1-like [Ciona intestinalis]
Unigene0018561	0.001	24.6451	14.589	9.34e-49	4.56e-48	--
Unigene0018563	0.001	18.2457	14.1553	3.2e-44	1.47e-43	--
Unigene0018564	0.001	11.68	13.5118	4.55e-24	1.52e-23	--
Unigene0018586	0.2119	17.3284	6.35361	0	0	PREDICTED: beta-1,4-glucuronyltransferase 1 [Linepithema humile]
Unigene0018601	0.2834	6.6738	4.5576	1.13e-19	3.42e-19	--
Unigene0018607	0.001	21.5142	14.393	0	0	PREDICTED: blastula protease 10-like, partial [Strongylocentrotus purpuratus]
Unigene0018611	0.001	7.1391	12.8015	8.56e-186	1.07e-184	Protein CBG27950 [Caenorhabditis briggsae]
Unigene0018612	0.001	1.9213	10.9079	4.18e-09	8.81e-09	PREDICTED: uncharacterized protein LOC105440197 [Strongylocentrotus purpuratus]
Unigene0018615	0.0641	5.6076	6.45092	2.16e-27	7.68e-27	--
Unigene0018617	0.2285	3.5728	3.96679	9.65e-09	2e-08	PREDICTED: uncharacterized protein LOC105440709 [Strongylocentrotus purpuratus]
Unigene0018650	0.001	24.7048	14.5925	0	0	PREDICTED: protein FAM169B-like [Athalia rosae]
Unigene0018732	0.001	4.8213	12.2352	1.21e-22	3.92e-22	--
Unigene0018733	0.001	2.369	11.2101	7.68e-05	0.000125849	--
Unigene0018790	0.001	171.919	17.3914	0	0	--
Unigene0018808	0.1449	25.6433	7.46738	1.33e-111	1.11e-110	--
Unigene0018809	0.001	57.4995	15.8113	4.16e-200	5.51e-199	--
Unigene0018829	0.0428	22.6301	9.04642	0	0	PREDICTED: proteoglycan 4-like [Aplysia californica]
Unigene0018840	0.083	9.8108	6.88512	8.52e-111	7.07e-110	PREDICTED: protein phosphatase 1 regulatory subunit 42-like [Aplysia californica]
Unigene0018844	0.1505	4.6585	4.95203	4.35e-18	1.26e-17	--
Unigene0018846	0.2246	39.2285	7.4484	0	0	Gamma-crystallin-1 [Lepeophtheirus salmonis]
Unigene0018852	0.0064	17.8514	11.4457	0	0	DNA-binding protein with twelve Zn fingers [Strongylocentrotus purpuratus]
Unigene0018876	0.1172	9.8174	6.3883	5.33e-27	1.88e-26	--
Unigene0018935	0.001	6.3755	12.6383	2.36e-45	1.1e-44	Tumor protein p53-inducible protein 13 [Harpegnathos saltator]
Unigene0018984	0.128	88.3115	9.43031	0	0	--
Unigene0018985	0.001	3.8765	11.9205	3.04e-08	6.13e-08	--
Unigene0018988	0.001	2.5274	11.3034	1.11e-05	1.92e-05	--
Unigene0018998	0.2655	21.3555	6.32975	5.1e-261	8.49e-260	PCTP-like protein [Zootermopsis nevadensis]
Unigene0019017	0.001	74.6577	16.188	0	0	PREDICTED: blastula protease 10-like [Crassostrea gigas]
Unigene0019018	0.0413	34.505	9.70645	0	0	Receptor-type tyrosine-protein phosphatase beta [Cerapachys biroi]
Unigene0019031	0.0375	192.048	12.3223	0	0	PREDICTED: vitellogenin receptor [Athalia rosae]
Unigene0019037	0.001	27.9353	14.7698	0	0	--
Unigene0019038	0.0967	43.6734	8.81902	5.75e-283	1.02e-281	Collagen alpha-1(IV) chain [Crassostrea gigas]
Unigene0019039	0.2184	26.088	6.90027	7.47e-75	4.74e-74	--
Unigene0019047	0.001	3.8259	11.9016	8.1e-09	1.68e-08	--
Unigene0019103	0.001	15.1124	13.8834	2.15e-224	3.12e-223	SJCHGC05363 protein [Schistosoma japonicum]
Unigene0019118	0.2683	3.6069	3.74884	1.9e-07	3.69e-07	--
Unigene0019122	0.2221	42.2162	7.57044	0	0	--
Unigene0019150	0.001	3.9407	11.9442	4.18e-09	8.81e-09	--
Unigene0019151	0.001	3.5963	11.8123	2.2e-07	4.23e-07	--
Unigene0019178	0.0174	79.3171	12.1543	0	0	--
Unigene0019240	0.001	0.9386	9.87437	0.0156414	0.0212459	--
Unigene0019241	0.1112	2.2248	4.32245	1.65e-06	3.02e-06	--
Unigene0019263	0.0244	21.9763	9.81485	3.12e-284	5.59e-283	--
Unigene0019277	0.0354	99.0545	11.4503	0	0	PREDICTED: protein SpAN isoform X2 [Strongylocentrotus purpuratus]
Unigene0019311	0.001	9.7059	13.2446	1.25e-185	1.56e-184	--
Unigene0019319	0.001	9.2039	13.168	2.3e-28	8.38e-28	--
Unigene0019321	0.001	6.7657	12.724	8.64e-28	3.1e-27	--
Unigene0019331	0.0442	67.7394	10.5817	0	0	ecdysteroid-regulated protein [Litopenaeus vannamei]
Unigene0019334	0.001	8.1799	12.9979	1.34e-79	8.88e-79	AGAP002310-PA [Anopheles gambiae str. PEST]
Unigene0019354	0.1909	3.5801	4.22911	2.01e-39	8.74e-39	AAEL009939-PA [Aedes aegypti]
Unigene0019359	0.0423	14.6018	8.43127	2.37e-218	3.37e-217	PREDICTED: nucleoside diphosphate kinase 7-like [Crassostrea gigas]
Unigene0019360	0.001	2.5484	11.3154	1.24e-12	3.06e-12	nmdyn-D7 [Drosophila melanogaster]
Unigene0019363	0.001	2.3624	11.206	5.88e-08	1.17e-07	--
Unigene0019395	0.001	1.2582	10.2971	1.11e-05	1.92e-05	--
Unigene0019418	0.2617	10.2259	5.28817	3.53e-23	1.16e-22	--
Unigene0019420	0.001	4.1893	12.0325	8.1e-09	1.68e-08	--
Unigene0019421	0.161	10.5691	6.03665	2.48e-20	7.61e-20	--
Unigene0019431	0.001	4.9658	12.2778	2.46e-16	6.8e-16	--
Unigene0019445	0.001	37.8231	15.207	0	0	PREDICTED: blastula protease 10-like [Strongylocentrotus purpuratus]
Unigene0019476	0.0392	81.422	11.0203	0	0	PREDICTED: macrophage mannose receptor 1-like isoform X1 [Crassostrea gigas]
Unigene0019478	0.001	3.0198	11.5602	5.78e-06	1.02e-05	--
Unigene0019496	0.2314	3.0386	3.71495	3.43e-07	6.56e-07	--
Unigene0019560	0.0449	18.3557	8.6753	1.08e-257	1.77e-256	PREDICTED: mucin-1-like isoform X3 [Megachile rotundata]
Unigene0019581	0.0655	23.0162	8.45694	0	0	glucuronate isomerase [Lasius niger]
Unigene0019589	0.001	6.3354	12.6292	9.08e-18	2.6e-17	--
Unigene0019646	0.001	39.8563	15.2825	0	0	--
Unigene0019658	0.048	145.29	11.5636	0	0	AAEL001675-PA [Aedes aegypti]
Unigene0019700	0.001	13.0362	13.6702	4.99e-51	2.51e-50	--
Unigene0019704	0.001	4.5556	12.1534	3.37e-13	8.45e-13	--
Unigene0019713	0.1308	3.1087	4.57088	4.26e-07	8.09e-07	--
Unigene0019718	0.1702	39.1818	7.84681	0	0	PREDICTED: indole-3-acetic acid-amido synthetase GH3.6-like, partial [Saccoglossus kowalevskii]
Unigene0019740	0.001	8.5649	13.0642	4.05e-61	2.26e-60	--
Unigene0019779	0.001	1.8054	10.8181	0.000122627	0.000197706	--
Unigene0019781	0.2473	10.1122	5.35369	3.58791122447336e-314	7.03789903231551e-313	PREDICTED: WD repeat-containing protein on Y chromosome isoform X3 [Strongylocentrotus purpuratus]
Unigene0019791	0.1683	3.2622	4.27674	3.07e-06	5.54e-06	--
Unigene0019808	0.001	2.0284	10.9861	1.57e-06	2.88e-06	--
Unigene0019827	0.1308	34.0011	8.02208	0	0	--
Unigene0019834	0.1951	35.4456	7.50525	0	0	--
Unigene0019835	0.001	59.709	15.8657	0	0	--
Unigene0019845	0.1382	3.1963	4.53157	7.81e-07	1.46e-06	--
Unigene0019874	0.2358	4.645	4.30004	6.76e-11	1.54e-10	--
Unigene0019875	0.001	1.4332	10.485	0.00097925	0.00147092	--
Unigene0019928	0.001	3.1028	11.5994	8.1e-09	1.68e-08	--
Unigene0019929	0.001	6.2425	12.6079	3.78e-121	3.34e-120	--
Unigene0019930	0.0055	9.5513	10.762	0	0	--
Unigene0019938	0.0343	42.566	10.2773	0	0	--
Unigene0019960	0.001	0.6319	9.30355	0.00391328	0.00561741	--
Unigene0019977	0.001	3.3522	11.7109	2.2e-07	4.23e-07	--
Unigene0019996	0.0244	14.6406	9.22888	0	0	PREDICTED: collagen alpha-1(III) chain-like [Ceratosolen solmsi marchali]
Unigene0020003	0.0863	0.9714	3.49263	0.0023592	0.00344635	--
Unigene0020015	0.2956	2.2643	2.93735	1.1e-06	2.04e-06	--
Unigene0020050	0.001	130.864	16.9977	0	0	PREDICTED: protein FAM166B-like [Saccoglossus kowalevskii]
Unigene0020096	0.0162	22.303	10.427	0	0	Av71 muscle cell intermediate filament [Culex quinquefasciatus]
Unigene0020103	0.001	2.5116	11.2944	3.4e-17	9.61e-17	--
Unigene0020120	0.1627	13.1816	6.34017	3.52e-170	4.07e-169	--
Unigene0020121	0.1472	13.4398	6.51259	1.55e-57	8.33e-57	--
Unigene0020165	0.2063	15.2677	6.2096	0	0	PREDICTED: centrosomal protein of 83 kDa [Strongylocentrotus purpuratus]
Unigene0020177	0.001	2.5849	11.3359	4.04e-05	6.76e-05	C. briggsae CBR-RPL-33 protein [Caenorhabditis briggsae]
Unigene0020224	0.2938	1.6537	2.49279	0.00152433	0.00225462	T-complex protein 1 subunit beta, partial [Drosophila silvestris]
Unigene0020226	0.0979	1.0412	3.41079	0.00419502	0.00600506	T-complex protein 1 subunit beta, partial [Drosophila silvestris]
Unigene0020251	0.001	4.5551	12.1533	1.69e-23	5.58e-23	--
Unigene0020252	0.001	21.8121	14.4128	2.48e-94	1.85e-93	--
Unigene0020253	0.0275	29.7698	10.0802	0	0	PREDICTED: lysine histidine transporter-like 2 [Aplysia californica]
Unigene0020263	0.1198	264.031	11.1059	0	0	vitellogenin [Trigonotylus caelestialium]
Unigene0020265	0.001	21.2655	14.3762	0	0	PREDICTED: blastula protease 10-like, partial [Strongylocentrotus purpuratus]
Unigene0020267	0.1603	69.3207	8.75637	0	0	--
Unigene0020268	0.1544	54.6075	8.46628	0	0	e3 ubiquitin-protein ligase rnf216 [Lasius niger]
Unigene0020269	0.1244	90.5317	9.50729	0	0	fam-a protein [Plasmodium chabaudi chabaudi]
Unigene0020288	0.0637	69.2286	10.0859	0	0	--
Unigene0020294	0.001	37.5673	15.1972	0	0	--
Unigene0020327	0.2321	6.1689	4.73219	1.92e-44	8.89e-44	--
Unigene0020332	0.1912	4.8216	4.65636	2.9e-21	9.11e-21	--
Unigene0020339	0.001	4.1518	12.0195	1.24e-12	3.06e-12	PREDICTED: separin [Strongylocentrotus purpuratus]
Unigene0020371	0.2732	119.089	8.76787	3.43e-274	5.97e-273	--
Unigene0020372	0.001	65.9989	16.0102	8.18e-118	7.11e-117	--
Unigene0020373	0.0971	515.672	12.3747	0	0	--
Unigene0020374	0.0927	448.396	12.2399	0	0	--
Unigene0020411	0.056	20.7255	8.53176	0	0	PREDICTED: radial spoke head protein 4 homolog A-like [Saccoglossus kowalevskii]
Unigene0020538	0.001	0.8639	9.75472	0.00782344	0.0109487	--
Unigene0020539	0.001	3.3792	11.7225	7.72e-11	1.76e-10	--
Unigene0020541	0.035	11.532	8.36407	1.73e-208	2.36e-207	PREDICTED: basigin-like isoform X2 [Crassostrea gigas]
Unigene0020553	0.0252	13.724	9.08906	2.81e-174	3.31e-173	--
Unigene0020554	0.0281	20.23	9.49171	0	0	--
Unigene0020599	0.001	25.7869	14.6544	0	0	PREDICTED: zinc finger protein 726-like [Saccoglossus kowalevskii]
Unigene0020644	0.0789	2.5175	4.99582	8.98e-10	1.96e-09	PREDICTED: dynein assembly factor 3, axonemal-like [Saccoglossus kowalevskii]
Unigene0020669	0.1923	1.9243	3.3229	6.02e-05	9.98e-05	--
Unigene0020671	0.0695	10.1532	7.19071	1.6e-180	1.95e-179	--
Unigene0020682	0.1247	38.196	8.25882	4.5e-194	5.83e-193	PREDICTED: exonuclease mut-7 homolog [Harpegnathos saltator]
Unigene0020683	0.2674	23.35	6.44828	0	0	PREDICTED: LOW QUALITY PROTEIN: transcription initiation factor TFIID subunit 1 [Ceratosolen solmsi marchali]
Unigene0020688	0.1366	8.9701	6.03709	2.48e-20	7.61e-20	--
Unigene0020693	0.0916	6.103	6.05803	2.6e-41	1.15e-40	--
Unigene0020730	0.204	1.9771	3.27674	6.02e-05	9.98e-05	--
Unigene0020750	0.001	12.276	13.5836	3.01e-62	1.7e-61	--
Unigene0020752	0.0327	18.051	9.10857	0	0	PREDICTED: thioredoxin reductase 1, cytoplasmic-like [Crassostrea gigas]
Unigene0020762	0.001	27.338	14.7386	0	0	--
Unigene0020766	0.161	6.3415	5.29969	1.64e-12	4e-12	--
Unigene0020822	0.2042	6.0432	4.88726	3.02e-25	1.03e-24	--
Unigene0020839	0.001	6.4449	12.6539	4.5e-22	1.44e-21	Multiple inositol polyphosphate phosphatase 1 [Zootermopsis nevadensis]
Unigene0020842	0.1589	1.6892	3.41015	0.00419502	0.00600506	integrin alpha 4, partial [Fenneropenaeus chinensis]
Unigene0020860	0.001	16.0401	13.9694	2.09e-43	9.55e-43	--
Unigene0020875	0.1065	149.562	10.4557	0	0	hypothetical protein BRAFLDRAFT_74046 [Branchiostoma floridae]
Unigene0020878	0.001	0.8904	9.79831	0.0156414	0.0212459	--
Unigene0020889	0.001	11.3395	13.4691	1.04e-59	5.7e-59	--
Unigene0020890	0.001	3.3575	11.7132	1.28e-14	3.35e-14	--
Unigene0020891	0.2224	35.1095	7.30256	4.91e-100	3.8e-99	--
Unigene0020892	0.001	16.6312	14.0216	7.24e-37	3.03e-36	--
Unigene0020893	0.001	28.8648	14.817	9.27e-120	8.14e-119	--
Unigene0020896	0.001	4.6585	12.1856	6.17e-21	1.92e-20	--
Unigene0020899	0.104	12.8764	6.952	5.04e-40	2.21e-39	--
Unigene0020913	0.2848	8.4592	4.8925	2.78e-17	7.89e-17	--
Unigene0020958	0.001	3.2568	11.6692	1.5e-10	3.38e-10	--
Unigene0021004	0.0164	22.7109	10.4355	0	0	PREDICTED: mucin-19-like [Saccoglossus kowalevskii]
Unigene0021085	0.001	2.9347	11.519	5.78e-06	1.02e-05	--
Unigene0021086	0.1462	42.2794	8.17587	0	0	Dual specificity protein phosphatase CDC14A [Zootermopsis nevadensis]
Unigene0021087	0.001	2.3036	11.1697	0.000145836	0.000233094	--
Unigene0021089	0.001	33.8114	15.0452	8.2e-147	8.41e-146	--
Unigene0021100	0.0953	6.7935	6.15554	1.23e-43	5.64e-43	GTP-binding protein, partial [Semibalanus balanoides]
Unigene0021119	0.001	1.4174	10.469	6.14e-05	0.000101469	--
Unigene0021129	0.001	0.9555	9.90011	0.00097925	0.00147092	--
Unigene0021164	0.1493	6.9081	5.532	4.24e-14	1.1e-13	solute carrier family 2 protein [Myzus persicae]
Unigene0021171	0.0606	121.179	10.9655	0	0	PREDICTED: kielin/chordin-like protein [Strongylocentrotus purpuratus]
Unigene0021172	0.001	0.4489	8.81025	0.0312734	0.0412699	--
Unigene0021197	0.0627	64.6959	10.011	0	0	polehole-like protein [Penaeus monodon]
Unigene0021211	0.001	4.6896	12.1952	1.76e-17	5.01e-17	--
Unigene0021213	0.1766	5.5578	4.97596	4.02e-27	1.42e-26	--
Unigene0021214	0.001	4.204	12.0375	1.78e-15	4.8e-15	--
Unigene0021215	0.001	14.0213	13.7753	4.46e-28	1.61e-27	--
Unigene0021216	0.001	5.7327	12.485	3.4e-17	9.61e-17	--
Unigene0021217	0.001	9.1351	13.1572	1.69e-27	6.02e-27	Carboxypeptidase E [Zootermopsis nevadensis]
Unigene0021218	0.001	2.5618	11.3229	5.78e-06	1.02e-05	--
Unigene0021221	0.204	3.444	4.07744	8.57e-10	1.87e-09	--
Unigene0021224	0.1755	2.8528	4.02284	3.62e-05	6.11e-05	--
Unigene0021225	0.001	0.9179	9.84219	0.0156414	0.0212459	--
Unigene0021226	0.001	37.2717	15.1858	9.3e-107	7.52e-106	PREDICTED: carboxypeptidase E-like [Tribolium castaneum]
Unigene0021228	0.001	11.5433	13.4948	1.96e-37	8.28e-37	--
Unigene0021229	0.001	4.805	12.2303	2.93e-10	6.49e-10	--
Unigene0021230	0.1797	397.62	11.1116	0	0	--
Unigene0021234	0.1475	12.3597	6.38878	5.33e-27	1.88e-26	--
Unigene0021263	0.1111	23.2382	7.7085	0	0	PREDICTED: ATPase family AAA domain-containing protein 2-like isoform X1 [Microplitis demolitor]
Unigene0021293	0.1478	122.412	9.69389	0	0	AGAP003290-PA [Anopheles gambiae str. PEST]
Unigene0021313	0.001	41.4279	15.3383	0	0	--
Unigene0021319	0.0332	23.5873	9.47261	0	0	PREDICTED: protein SpAN-like [Saccoglossus kowalevskii]
Unigene0021321	0.001	2.4319	11.2479	1.11e-05	1.92e-05	--
Unigene0021322	0.0483	14.8124	8.26057	0	0	PREDICTED: monocarboxylate transporter 12 isoform X6 [Cerapachys biroi]
Unigene0021342	0.001	29.6683	14.8566	0	0	--
Unigene0021371	0.2381	3.4988	3.87722	3.2e-08	6.44e-08	--
Unigene0021372	0.001	2.4254	11.244	7.68e-05	0.000125849	--
Unigene0021376	0.001	30.1858	14.8816	0	0	PREDICTED: uncharacterized protein LOC100370625 [Saccoglossus kowalevskii]
Unigene0021400	0.1706	2.7739	4.02323	3.62e-05	6.11e-05	--
Unigene0021411	0.001	2.2232	11.1184	1.57e-06	2.88e-06	--
Unigene0021435	0.001	72.0641	16.137	2.95e-174	3.47e-173	--
Unigene0021438	0.001	0.4155	8.6987	0.0312734	0.0412699	UPF0676 protein C1494.01 [Acromyrmex echinatior]
Unigene0021439	0.001	32.4454	14.9857	4.89e-120	4.29e-119	--
Unigene0021440	0.2156	25.443	6.88277	9.41e-146	9.59e-145	--
Unigene0021466	0.001	3.3348	11.7034	5.34e-12	1.28e-11	--
Unigene0021467	0.001	47.0252	15.5211	4.55e-261	7.57e-260	alpha-tubulin [Heliconius melpomene]
Unigene0021570	0.001	0.7867	9.61967	0.0312734	0.0412699	--
Unigene0021571	0.001	4.0241	11.9745	6.59e-17	1.85e-16	--
Unigene0021578	0.092	893.517	13.2456	0	0	--
Unigene0021579	0.001	26.2121	14.6779	1.58e-69	9.53e-69	--
Unigene0021598	0.0482	218.803	12.1483	0	0	seminal fluid protein CSSFP033 [Chilo suppressalis]
Unigene0021629	0.0978	6.5754	6.0711	7.28e-42	3.26e-41	--
Unigene0021634	0.001	1.2814	10.3235	0.000489894	0.000754178	--
Unigene0021694	0.0381	66.3563	10.7662	0	0	--
Unigene0021750	0.0932	23.9383	8.00478	0	0	--
Unigene0021773	0.0742	54.0548	9.50879	0	0	--
Unigene0021784	0.001	4.5429	12.1494	5.34e-12	1.28e-11	--
Unigene0021786	0.001	8.4176	13.0392	1.07e-144	1.08e-143	Monocarboxylate transporter 10 [Crassostrea gigas]
Unigene0021787	0.001	7.4473	12.8625	3.35e-29	1.24e-28	GH13480 [Drosophila grimshawi]
Unigene0021792	0.001	2.978	11.5401	4.24e-07	8.05e-07	--
Unigene0021851	0.0193	11.8752	9.26514	0	0	PREDICTED: cilia- and flagella-associated protein 61-like [Crassostrea gigas]
Unigene0021856	0.001	2.6677	11.3814	3.01e-06	5.44e-06	--
Unigene0021909	0.1376	2.5819	4.22988	5.72e-06	1.01e-05	--
Unigene0021983	0.001	57.5254	15.8119	7.65e-150	7.98e-149	Carboxypeptidase E [Zootermopsis nevadensis]
Unigene0022005	0.0251	23.6619	9.88066	0	0	--
Unigene0022006	0.001	21.2835	14.3774	4.69e-153	4.98e-152	--
Unigene0022019	0.001	5.8441	12.5128	5.34e-12	1.28e-11	--
Unigene0022020	0.001	23.1514	14.4988	2.42e-58	1.31e-57	--
Unigene0022032	0.2309	26.6169	6.84893	1.63e-107	1.33e-106	--
Unigene0022198	0.1627	290.792	10.8036	0	0	--
Unigene0022199	0.098	200.557	10.9989	0	0	F33E2.6 [Caenorhabditis elegans]
Unigene0022200	0.001	69.3391	16.0814	2.74e-123	2.46e-122	--
Unigene0022248	0.001	3.0243	11.5624	1.57e-06	2.88e-06	--
Unigene0022254	0.001	11.9784	13.5481	8.76e-26	3.02e-25	--
Unigene0022260	0.0453	5.0551	6.80208	2.2e-70	1.34e-69	Radixin, partial [Stegodyphus mimosarum]
Unigene0022277	0.001	4.3874	12.0992	4.55e-24	1.52e-23	PREDICTED: NADPH oxidase 5 [Monomorium pharaonis]
Unigene0022284	0.0189	77.607	12.0036	0	0	PREDICTED: major facilitator superfamily domain-containing protein 8-like isoform X1 [Crassostrea gigas]
Unigene0022289	0.0764	0.4301	2.49303	0.00756354	0.0106159	--
Unigene0022298	0.001	0.5752	9.16792	0.0156414	0.0212459	--
Unigene0022310	0.001	95.7782	16.5474	0	0	--
Unigene0022335	0.0644	23.2219	8.49421	0	0	--
Unigene0022361	0.001	56.5776	15.7879	2.43e-172	2.84e-171	GI19279 [Drosophila mojavensis]
Unigene0022362	0.001	43.0601	15.3941	0	0	GG15621 [Drosophila erecta]
Unigene0022363	0.001	80.1821	16.291	0	0	--
Unigene0022364	0.0295	52.7952	10.8055	0	0	--
Unigene0022412	0.1523	10.0631	6.04602	0	0	Retrovirus-related Pol polyprotein from transposon 412, partial [Stegodyphus mimosarum]
Unigene0022471	0.001	129.795	16.9859	0	0	PREDICTED: protein SpAN-like [Saccoglossus kowalevskii]
Unigene0022503	0.0955	71.6458	9.55117	0	0	PREDICTED: kielin/chordin-like protein [Ciona intestinalis]
Unigene0022517	0.0697	13.2745	7.57328	8.29e-236	1.26e-234	PREDICTED: dynein heavy chain 3, axonemal-like isoform X4 [Crassostrea gigas]
Unigene0022518	0.0471	12.1276	8.00835	2.11e-163	2.36e-162	PREDICTED: dynein heavy chain 3, axonemal-like [Ciona intestinalis]
Unigene0022546	0.001	19.5038	14.2515	0	0	PREDICTED: sodium- and chloride-dependent glycine transporter 1-like [Aplysia californica]
Unigene0022609	0.001	29.5581	14.8513	5.95e-125	5.4e-124	RecName: Full=Kunitz-type protease inhibitor kalicludine-3; Short=AsKC3 [Anemonia sulcata]
Unigene0022611	0.001	34.6229	15.0794	6.33e-103	5e-102	--
Unigene0022646	0.2638	4.4543	4.07768	2.32e-13	5.84e-13	--
Unigene0022698	0.001	5.9722	12.544	9.08e-18	2.6e-17	--
Unigene0022713	0.001	3.3725	11.7196	1.57e-08	3.21e-08	--
Unigene0022714	0.0682	28.8273	8.72345	0	0	--
Unigene0022741	0.001	54.9469	15.7458	4.41e-185	5.48e-184	--
Unigene0022744	0.001	2.6743	11.3849	5.88e-08	1.17e-07	--
Unigene0022761	0.132	24.7196	7.54897	0	0	--
Unigene0022765	0.001	1.0164	9.98925	0.0156414	0.0212459	--
Unigene0022783	0.001	13.18	13.6861	4.46e-56	2.36e-55	--
Unigene0022787	0.0164	20.5261	10.2895	0	0	PREDICTED: trithorax group protein osa-like [Diaphorina citri]
Unigene0022828	0.001	4.9948	12.2862	2.46e-16	6.8e-16	--
Unigene0022846	0.1067	4.8705	5.51244	8.12e-28	2.92e-27	--
Unigene0022959	0.001	4.2564	12.0554	6.29e-23	2.05e-22	--
Unigene0022980	0.0379	4.5924	6.92091	6.62e-39	2.85e-38	PREDICTED: papilin isoform X5 [Bombus impatiens]
Unigene0022981	0.1087	8.2951	6.25384	1.71e-47	8.21e-47	--
Unigene0022982	0.1452	9.9188	6.09405	2.34e-83	1.6e-82	PREDICTED: papilin isoform X2 [Acyrthosiphon pisum]
Unigene0022984	0.2174	12.3281	5.82545	0	0	PREDICTED: papilin isoform X5 [Apis florea]
Unigene0022988	0.001	1.7065	10.7368	8.16e-07	1.52e-06	--
Unigene0023007	0.0262	25.5509	9.92959	0	0	PREDICTED: WASH complex subunit CCDC53 homolog isoform X2 [Athalia rosae]
Unigene0023029	0.1479	1071.72	12.823	0	0	circumsporozoite protein [Plasmodium fieldi]
Unigene0023069	0.2335	21.4723	6.52291	0	0	--
Unigene0023072	0.001	1.2366	10.2722	6.14e-05	0.000101469	--
Unigene0023086	0.001	10.7788	13.3959	8.17e-54	4.23e-53	--
Unigene0023101	0.001	8.6455	13.0777	9.23e-32	3.57e-31	--
Unigene0023119	0.036	16.593	8.84836	1.5e-289	2.73e-288	--
Unigene0023120	0.001	22.8587	14.4805	0	0	--
Unigene0023121	0.001	1.2036	10.2331	0.000122627	0.000197706	--
Unigene0023122	0.001	4.169	12.0255	7.72e-11	1.76e-10	--
Unigene0023126	0.001	5.5563	12.4399	3.4e-17	9.61e-17	--
Unigene0023128	0.001	11.8526	13.5329	6.29e-23	2.05e-22	--
Unigene0023138	0.001	8.4103	13.0379	2.76e-38	1.18e-37	--
Unigene0023157	0.0585	29.5453	8.98028	0	0	CCDC151 [Schmidtea mediterranea]
Unigene0023298	0.001	7.6204	12.8957	4.08e-87	2.87e-86	--
Unigene0023314	0.001	2.943	11.5231	2.93e-10	6.49e-10	--
Unigene0023319	0.001	18.6926	14.1902	1.58e-155	1.7e-154	PREDICTED: thioredoxin domain-containing protein 3 homolog isoform X5 [Crassostrea gigas]
Unigene0023320	0.1109	15.3188	7.1099	2.13e-171	2.48e-170	--
Unigene0023321	0.001	0.8381	9.71098	0.000245094	0.000385742	hypothetical protein KGM_01772 [Danaus plexippus]
Unigene0023363	0.001	27.5513	14.7498	2.66e-161	2.95e-160	--
Unigene0023385	0.0102	19.7235	10.9171	0	0	reverse transcriptase, partial [Nuttalliella namaqua]
Unigene0023386	0.001	0.9326	9.86511	0.000122627	0.000197706	--
Unigene0023388	0.001	5.324	12.3783	2.46e-14	6.4e-14	ATP-dependent Clp protease proteolytic subunit [Plasmodium vivax Sal-1]
Unigene0023446	0.001	1.6003	10.6441	0.000489894	0.000754178	--
Unigene0023501	0.001	29.2395	14.8356	0	0	A-kinase anchor protein 9 [Zootermopsis nevadensis]
Unigene0023507	0.001	1.4753	10.5268	0.00097925	0.00147092	--
Unigene0023513	0.001	2.5441	11.3129	8.16e-07	1.52e-06	Kelch-like protein 3, partial [Stegodyphus mimosarum]
Unigene0023561	0.001	8.9903	13.1342	2.4e-72	1.49e-71	AGAP011401-PA [Anopheles gambiae str. PEST]
Unigene0023571	0.1522	26.171	7.42586	0	0	PREDICTED: kielin/chordin-like protein [Ciona intestinalis]
Unigene0023576	0.1027	21.9959	7.74265	0	0	snRNA-activating protein complex subunit 3 [Zootermopsis nevadensis]
Unigene0023584	0.001	150.154	17.1961	0	0	AGAP010159-PA [Anopheles gambiae str. PEST]
Unigene0023588	0.001	39.9413	15.2856	1.18e-274	2.05e-273	--
Unigene0023589	0.025	66.2295	11.3713	0	0	PREDICTED: serine protease nudel isoform X3 [Harpegnathos saltator]
Unigene0023631	0.0741	2.5004	5.07654	1.37e-10	3.09e-10	--
Unigene0023658	0.2502	4.1454	4.05036	1.57e-09	3.39e-09	--
Unigene0023682	0.001	3.427	11.7427	2.93e-10	6.49e-10	--
Unigene0023710	0.001	10.7082	13.3864	2.06e-82	1.4e-81	--
Unigene0023758	0.001	13.6704	13.7388	2.02e-39	8.76e-39	--
Unigene0023818	0.1255	4.8265	5.26522	1.23e-22	3.97e-22	--
Unigene0023844	0.001	2.3513	11.1992	5.78e-06	1.02e-05	--
Unigene0023864	0.001	49.3647	15.5912	4.57e-186	5.72e-185	hypothetical protein PCYB_146590, partial [Plasmodium cynomolgi strain B]
Unigene0023865	0.0538	68.9493	10.3237	0	0	PREDICTED: zonadhesin-like [Crassostrea gigas]
Unigene0023895	0.001	3.4046	11.7333	2.93e-10	6.49e-10	--
Unigene0023897	0.001	6.6508	12.6993	1.76e-17	5.01e-17	--
Unigene0023932	0.001	34.0124	15.0538	0	0	--
Unigene0023938	0.0689	1.5952	4.53309	7.81e-07	1.46e-06	--
Unigene0023976	0.001	1.0037	9.97111	0.000489894	0.000754178	PREDICTED: LOW QUALITY PROTEIN: kinesin-like protein KIF2A [Strongylocentrotus purpuratus]
Unigene0023987	0.001	59.6009	15.863	0	0	--
Unigene0023988	0.001	1.1239	10.1343	0.000145836	0.000233094	--
Unigene0024017	0.2409	2.3101	3.26145	2.57e-07	4.93e-07	--
Unigene0024023	0.0619	2.9036	5.55176	2.26e-14	5.9e-14	--
Unigene0024049	0.001	0.4687	8.87252	0.00782344	0.0109487	--
Unigene0024053	0.1624	4.0109	4.6263	1.3e-14	3.42e-14	PREDICTED: actin cytoskeleton-regulatory complex protein SLA1-like [Strongylocentrotus purpuratus]
Unigene0024090	0.2437	13.5647	5.79861	0	0	Retrovirus-related Pol polyprotein from transposon 412, partial [Stegodyphus mimosarum]
Unigene0024133	0.2794	4.1061	3.87736	3.2e-08	6.44e-08	--
Unigene0024177	0.001	23.473	14.5187	7.76e-61	4.31e-60	--
Unigene0024179	0.001	43.7527	15.4171	0	0	--
Unigene0024202	0.1549	3.0998	4.32277	1.65e-06	3.02e-06	--
Unigene0024209	0.001	1.7149	10.7439	6.14e-05	0.000101469	--
Unigene0024262	0.0553	2.6647	5.59055	9.64e-30	3.6e-29	polyprotein [Mizuhopecten yessoensis]
Unigene0024265	0.001	0.7639	9.57724	0.00097925	0.00147092	--
Unigene0024288	0.0937	16.0595	7.42116	1.71e-55	9.01e-55	--
Unigene0024289	0.001	2.3047	11.1704	7.68e-05	0.000125849	--
Unigene0024290	0.1789	1.5658	3.12967	0.0129695	0.0177627	carboxypeptidase E [Trichinella spiralis]
Unigene0024291	0.001	1.2484	10.2859	0.00391328	0.00561741	Carboxypeptidase E [Zootermopsis nevadensis]
Unigene0024292	0.001	1.4753	10.5268	0.00097925	0.00147092	carboxypeptidase E [Trichinella spiralis]
Unigene0024294	0.001	1.0066	9.97527	0.0156414	0.0212459	Carboxypeptidase E [Zootermopsis nevadensis]
Unigene0024298	0.2654	20.5791	6.27687	2.53e-48	1.23e-47	Carboxypeptidase E [Zootermopsis nevadensis]
Unigene0024299	0.1341	10.8208	6.33435	7e-26	2.42e-25	PREDICTED: carboxypeptidase E-like [Tribolium castaneum]
Unigene0024300	0.001	17.8748	14.1256	6.31e-57	3.37e-56	PREDICTED: carboxypeptidase E-like [Tribolium castaneum]
Unigene0024302	0.1226	23.9947	7.61261	2.44e-63	1.39e-62	--
Unigene0024309	0.0246	18.535	9.55738	0	0	--
Unigene0024310	0.001	12.9633	13.6621	2.88e-270	4.96e-269	--
Unigene0024313	0.001	3.1405	11.6168	3.4e-17	9.61e-17	PREDICTED: LOW QUALITY PROTEIN: transcription factor hamlet [Diaphorina citri]
Unigene0024319	0.001	2.0568	11.0062	5.7e-10	1.25e-09	--
Unigene0024479	0.0572	276.146	12.2371	0	0	Stereocilin [Zootermopsis nevadensis]
Unigene0024538	0.001	33.6172	15.0369	0	0	PREDICTED: midasin-like [Hydra vulgaris]
Unigene0024539	0.178	27.1584	7.25338	1.37e-49	6.78e-49	--
Unigene0024543	0.1041	6.6752	6.00277	2.21e-39	9.58e-39	--
Unigene0024544	0.0589	3.5334	5.90665	2.42e-19	7.24e-19	--
Unigene0024545	0.1183	7.2857	5.94455	9.88e-38	4.19e-37	--
Unigene0024546	0.1301	10.4975	6.33428	1.55e-50	7.73e-50	--
Unigene0024554	0.0514	7.2248	7.13505	4.11e-45	1.92e-44	--
Unigene0024556	0.0901	34.1357	8.56554	4.54e-122	4.04e-121	--
Unigene0024566	0.001	3.4636	11.7581	8.1e-09	1.68e-08	--
Unigene0024584	0.001	3.2024	11.6449	3.37e-13	8.45e-13	--
Unigene0024616	0.001	22.132	14.4338	0	0	integrase core domain protein [Trichuris suis]
Unigene0024715	0.001	0.3493	8.44832	0.0312734	0.0412699	Transposable element P transposase, partial [Stegodyphus mimosarum]
Unigene0024732	0.1789	5.2846	4.88457	5.24e-34	2.1e-33	PREDICTED: zinc finger RNA-binding protein 2 [Bactrocera dorsalis]
Unigene0024734	0.001	0.9187	9.84345	0.00782344	0.0109487	PREDICTED: protein mesh isoform X1 [Bombyx mori]
Unigene0024763	0.1032	11.8721	6.84599	0	0	PREDICTED: uncharacterized protein C5orf42 homolog [Crassostrea gigas]
Unigene0024764	0.2783	20.9653	6.23522	0	0	--
Unigene0024808	0.001	0.7185	9.48884	0.0156414	0.0212459	--
Unigene0024927	0.001	3.4913	11.7695	9.06e-30	3.39e-29	--
Unigene0024942	0.001	0.7492	9.54921	0.00782344	0.0109487	--
Unigene0024964	0.001	0.7573	9.56472	0.0312734	0.0412699	--
Unigene0025040	0.2377	11.8544	5.64014	1.35e-59	7.37e-59	--
Unigene0025066	0.1617	2.578	3.99486	5.28e-09	1.11e-08	PREDICTED: serine/threonine-protein phosphatase 4 regulatory subunit 3 isoform X2 [Microplitis demolitor]
Unigene0025069	0.001	11.1701	13.4474	1.02e-37	4.33e-37	--
Unigene0025072	0.1046	12.6875	6.92238	6.62e-39	2.85e-38	--
Unigene0025075	0.1286	17.6851	7.1035	2.58e-87	1.82e-86	--
Unigene0025077	0.001	0.7203	9.49245	0.0312734	0.0412699	--
Unigene0025078	0.2128	11.8418	5.79825	2.72e-34	1.09e-33	--
Unigene0025079	0.0618	17.9451	8.18177	0	0	--
Unigene0025080	0.1522	33.1687	7.76771	2.21e-269	3.8e-268	--
Unigene0025081	0.0701	18.8105	8.06791	4.94e-87	3.48e-86	--
Unigene0025112	0.1576	6.3051	5.32218	8.65e-13	2.14e-12	enzymatic poly [Lasius niger]
Unigene0025211	0.1646	4.4759	4.76514	3.13e-16	8.63e-16	PREDICTED: autophagy-related protein 2 homolog B [Microplitis demolitor]
Unigene0025229	0.0631	14.6053	7.85464	7.36e-147	7.55e-146	--
Unigene0025291	0.001	46.2501	15.4972	1.04e-177	1.25e-176	alpha-tubulin [Mytilus edulis]
Unigene0025298	0.1527	25.1563	7.36408	6.69e-104	5.32e-103	tubulin alpha-1 chain [Clonorchis sinensis]
Unigene0025321	0.1517	0.5219	1.78255	0.0227353	0.0304633	Tensin [Zootermopsis nevadensis]
Unigene0025479	0.001	1.7038	10.7345	0.000122627	0.000197706	--
Unigene0025481	0.0695	19.5462	8.13566	1.24e-90	9.02e-90	--
Unigene0025482	0.001	6.3818	12.6397	6.45e-29	2.37e-28	--
Unigene0025484	0.001	81.853	16.3207	0	0	--
Unigene0025485	0.001	21.4574	14.3892	3.22e-71	1.98e-70	--
Unigene0025486	0.001	55.7481	15.7666	0	0	predicted protein [Nematostella vectensis]
Unigene0025487	0.001	4.4522	12.1203	2.93e-10	6.49e-10	predicted protein [Nematostella vectensis]
Unigene0025488	0.001	1.8102	10.8219	0.000276113	0.000432611	--
Unigene0025791	0.1304	2.201	4.07714	3.62e-05	6.11e-05	PREDICTED: cell wall protein DAN4 isoform X2 [Tribolium castaneum]
Unigene0025793	0.1525	71.4929	8.87285	0	0	PREDICTED: testis-specific serine/threonine-protein kinase 3-like, partial [Athalia rosae]
Unigene0025796	0.089	3.6174	5.345	4.57e-13	1.14e-12	--
Unigene0025799	0.001	5.4229	12.4048	2.3e-28	8.38e-28	--
Unigene0025803	0.2571	2.8939	3.49261	6.27e-06	1.1e-05	--
Unigene0025809	0.001	2.6013	11.345	4.18e-09	8.81e-09	--
Unigene0025810	0.001	11.035	13.4298	5.21e-134	4.97e-133	--
Unigene0025819	0.001	2.9053	11.5045	2.2e-07	4.23e-07	PREDICTED: dynein beta chain, ciliary [Strongylocentrotus purpuratus]
Unigene0025827	0.001	2.591	11.3393	4.24e-07	8.05e-07	--
Unigene0025835	0.001	2.1728	11.0853	1.57e-06	2.88e-06	60S ribosomal protein L7 [Loa loa]
Unigene0025844	0.001	0.7749	9.59787	0.000245094	0.000385742	--
Unigene0025845	0.001	0.5179	9.01653	0.00782344	0.0109487	--
Unigene0025847	0.0967	3.3246	5.10352	7.3e-11	1.67e-10	--
Unigene0025848	0.001	2.7189	11.4088	2.2e-07	4.23e-07	--
Unigene0025849	0.2834	3.4845	3.62004	1.91e-09	4.09e-09	--
Unigene0025856	0.001	2.4979	11.2865	2.15e-09	4.6e-09	--
Unigene0025865	0.2904	2.2697	2.96639	0.000279321	0.000437285	--
Unigene0025866	0.1706	5.0499	4.88757	3.02e-25	1.03e-24	PREDICTED: alpha-N-acetylgalactosamine-specific lectin-like, partial [Strongylocentrotus purpuratus]
Unigene0025886	0.001	4.0438	11.9815	9.85e-36	4.06e-35	PREDICTED: protein FAN isoform X1 [Vollenhovia emeryi]
Unigene0025897	0.1638	2.6122	3.99526	5.28e-09	1.11e-08	--
Unigene0025908	0.001	2.2003	11.1035	4.04e-05	6.76e-05	--
Unigene0025911	0.2729	3.6974	3.76007	1.03e-10	2.33e-10	BRCA1 [Strongylocentrotus purpuratus]
Unigene0025913	0.001	2.3457	11.1958	4.04e-05	6.76e-05	--
Unigene0025928	0.001	3.604	11.8154	1.24e-12	3.06e-12	--
Unigene0025929	0.001	2.7178	11.4082	5.78e-06	1.02e-05	--
Unigene0025930	0.001	4.4222	12.1105	1.04e-11	2.46e-11	--
Unigene0025942	0.2938	3.3073	3.49275	1.9e-08	3.87e-08	--
Unigene0025952	0.001	2.0069	10.9708	3.01e-06	5.44e-06	--
Unigene0025956	0.001	3.4665	11.7593	4.55e-24	1.52e-23	--
Unigene0025958	0.001	5.9083	12.5285	2.53e-49	1.24e-48	--
Unigene0025961	0.001	2.8861	11.4949	1.5e-10	3.38e-10	--
Unigene0025964	0.001	1.6603	10.6972	6.14e-05	0.000101469	--
Unigene0025967	0.1092	2.5269	4.53232	7.81e-07	1.46e-06	rna-directed dna polymerase from mobile element jockey-like protein [Lasius niger]
Unigene0025968	0.2293	2.3653	3.36671	3.44e-05	5.81e-05	--
Unigene0025971	0.001	2.7883	11.4452	2.2e-07	4.23e-07	--
Unigene0025972	0.001	3.6013	11.8143	5.88e-08	1.17e-07	--
Unigene0025979	0.001	2.7237	11.4114	4.18e-09	8.81e-09	--
Unigene0025982	0.109	5.6388	5.69299	2.55e-62	1.44e-61	--
Unigene0025986	0.001	2.0308	10.9878	0.000145836	0.000233094	--
Unigene0025987	0.001	3.9456	11.946	6.62e-15	1.75e-14	--
Unigene0025988	0.0638	3.9517	5.95277	6.69e-20	2.03e-19	--
Unigene0025991	0.2309	3.3692	3.86707	9.65e-12	2.29e-11	--
Unigene0025995	0.001	3.7042	11.8549	3.04e-08	6.13e-08	--
Unigene0026002	0.1668	2.7114	4.02285	3.62e-05	6.11e-05	--
Unigene0026010	0.1755	2.3042	3.71472	0.000732495	0.00111306	--
Unigene0026015	0.242	3.4046	3.81441	1.05e-07	2.07e-07	--
Unigene0026016	0.001	3.2354	11.6597	4.53e-20	1.38e-19	--
Unigene0026020	0.001	4.2614	12.0571	1.28e-14	3.35e-14	HrPalE [Halocynthia roretzi]
[truncated: 2,505 more rows]

## Sheet: Table S4
Table S4. List of DEGs that assigned to Neuroactive ligand-receptor interaction pathway
GeneID	cyprid_rpkm	adult_rpkm	log2 Ratio(adult/cyprid)	Pvalue	FDR	Description
Unigene0004872	11.1224	0.1506	-6.2066	0	0	PREDICTED: glutamate receptor ionotropic, NMDA 2B isoform X2 [Bombus impatiens]
Unigene0040220	3.4662	0.0985	-5.13709	3.03e-08	6.12e-08	PREDICTED: zinc metalloproteinase dpy-31-like [Crassostrea gigas]
Unigene0029842	3.2383	0.2025	-3.99924	1.11e-09	2.4e-09	resistance to dieldrin [Drosophila simulans]
Unigene0017792	21.4177	1.7422	-3.61982	0	0	PREDICTED: glycine receptor subunit alpha-2-like [Metaseiulus occidentalis]
Unigene0035609	6.9325	0.7992	-3.11675	9.01e-42	4.03e-41	allatostatin receptor [Periplaneta americana]
Unigene0003102	12.4713	1.5564	-3.00233	1.28e-202	1.71e-201	gamma-aminobutyric acid receptor LCCH3 subunit [Apis mellifera]
Unigene0000274	0.6013	0.0806	-2.89923	0.000732495	0.00111306	PREDICTED: glutamate [NMDA] receptor subunit 1 isoform X2 [Athalia rosae]
Unigene0036610	2.6587	0.3694	-2.84747	1.98e-06	3.6e-06	gamma-aminobutyric acid B receptor [Daphnia pulex]
Unigene0033234	2.9886	0.4153	-2.84724	6.66e-05	0.000109855	GL18426 [Drosophila persimilis]
Unigene0013278	14.2496	2.125	-2.74539	1.03e-48	5.03e-48	Glutamate receptor, ionotropic kainate 3, partial [Stegodyphus mimosarum]
Unigene0018682	19.4323	3.457	-2.49086	2.31E-319	4.60E-318	ionotropic glutamate receptor [Ostrinia furnacalis]
Unigene0000276	8.5123	1.5146	-2.49061	6.46e-23	2.1e-22	PREDICTED: glutamate [NMDA] receptor subunit 1 [Orussus abietinus]
Unigene0004137	11.5186	2.0753	-2.47257	4.86e-168	5.56e-167	gamma-aminobutyric acid receptor isoform 3a [Plutella xylostella]
Unigene0013279	10.4106	2.0105	-2.37243	2.63e-119	2.3e-118	AGAP000801-PB [Anopheles gambiae str. PEST]
Unigene0000976	3.7889	0.7897	-2.2624	4.1e-10	9.06e-10	PREDICTED: glutamate receptor 1 [Tribolium castaneum]
Unigene0000977	3.9292	0.945	-2.05585	0.000117812	0.00019096	PREDICTED: LOW QUALITY PROTEIN: glutamate receptor 1-like [Diaphorina citri]
Unigene0039297	3.6902	0.9999	-1.88384	8.67e-09	1.8e-08	AAEL010207-PA [Aedes aegypti]
Unigene0002550	9.561	2.8344	-1.75412	6.39e-29	2.35e-28	neuronal acetylcholine receptor subunit alpha-4 [Culex quinquefasciatus]
Unigene0000505	3.6442	1.0938	-1.73625	0.00107663	0.00161254	GH18993 [Drosophila grimshawi]
Unigene0035608	0.7373	0.2305	-1.67749	0.0169593	0.0229433	FGLa/AST receptor [Rhodnius prolixus]
Unigene0000672	2.4566	0.7681	-1.6773	0.0169593	0.0229433	Glutamate [NMDA] receptor subunit epsilon-1, partial [Stegodyphus mimosarum]
Unigene0041178	2.5352	0.9908	-1.35543	1.29e-08	2.65e-08	PREDICTED: glutamate receptor 1 [Tribolium castaneum]
Unigene0011005	3.175	1.2523	-1.34218	3.14e-06	5.65e-06	PREDICTED: glutamate receptor ionotropic, NMDA 2B isoform X2 [Acyrthosiphon pisum]
Unigene0000506	4.5899	2.0568	-1.15806	8.14e-05	0.000133194	PREDICTED: glutamate [NMDA] receptor subunit 1 [Diaphorina citri]
Unigene0007747	10.7104	5.1234	-1.06384	1.57e-20	4.85e-20	PREDICTED: glutamate receptor ionotropic, kainate 2 [Plutella xylostella]
Unigene0000416	3.75	1.8106	-1.05042	3.51e-05	5.92e-05	PREDICTED: glycine receptor subunit alpha-3-like [Metaseiulus occidentalis]
Unigene0012777	12.8686	6.2214	-1.04854	3.51e-61	1.96e-60	PREDICTED: calcitonin gene-related peptide type 1 receptor-like [Acyrthosiphon pisum]
Unigene0029206	1.0413	2.3151	1.15269	0.033719	0.0443959	GABA-gated ion channel [Apis mellifera]
Unigene0042431	1.6699	4.5007	1.43039	3.29e-19	9.84e-19	PREDICTED: gamma-aminobutyric acid type B receptor subunit 2-like, partial [Apis dorsata]
Unigene0033101	1.0749	2.9873	1.47464	3.09e-05	5.23e-05	PREDICTED: G-protein coupled receptor GRL101-like [Diaphorina citri]
Unigene0019988	2.3918	6.6702	1.47963	1.77e-23	5.81e-23	PREDICTED: glutamate receptor ionotropic, kainate 2-like [Tribolium castaneum]
Unigene0042430	1.2747	3.6231	1.50707	1.85e-06	3.37e-06	AGAP004595-PA-like protein [Anopheles sinensis]
Unigene0008339	3.1473	9.2301	1.55223	4.66e-69	2.81e-68	PREDICTED: relaxin receptor 1 isoform X2 [Vollenhovia emeryi]
Unigene0037883	1.2729	3.8625	1.60142	1.09e-10	2.48e-10	PREDICTED: neuropeptide Y receptor type 2 isoform X1 [Orussus abietinus]
Unigene0028871	2.0706	6.3505	1.61682	6.68e-13	1.66e-12	metabotropic GABA-B receptor subtype 2 [Periplaneta americana]
Unigene0041955	1.2978	4.4393	1.77426	3.97e-07	7.57e-07	Metabotropic glutamate receptor, partial [Stegodyphus mimosarum]
Unigene0012077	3.1878	11.1918	1.81181	1.12e-87	7.93e-87	GH14016 [Drosophila grimshawi]
Unigene0035757	0.7836	3.1236	1.99502	5.33e-05	8.87e-05	PREDICTED: thyrotropin receptor-like [Tribolium castaneum]
Unigene0026307	0.6986	3.0577	2.12991	2.92e-06	5.29e-06	PREDICTED: neuropeptides capa receptor-like isoform X1 [Apis dorsata]
Unigene0028652	0.6856	3.0547	2.15559	5.28e-06	9.41e-06	PREDICTED: neuropeptide F receptor [Bactrocera cucurbitae]
Unigene0032399	1.9608	9.8345	2.32641	2.35e-68	1.4e-67	type 1 serotonin receptor [Procambarus clarkii]
Unigene0000038	1.4023	7.1457	2.34928	8.62e-51	4.32e-50	neuropeptide GPCR A45 [Nilaparvata lugens]
Unigene0041954	0.7623	4.5622	2.5813	3.46e-15	9.26e-15	PREDICTED: metabotropic glutamate receptor-like [Metaseiulus occidentalis]
Unigene0004710	0.3412	2.1338	2.64474	0.00444281	0.00633867	PREDICTED: corticotropin-releasing factor receptor 2-like, partial [Metaseiulus occidentalis]
Unigene0000326	0.8774	5.7056	2.70107	1.13e-23	3.75e-23	PREDICTED: follicle-stimulating hormone receptor-like [Metaseiulus occidentalis]
Unigene0038494	0.6086	4.5034	2.88745	1.46e-09	3.15e-09	Gamma-aminobutyric acid receptor subunit alpha-4 [Zootermopsis nevadensis]
Unigene0040656	0.5555	5.8441	3.39512	2.15e-39	9.33e-39	Beta-3 adrenergic receptor [Zootermopsis nevadensis]
Unigene0000325	0.2428	3.5676	3.87711	3.2e-08	6.44e-08	--
Unigene0003003	0.1714	2.6796	3.96658	6.66e-05	0.000109855	PREDICTED: peregrin-like, partial [Plutella xylostella]
Unigene0023027	0.7278	20.0921	4.78694	0	0	--
Unigene0037335	0.1132	5.7313	5.66192	4.85e-75	3.09e-74	ionotropic glutamate receptor subunit [Homarus americanus]
Unigene0007769	0.1535	8.0435	5.71151	2.73e-78	1.79e-77	GJ24267 [Drosophila virilis]
Unigene0009721	0.1128	17.44	7.27249	6.35e-145	6.44e-144	AAEL007602-PA [Aedes aegypti]
Unigene0002164	0.0284	5.0461	7.47313	1.21e-56	6.42e-56	GG17113 [Drosophila erecta]
Unigene0006579	0.0343	8.1598	7.89418	5.1e-77	3.3e-76	Gamma-aminobutyric acid A receptor/Glycine receptor alpha family and Neurotransmitter-gated ion-channel transmembrane domain and Neurotransmitter-gated ion-channel family and Neurotransmitter-gated ion-channel ligand-binding domain-containing protein [Strongyloides ratti]
Unigene0007916	0.1987	57.8334	8.18517	0	0	PREDICTED: glutamate receptor ionotropic, kainate 2-like [Crassostrea gigas]
Unigene0040398	0.001	0.9014	9.81602	0.000276113	0.000432611	PREDICTED: metabotropic glutamate receptor [Megachile rotundata]
Unigene0040399	0.001	1.0916	10.0922	2.12e-05	3.61e-05	PREDICTED: metabotropic glutamate receptor [Megachile rotundata]
Unigene0027322	0.001	2.6196	11.3551	1.57e-08	3.21e-08	Gamma-aminobutyric acid A receptor/Glycine receptor alpha family and Neurotransmitter-gated ion-channel transmembrane domain and Neurotransmitter-gated ion-channel family and Neurotransmitter-gated ion-channel ligand-binding domain-containing protein [Strongyloides ratti]
Unigene0032804	0.001	2.7612	11.4311	5.78e-06	1.02e-05	PREDICTED: glycine receptor subunit alpha-2-like [Saccoglossus kowalevskii]
Unigene0029424	0.001	3.0798	11.5886	1.57e-06	2.88e-06	GF12548 [Drosophila ananassae]
Unigene0040500	0.001	3.2384	11.6611	7.72e-11	1.76e-10	PREDICTED: diuretic hormone receptor [Musca domestica]
Unigene0027714	0.001	3.6013	11.8143	1.11e-09	2.4e-09	Laminin subunit beta-1 [Camponotus floridanus]
Unigene0001517	0.001	7.3043	12.8345	6.05e-130	5.65e-129	cys-loop ligand-gated ion channel subunit 12344 precursor [Nasonia vitripennis]
Unigene0041443	0.001	9.1387	13.1578	2.94e-117	2.54e-116	PREDICTED: glutamate-gated chloride channel isoform X5 [Nasonia vitripennis]
Unigene0036718	0.001	26.3349	14.6847	0	0	PREDICTED: glycine receptor subunit alpha-3-like [Saccoglossus kowalevskii]
Unigene0011236	0.001	31.7975	14.9566	0	0	PREDICTED: glycine receptor subunit alphaZ1-like [Crassostrea gigas]
Unigene0019017	0.001	74.6577	16.188	0	0	PREDICTED: blastula protease 10-like [Crassostrea gigas]
Unigene0022471	0.001	129.795	16.9859	0	0	PREDICTED: protein SpAN-like [Saccoglossus kowalevskii]

## Sheet: Table S5
Table S5. Primers for qRT-PCR analysis of differentially expressed genes
ID	Description	Primer sequence
Unigene0022849	actin [Daphnia magna]	Forward	CAGTCCAAGCGTGGTATCCT
		Reverse	GTCATCTTCTCGCGGTTAGC
Unigene0011261	Cuticle protein 6 [Lepeophtheirus salmonis]	Forward	TCGCCAGACCTCTAGCCTAC
		Reverse	ACGTAGCTCACCGTCTGCTT
Unigene0012539	arginine kinase [Scylla olivacea]	Forward	CAGTCCGGTGTTGAGAACCT
		Reverse	GTCCACGTTTCCGACAGAGT
Unigene0013686	ATP-binding cassette sub-family G member 5 [Zootermopsis nevadensis]	Forward	CTCGGAGACCACTGTGTCAA
		Reverse	GGAGACCGTGCAGTAGAAGC
Unigene0015143	cement protein-100k [Megabalanus rosa] (Mvcp-113k)	Forward	GCCGTTCGACTACAACTTCC
		Reverse	AGTCTGGTGCGTCCAAAGAC
Unigene0017833	BCS-4 [Amphibalanus amphitrite]	Forward	CCATCTGTCTGCCTAACACG
		Reverse	TTTCTTCGCACCTGGAGTTC
Unigene0024373	settlement inducing protein complex [Megabalanus coccopoma] (SIPC)	Forward	CGAAGCAGAATCCTTCAACC
		Reverse	CCTCTTCAAGACAGGCGAAG
Unigene0025201	Autophagy-related protein 2-like protein B [Zootermopsis nevadensis]	Forward	GGGTGGTGGGATACGTACAG
		Reverse	TAACCAGCTCGTAGGCGTTT
Unigene0037803	chitin deacetylase 2 [Nilaparvata lugens]	Forward	CGTCGCAGGAAGAAACTCTC
		Reverse	TCCAGTCACACGACTGCTTC
Unigene0027896	sex peptide receptor [Bemisia tabaci] (ASTB rec)	Forward	TGGTGCTGAATATCCTGCTG
		Reverse	ATTGGGATCTCCACGATCAG
Unigene0008728	A-type allatostatin [Amphibalanus amphitrite] (ASTA)	Forward	TCGATCCTACCGGTCCTATG
		Reverse	ACCGTACGTCTGTCGCTTCT
Unigene0035609	allatostatin receptor [Periplaneta americana] (ASTA rec)	Forward	GTGTCCCATCCAGATCATCC
		Reverse	GAGGAGCGCAGTAGATCACC
Unigene0019648	B-type allatostatin, partial [Amphibalanus amphitrite] (ASTB)	Forward	AAACGGAAGAACTGGGACAA
		Reverse	GCCTCCTGAAGTGTCGGTAG
Unigene0004594	opsin 5 [Limulus polyphemus] (Mv-opsin5)	Forward	CAGTGTTCCAGCACGAGAAG
		Reverse	CACACCGAGATGTTGACCAG
